# Supplementary material for: A Complete Assessment of Dopamine Receptor-Ligand Interactions through Computational Methods
Source: Preprints.org preprint supplement (doi:10.20944/preprints201902.0064.v1), 2019-02-06
Supplement: Supplementary file 2 [file supplementary]

*Article*

**A complete assessment of dopamine receptor-ligand interactions through computational methods**

**Beatriz Bueschbell**1**, Carlos A. V. Barreto**2**, António J. Preto**2, **Anke C. Schiedel1 and Irina S. Moreira**2,3*

1. PharmaCenter Bonn, Pharmaceutical Institute, Pharmaceutical Chemistry I, University of Bonn, D-53121 Bonn, Germany; [bueschbell@uni-bonn.de](mailto:bueschbell@uni-bonn.de); [schiedel@uni-bonn.de](mailto:schiedel@uni-bonn.de)
2. Center for Neuroscience and Cell Biology, UC- Biotech Parque Tecnológico de Cantanhede, Núcleo 04, Lote B, 3060-197 Cantanhede, Portugal; cbarreto@cnc.uc.pt; [martinsgomes.jose@gmail.com](mailto:martinsgomes.jose@gmail.com); [irina.moreira@cnc.uc.pt](mailto:irina.moreira@cnc.uc.pt).
3. Institute for Interdisciplinary Research, University of Coimbra.

*****Correspondence: irina.moreira@cnc.uc.pt; Tel.: +351 231 249 730

**Supplementary Information**


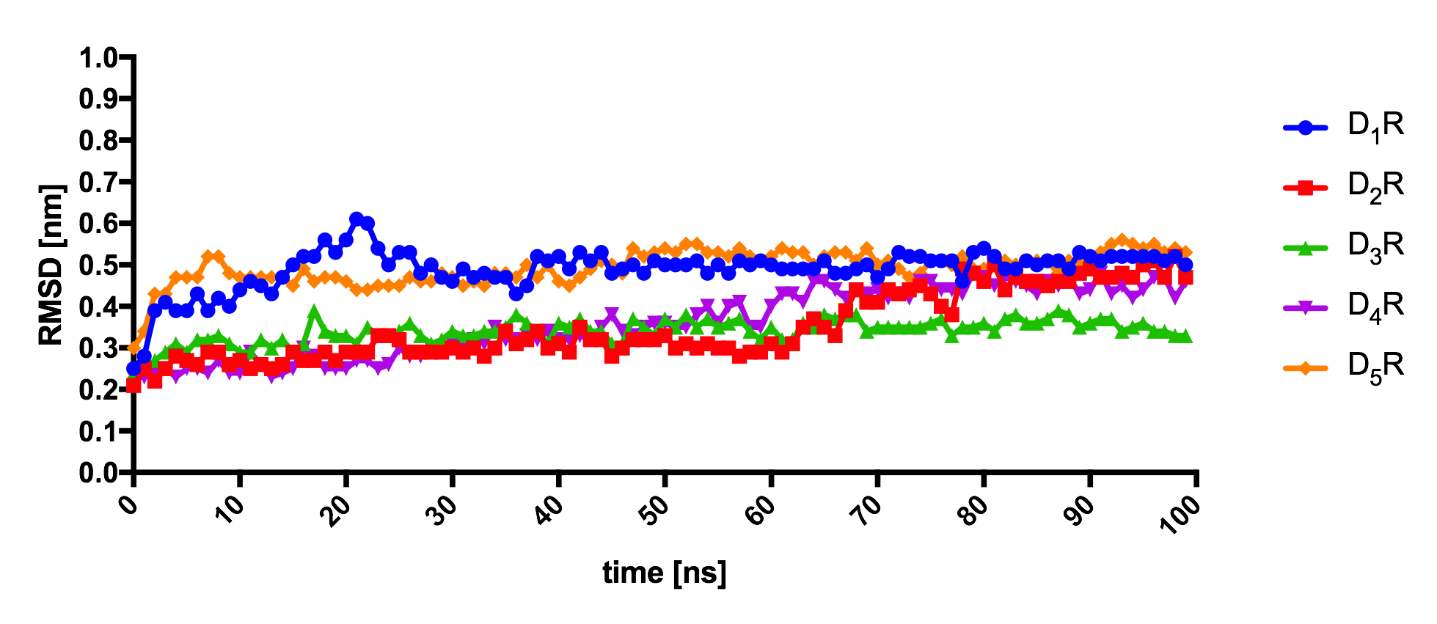


**Figure S1 – RMSD throughout the 100 ns of simulation for all models of DR**.


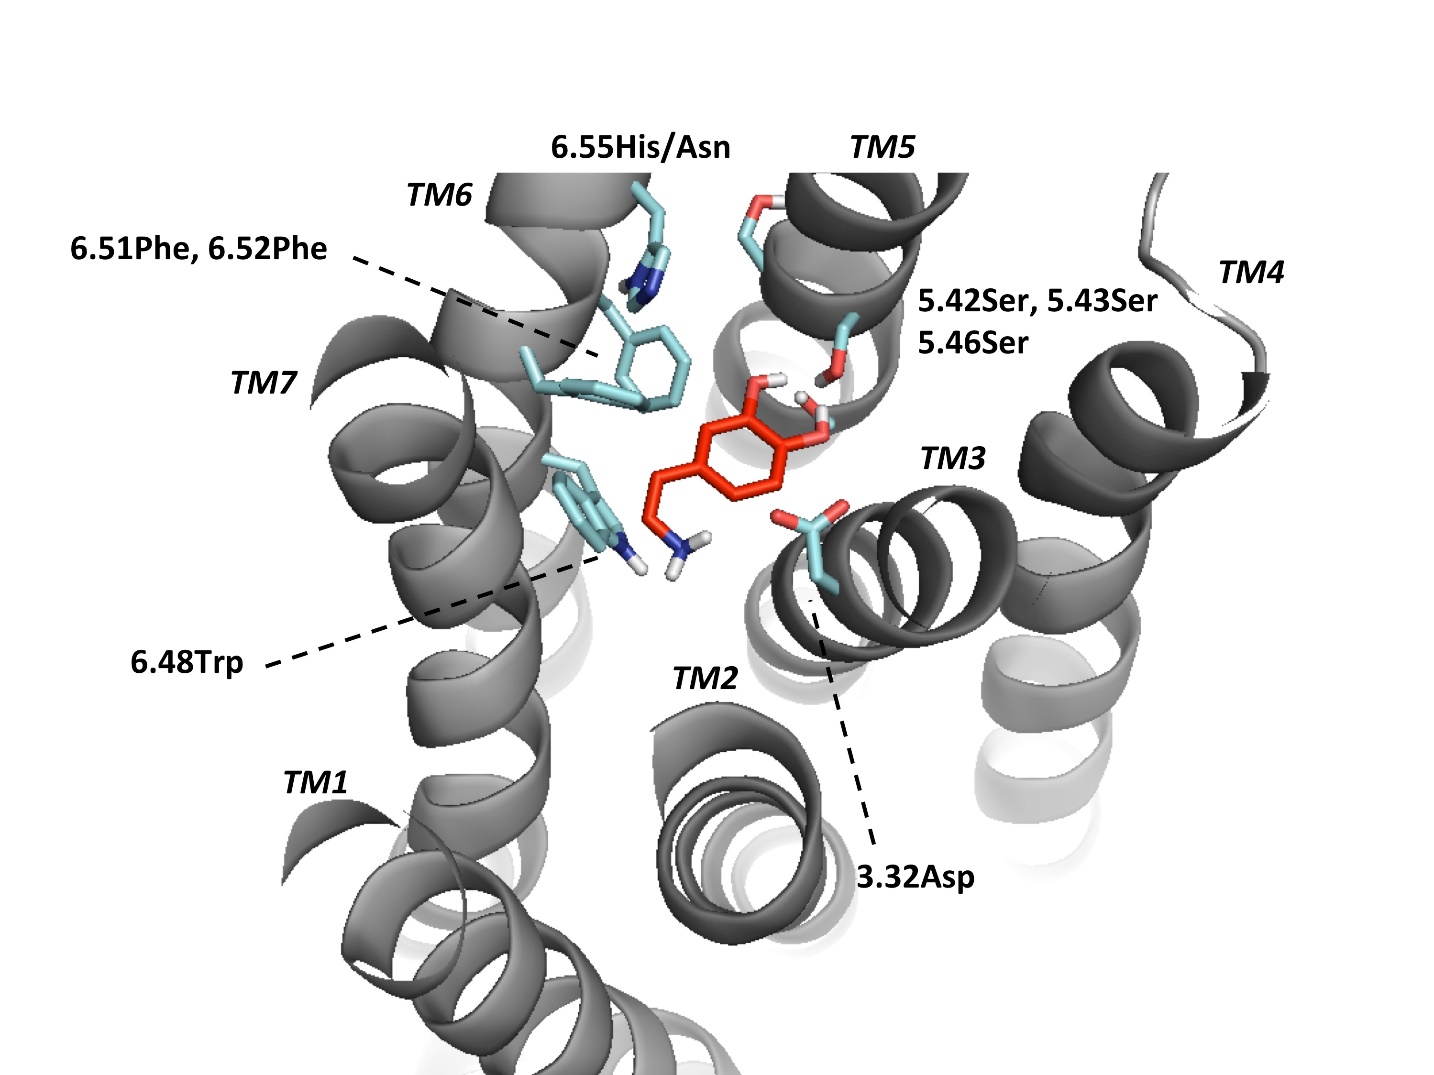


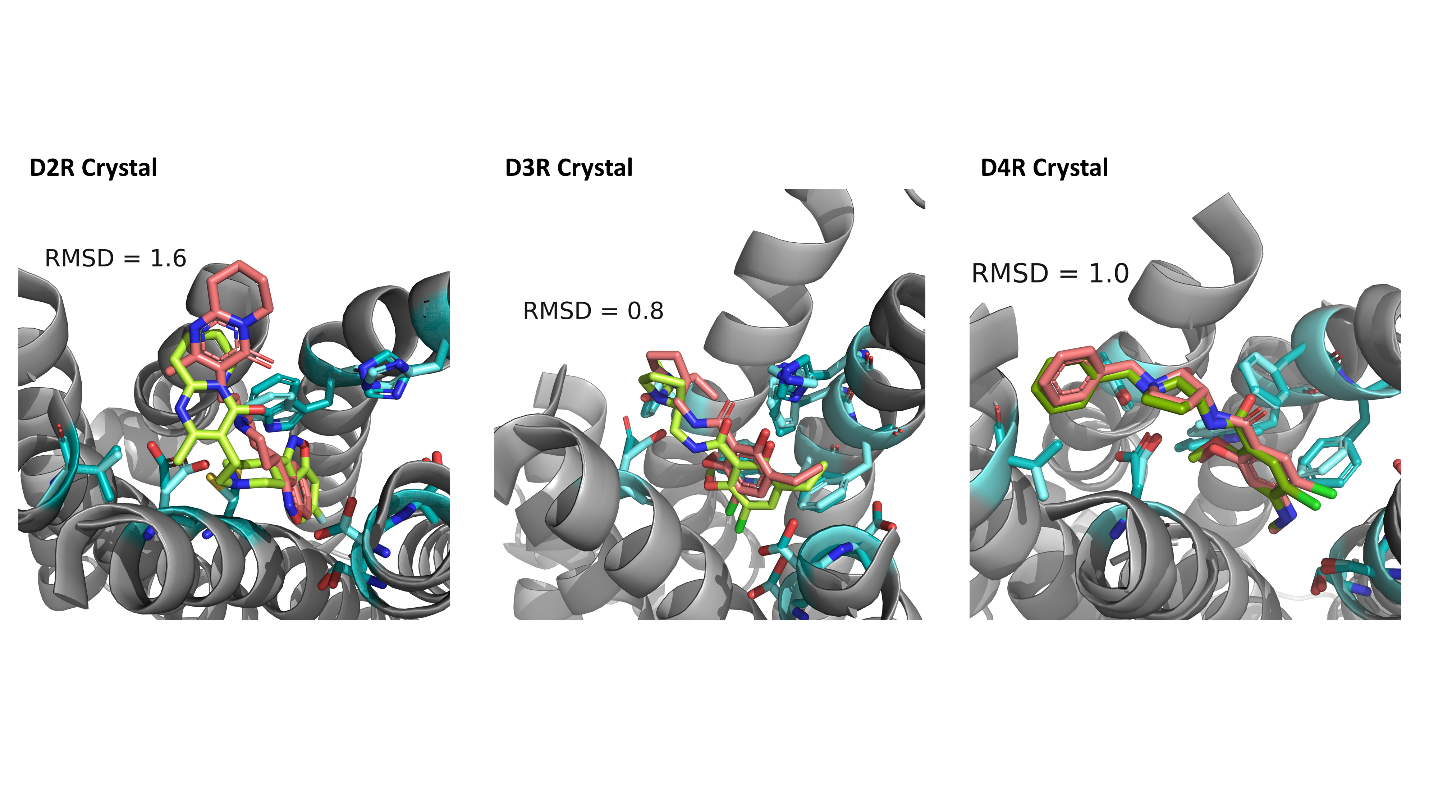
**F****igure S2 - Important residues for molecular docking of Dopamine to the DR models.** Residues are designated in bold and colored in cyan, TransMembrane helices (TMs) in bold and italic. This set-up was kept for Figures S3-7.

**Figure S3 – Redocking of ligands with their respective DR and bound ligand (**D2R, D3R and D4R PDB-ids are respectively: 6CM4 [1], 3PBL [2], 5WIU [3])**.** RMSD values between ligand pose in crystal (pink) and docking output (green) are displayed. Interacintg residues were chosen according to Figure S2.


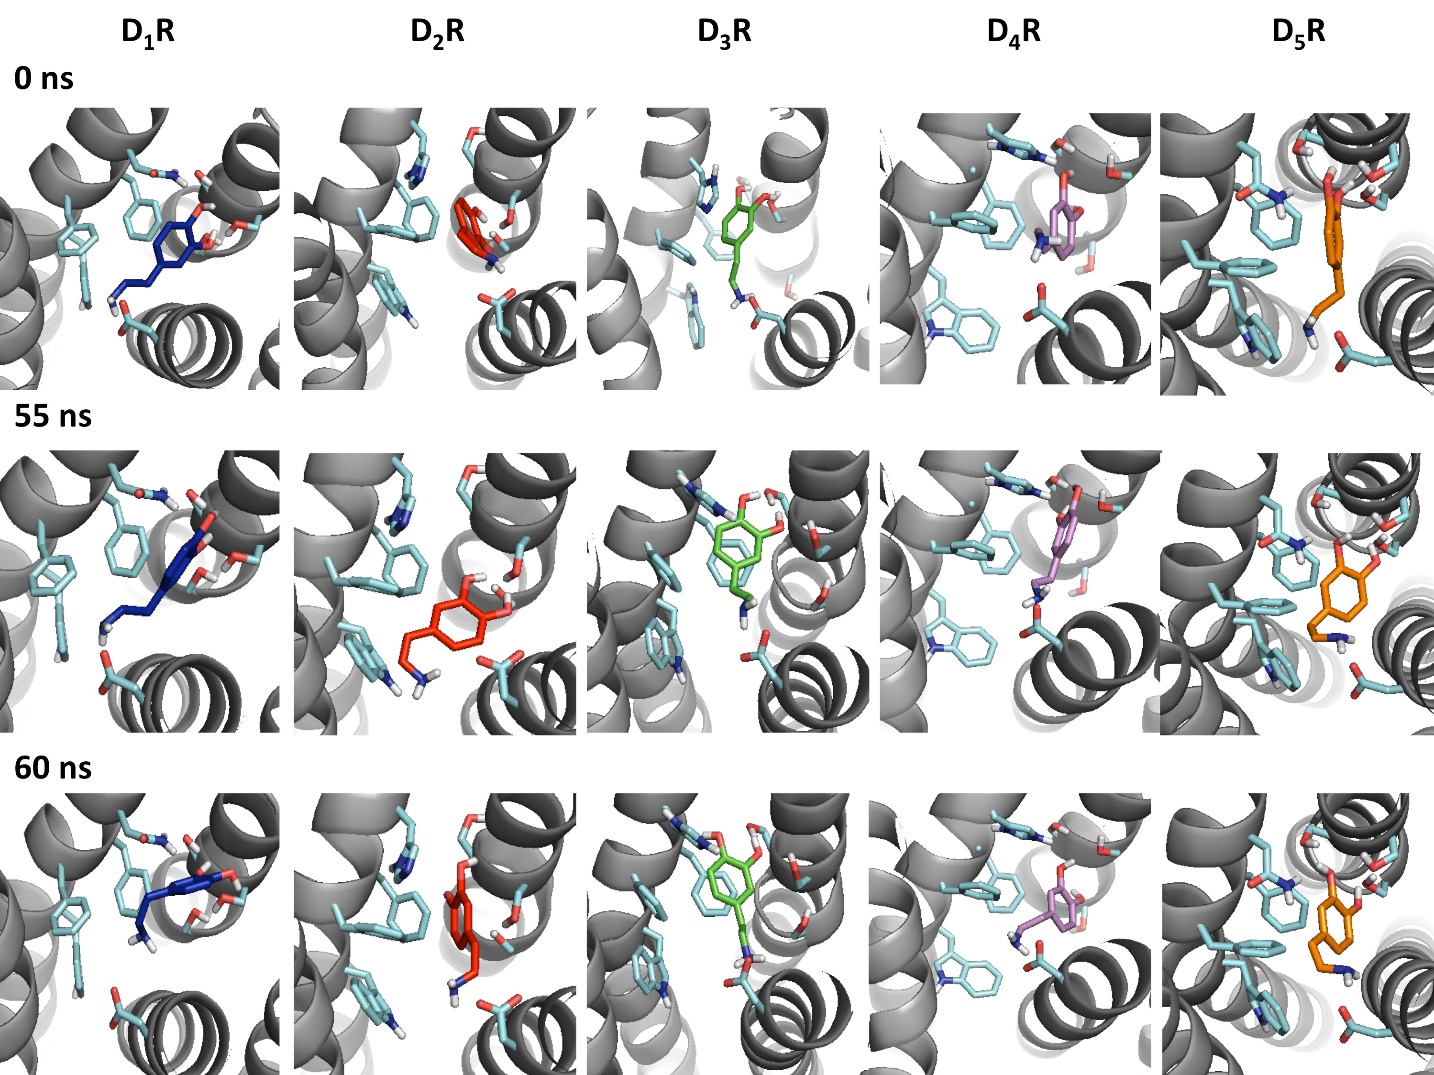
**Figure S4 - Molecular docking of Dopamine at the D1R – D5R during 0 – 60 ns.** The images correspond to the cluster with the lowest binding energy [kcal/mol] and highest number of conformations. D1R, D2R, D3R, D4R and D5R were colored blue, red, green, violet and orange, respectively. Interacting residues are colored cyan.


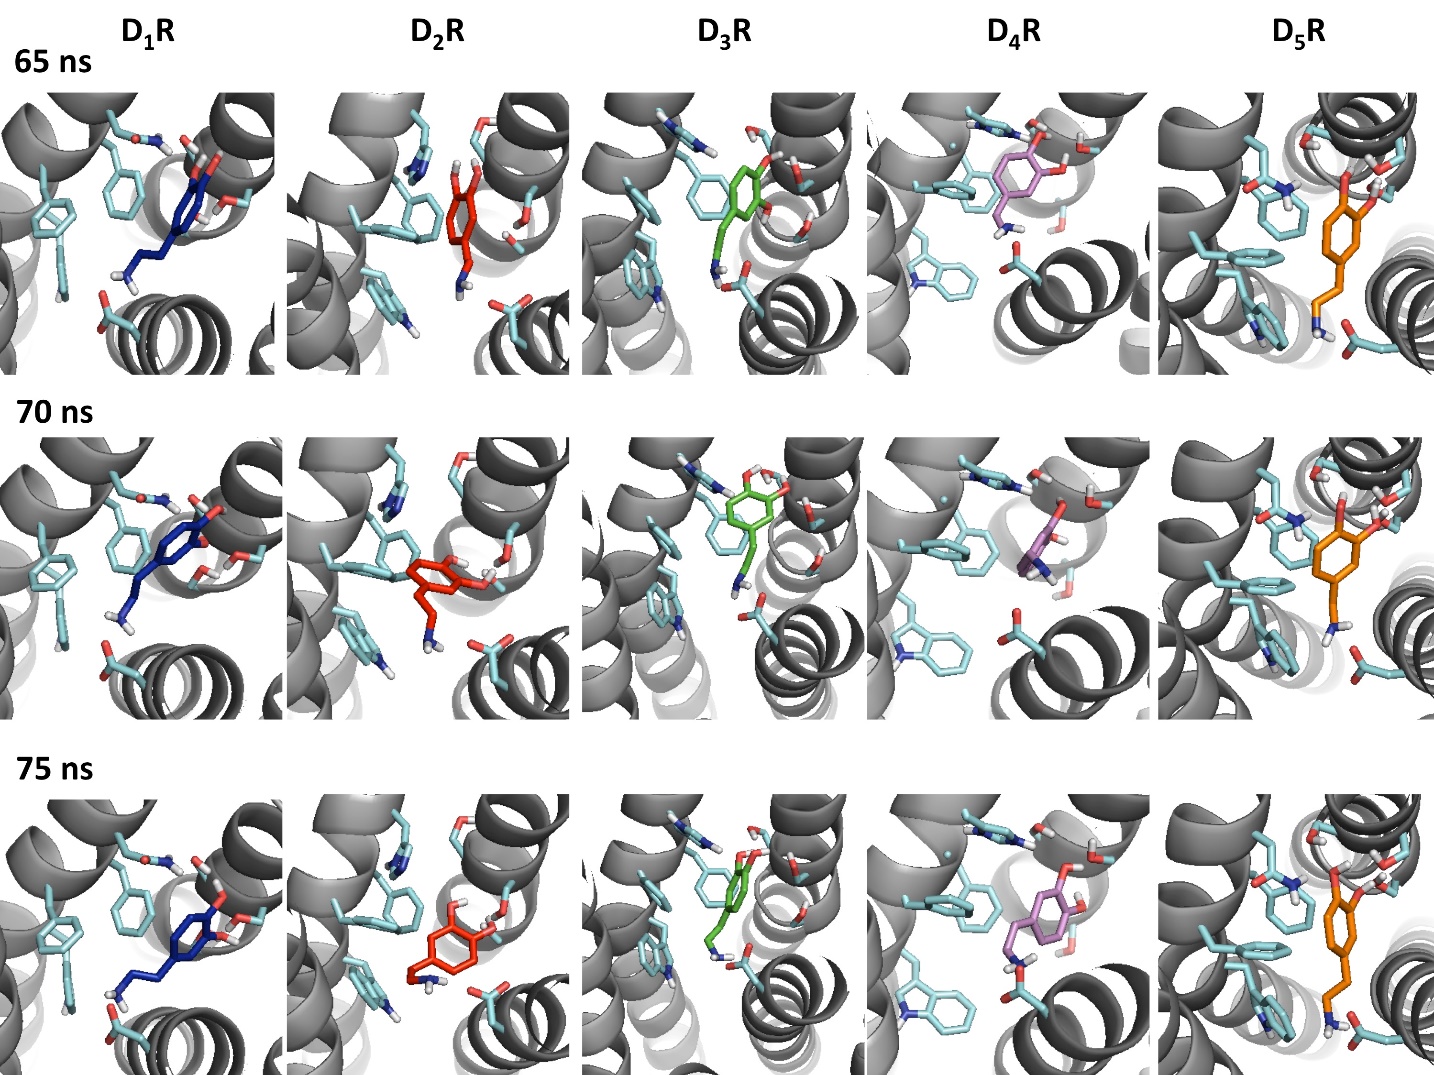


**Figure S5 - Molecular docking of Dopamine at the D1R – D5R during 65 – 75 ns.** The images correspond to the cluster with the lowest binding energy [kcal/mol] and highest number of conformations. D1R, D2R, D3R, D4R and D5R were colored blue, red, green, violet and orange, respectively. Interacting residues are colored cyan.


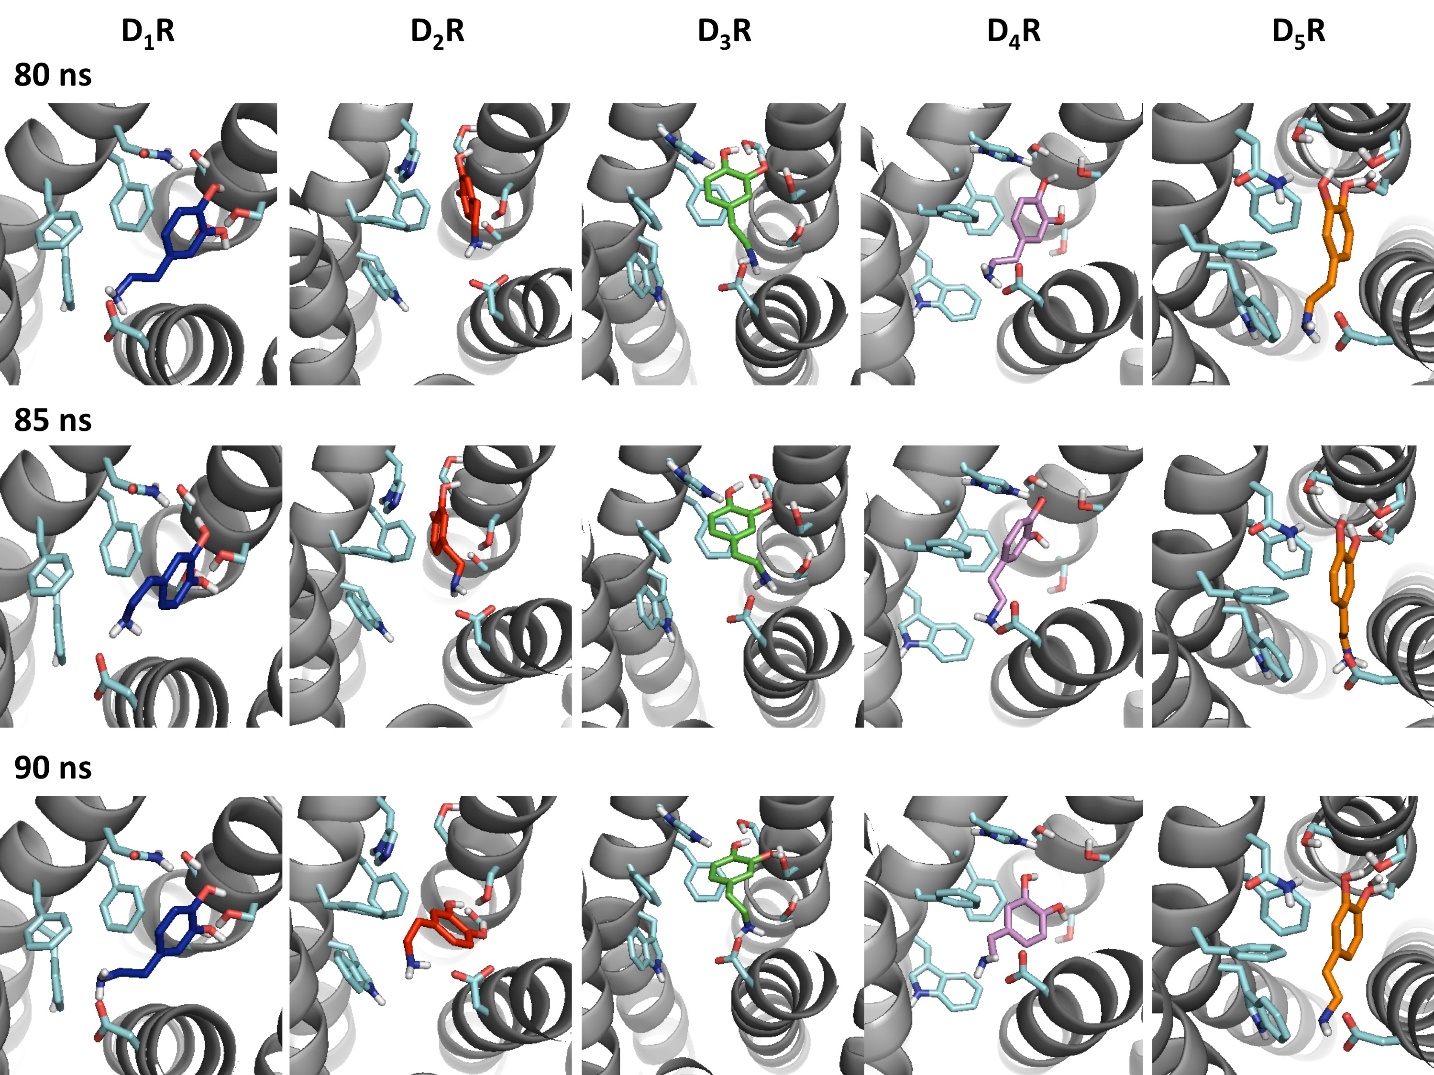


**Figure S6 - Molecular docking of Dopamine at the D1R – D5R during 80 –90 ns**. The images correspond to the cluster with the lowest binding energy [kcal/mol] and highest number of conformations. D1R, D2R, D3R, D4R and D5R were colored blue, red, green, violet and orange, respectively. Interacting residues are colored cyan.


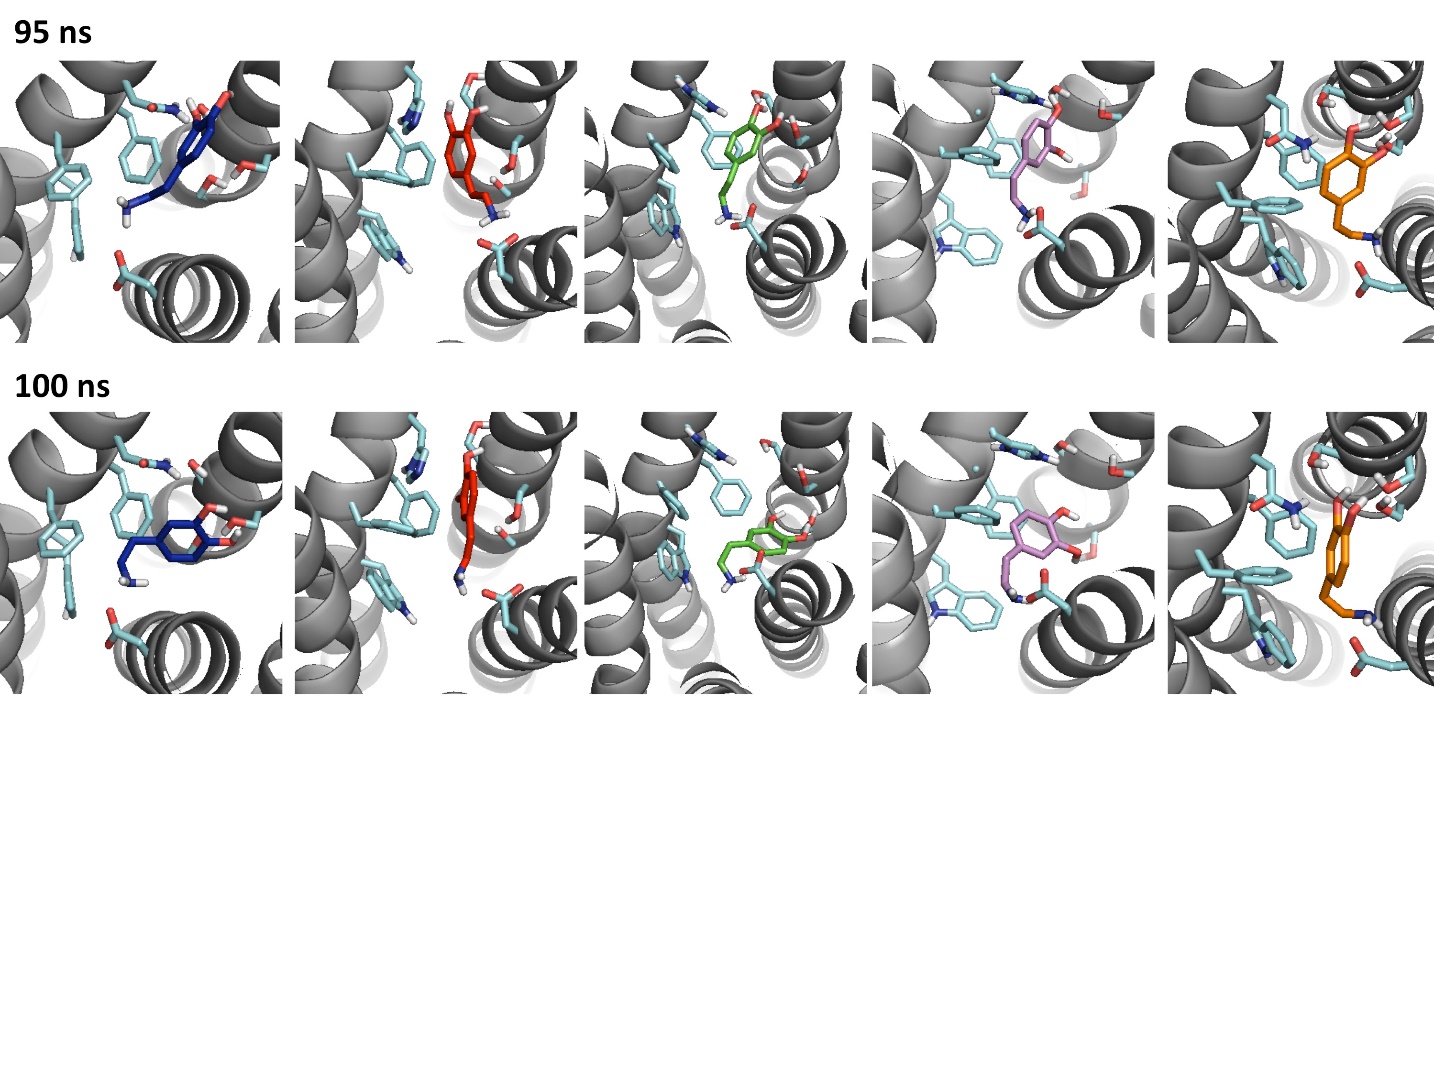
**Figure S7 - Molecular docking of Dopamine at the D1R – D5R during 95 and 100 ns**. The images correspond to the cluster with the lowest binding energy [kcal/mol] and highest number of conformations. D1R, D2R, D3R, D4R and D5R were colored blue, red, green, violet and orange, respectively. Interacting residues are colored cyan.

**Figure S8 - Results of the molecular docking of bromocriptine, clozapine, sulpiride, eticlopride, aripiprazole, risperidone and spiperone for all DR subtypes at different receptor conformations in various time points [ns].** The mean of the 3 lowest binding energies of dopamine were calculated in the left plots. The number of conformations of the three clusters with the lowest binding energies were plotted for each time point and receptor (right plot).

**Figure S9 - Total interactions counted for each DR over time points [ns].** The interactions were summarized for all ligands and interaction types. The DR-subtypes are color-coded.

**Figure S10 – Pair-wise intercations results for dopamine.** Each type of interaction is displayed over all time points for each DR. The DR-subtypes are color-coded. Abbreviations: 2.5 Å – interactions within 2.5 Å; 4 Å – interactions within 4 Å; cat-π – cation-π-interactions; HB – hydrogen bonds; π-π-stack – interactions involving π-π-stacking; SB – salt-bridge; T-stack – aromatic superposition (edge-face-interactions).

F**igure S11 - Pair-wise intercations results for 7-OH-DPAT.** Each type of interaction is displayed over all time points for each DR. The DR-subtypes are color-coded. Abbreviations: 2.5 Å – interactions within 2.5 Å; 4 Å – interactions within 4 Å; cat-π – cationic π-interactions; HB – hydrogen bonds; π-π-stack – interactions involving π-π-stacking; SB – salt-bridge; T-stack – aromatic superposition (edge-face-interactions).

**Figure S12 - Pair-wise intercations results for apomorphine.** Each type of interaction is displayed over all time points for each DR. The DR-subtypes are color-coded. Abbreviations: 2.5 Å – interactions within 2.5 Å; 4 Å – interactions within 4 Å; cat-π – cationic π-interactions; HB – hydrogen bonds; π-π-stack – interactions involving π-π-stacking; SB – salt-bridge; T-stack – aromatic superposition (edge-face-interactions).

**Figure S13 - Pair-wise intercations results for bromocriptine.** Each type of interaction is displayed over all time points for each DR. The DR-subtypes are color-coded. Abbreviations: 2.5 Å – interactions within 2.5 Å; 4 Å – interactions within 4 Å; cat-π – cationic π-interactions; HB – hydrogen bonds; π-π-stack – interactions involving π-π-stacking; SB – salt-bridge; T-stack – aromatic superposition (edge-face-interactions).

**Figure S14 - Pair-wise intercations results for clozapine.** Each type of interaction is displayed over all time points for each DR. The DR-subtypes are color-coded. Abbreviations: 2.5 Å – interactions within 2.5 Å; 4 Å – interactions within 4 Å; cat-π – cationic π-interactions; HB – hydrogen bonds; π-π-stack – interactions involving π-π-stacking; SB – salt-bridge; T-stack – aromatic superposition (edge-face-interactions).

**Figure S15 - Pair-wise intercations results for nemonapride.** Each type of interaction is displayed over all time points for each DR. The DR-subtypes are color-coded. Abbreviations: 2.5 Å – interactions within 2.5 Å; 4 Å – interactions within 4 Å; cat-π – cationic π-interactions; HB – hydrogen bonds; π-π-stack – interactions involving π-π-stacking; SB – salt-bridge; T-stack – aromatic superposition (edge-face-interactions).

**Figure S16 - Pair-wise intercations results for sulpiride.** Each type of interaction is displayed over all time points for each DR. The DR-subtypes are color-coded. Abbreviations: 2.5 Å – interactions within 2.5 Å; 4 Å – interactions within 4 Å; cat-π – cationic π-interactions; HB – hydrogen bonds; π-π-stack – interactions involving π-π-stacking; SB – salt-bridge; T-stack – aromatic superposition (edge-face-interactions).

**Figure S17 - Pair-wise intercations results for SCH23390.** Each type of interaction is displayed over all time points for each DR. The DR-subtypes are color-coded. Abbreviations: 2.5 Å – interactions within 2.5 Å; 4 Å – interactions within 4 Å; cat-π – cationic π-interactions; HB – hydrogen bonds; π-π-stack – interactions involving π-π-stacking; SB – salt-bridge; T-stack – aromatic superposition (edge-face-interactions).

**Figure S18 - Pair-wise intercations results for SKF38393.** Each type of interaction is displayed over all time points for each DR. The DR-subtypes are color-coded. Abbreviations: 2.5 Å – interactions within 2.5 Å; 4 Å – interactions within 4 Å; cat-π – cationic π-interactions; HB – hydrogen bonds; π-π-stack – interactions involving π-π-stacking; SB – salt-bridge; T-stack – aromatic superposition (edge-face-interactions).

**Figure S19 - Pair-wise intercations results for eticlopride.** Each type of interaction is displayed over all time points for each DR. The DR-subtypes are color-coded. Abbreviations: 2.5 Å – interactions within 2.5 Å; 4 Å – interactions within 4 Å; cat-π – cationic π-interactions; HB – hydrogen bonds; π-π-stack – interactions involving π-π-stacking; SB – salt-bridge; T-stack – aromatic superposition (edge-face-interactions).

**Figure S20 - Pair-wise intercations results for risperidone.** Each type of interaction is displayed over all time points for each DR. The DR-subtypes are color-coded. Abbreviations: 2.5 Å – interactions within 2.5 Å; 4 Å – interactions within 4 Å; cat-π – cationic π-interactions; HB – hydrogen bonds; π-π-stack – interactions involving π-π-stacking; SB – salt-bridge; T-stack – aromatic superposition (edge-face-interactions).

**Figure S21 - Pair-wise intercations results for aripiprazole.** Each type of interaction is displayed over all time points for each DR. The DR-subtypes are color-coded. Abbreviations: 2.5 Å – interactions within 2.5 Å; 4 Å – interactions within 4 Å; cat-π – cationic π-interactions; HB – hydrogen bonds; π-π-stack – interactions involving π-π-stacking; SB – salt-bridge; T-stack – aromatic superposition (edge-face-interactions).

**Figure S22 - Pair-wise intercations results for haloperidole.** Each type of interaction is displayed over all time points for each DR. The DR-subtypes are color-coded. Abbreviations: 2.5 Å – interactions within 2.5 Å; 4 Å – interactions within 4 Å; cat-π – cationic π-interactions; HB – hydrogen bonds; π-π-stack – interactions involving π-π-stacking; SB – salt-bridge; T-stack – aromatic superposition (edge-face-interactions).

**Figure S23 - Pair-wise intercations results for spiperone.** Each type of interaction is displayed over all time points for each DR. The DR-subtypes are color-coded. Abbreviations: 2.5 Å – interactions within 2.5 Å; 4 Å – interactions within 4 Å; cat-π – cationic π-interactions; HB – hydrogen bonds; π-π-stack – interactions involving π-π-stacking; SB – salt-bridge; T-stack – aromatic superposition (edge-face-interactions).

**Figure S24 - Pair-wise intercations results for chlorpromazine.** Each type of interaction is displayed over all time points for each DR. The DR-subtypes are color-coded. Abbreviations: 2.5 Å – interactions within 2.5 Å; 4 Å – interactions within 4 Å; cat-π – cationic π-interactions; HB – hydrogen bonds; π-π-stack – interactions involving π-π-stacking; SB – salt-bridge; T-stack – aromatic superposition (edge-face-interactions).

|  | **D1R** | **D2R** | **D3R** | **D4R** | **D5R** |
| --- | --- | --- | --- | --- | --- |
| Total similarity with the template [%] | 39.5 | 100.0 | 99.3 | 100.0 | 39.1 |
| TM1 | 44.0 | 100.0 | 100.0 | 100.0 | 21.4 |
| TM2 | 60.0 | 100.0 | 100.0 | 100.0 | 54.8 |
| TM3 | 51.5 | 96.7 | 96.7 | 100.0 | 52.9 |
| TM4 | 23.1 | 100.0 | 100.0 | 100.0 | 26.1 |
| TM5 | 36.1 | 92.3 | 100.0 | 97.6 | 29.7 |
| TM6 | 34.5 | 94.6 | 100.0 | 100.0 | 29.7 |
| TM7 | 37.5 | 100.0 | 100.0 | 100.0 | 40.0 |

**Table S1** **- Comparison between the total and transmembrane specific identity [%] of the DR model with their crystal structure templates calculated with Clustal Omega**.

**Table S2 - Summary of the structures used in literature for defining the binding pocket for the D2R and source** (experimental and computational) [2,39,44,47,49,51,99].

| **Reference** | **Ligands** | | **Binding pocket**  **(Experimental data)** | **Flexible residues**  **(Computational data)** |
| --- | --- | --- | --- | --- |
| Tschammer *et al.* | Dopamine |  | Asp86,  Val87,  Ser165,  Ser169,  Trp236,  Phe239,  Phe 240,  His243 |  |
| Haloperidole |  |
| Nemonapride |  |
| Spiperone |  |
| Quinpirole |  |
| 7-Hydroxy-*N*,*N*-dipropyl-2-aminotetralin (7-OH-DPAT) |  |
| FAUC185 |  |
| Floresca *et al.* | Dopamine |  | Ser165,  Ser166,  Ser169,  Trp236,  Phe239,  Phe240,  His243 |  |
| N-Dimethyldopamine |  |
| N-Trimethyldopamine |  |
| N-Dimethylselenodopamine |  |
| N-Dimethylsulfodopamine |  |
| Monomethylsulfoniumdopamine |  |
| Monomethylselemoniumdopamine |  |
| Monomethylsulfoxidedopamine |  |
| Metoclopramine (met-N(et)2) |  |
| Met-N(me)2 |  |
| Met-N+(me)3 |  |
| Met-N+(me)2(et) |  |
| Met-N+(me)(et)2 |  |
| Met-S+(me)2 |  |
|  | Sulpiride N-et |  |
| Sulpiride N+(et)(me) |  |
| Sulpiride N+(et)2 |  |
| Sulpiride S+(et) |  |
| Sulpiride S |  |
| Chlorpromazine (CPZ-N(Me)2) |  |
| CPZ-N+(Me)3 |  |
| CPZ-S+(Me)2 |  |
| *Beta*-Phenylethylamine (PEA) |  |
|  | *Meta-*Tyramine |  |
| *Para*-Tyramine |  |
| Apomorphine |  |
| Norpropylapomorphine/ N-Proplapomorphine |  |
| 6,7-ADTN |  |
| 5,6-ADTN |  |
| Quinpirole |  |
| 7-OH-DPAT |  |
| Spiperidone |  |
| SKF38393 |  |
| SKF82958 |  |
| SCH23390 |  |
| SCH23388 |  |
| Haloperidole |  |
|  | Remoxipride |  |
| Epidipride |  |
| Raclopride |  |
| Domperidone |  |
| (+)-Butaclamol |  |
| Clozapine |  |
| Olanzapine |  |
| Quetiapine |  |
| Ziprasidone |  |
|  | Risperidone |  |
| Durdagi *et al.* | Dopamine |  | Asp86,  Phe239,  Phe240,  Ser165,  Ser166,  Ser169,  His243,  Ile156,  Trp236,  Tyr258,  Tyr266 | Glide/IFD: Asp86, Trp236, Phe240, Tyr266  GOLD:  Asp86, Cys90, Ser165, Ser166, Ser169, Phe170, His243, Tyr258, Thr262, Tyr266 |
| Apomorphine |  |
| Männel *et al.* | 1,4 DAPs  for compounds representing the “fragment” | 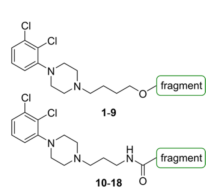 | - Asp86 forming a salt-bridge  - Secondary binding pocket: Glu67,  Ser259,  Tyr258,  Thr262,  Tyr266 |  |
| Kalani *et al.* | Apomorphine |  | Asp86,  Ser165,  Ser169,  Phe82,  Met89,  Cys90,  Phe144,  Phe170,  Val172,  Trp236,  Phe240,  His243 |  |
| Bromocriptine | 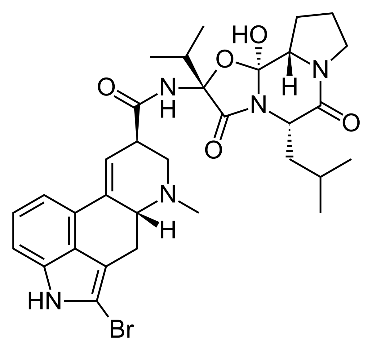 |
| Clozapine |  |
| Domperidone |  |
| Dopamine |  |
| Haloperidole |  |
| Raclopride |  |
| 7-OH-DPAT |  |
| Spiperone |  |
| Sulpiride |  |
| Sukalovic *et al.* | Arylpiperazines  for compounds representing the residues R1, R2 and R3 | 1) To construct the model  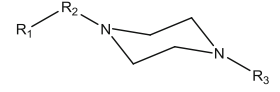  2) To test the model  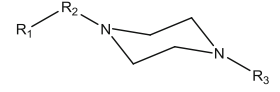  3) To probe the ECL2 area of the model | Asp86,  Ser165,  Ser169,  Phe82,  Met89,  Cys90,  Phe144,  Phe170,  Val172,  Trp236,  Phe240,  His243 | Glide:  Asp86, Ser139, Ser165, Ser169, Phe232, Trp236, Tyr266 |

**Table S3 - Docking results for the D1R**. The lowest binding energy ΔGbind [kcal/mol] of every run was measured using AutoDock4.2. Calculated conformations were clustered and ranked by energy level. A populated cluster indicates, that the position docked into the receptor is more likely to depict the conformational binding position of the ligand. The three best clusters were chosen and analyzed. NA – Not Available; cases were the number of clusters was lower than 3.

| Receptor state of the MD simulation [ns] | Top | 0 | 55 | 60 | 65 | 70 | 75 | 80 | 85 | 90 | 95 | 100 | |
| --- | --- | --- | --- | --- | --- | --- | --- | --- | --- | --- | --- | --- | --- |
| Dopamine | Lowest binding energy [kcal/mol] | | | | | | | | | | | |
| 1 | -10.71 | -10.19 | -9.29 | -10.65 | -9.92 | -11.50 | -10.67 | -10.31 | -10.96 | -10.73 | -9.35 | |
| 2 | -9.56 | -9.63 | -8.64 | -9.45 | -9.42 | -10.67 | -9.81 | -8.93 | -10.80 | -9.91 | -9.21 | |
| 3 | -8.61 | -9.16 | -7.48 | -8.70 | -8.18 | -9.00 | -7.82 | -8.85 | -10.04 | -9.56 | -7.97 | |
| Number of conformations in cluster | | | | | | | | | | | |
| 1 | 64 | 13 | 12 | 18 | 49 | 45 | 68 | 74 | 61 | 19 | 15 |
| 2 | 14 | 17 | 8 | 32 | 29 | 31 | 21 | 7 | 19 | 11 | 27 |
| 3 | 1 | 4 | 5 | 11 | 4 | 5 | 1 | 4 | 2 | 43 | 1 |
| 7-OH-DPAT | Lowest binding energy [kcal/mol] | | | | | | | | | | | |
| 1 | -9.33 | -10.16 | -8.39 | -10.09 | -9.08 | -9.85 | -9.27 | -9.62 | -9.98 | -9.04 | -9.78 |
| 2 | -8.19 | -9.68 | -8.33 | -9.18 | -8.38 | -9.23 | -9.00 | -7.82 | -9.46 | -8.73 | -9.07 |
| 3 | -8.09 | -8.66 | -7.97 | -8.77 | -7.79 | -8.45 | -7.59 | -7.65 | -8.91 | -8.57 | -8.25 |
| Number of conformations in cluster | | | | | | | | | | | |
| 1 | 46 | 13 | 10 | 2 | 13 | 24 | 37 | 55 | 44 | 13 | 10 |
| 2 | 9 | 12 | 14 | 12 | 13 | 14 | 29 | 2 | 10 | 7 | 9 |
| 3 | 18 | 5 | 18 | 2 | 3 | 8 | 5 | 6 | 3 | 9 | 2 |
| Apomorphine | Lowest binding energy [kcal/mol] | | | | | | | | | | | |
| 1 | -10.39 | -10.47 | -9.93 | -10.79 | -10.11 | -11.39 | -10.79 | -10.09 | -10.77 | -10.44 | -9.93 |
| 2 | -9.33 | -8.87 | -9.58 | -10.08 | -9.41 | -11.17 | -10.53 | -9.99 | -9.97 | -9.88 | -8.80 |
| 3 | -8.96 | -8.82 | -8.86 | -9.00 | -9.24 | -9.60 | -9.21 | -8.64 | -9.34 | -8.95 | -8.49 |
| Number of conformations in cluster | | | | | | | | | | | |
| 1 | 64 | 25 | 40 | 33 | 12 | 27 | 29 | 36 | 22 | 44 | 31 |
| 2 | 12 | 11 | 26 | 21 | 37 | 32 | 34 | 20 | 16 | 14 | 6 |
| 3 | 17 | 15 | 6 | 7 | 7 | 5 | 15 | 25 | 6 | 5 | 3 |
| Bromocriptine | Lowest binding energy [kcal/mol] | | | | | | | | | | | |
| 1 | +7.85 | +2.32 | +35.03 | +15.82 | +2.66 | -5.33 | -5.78 | +26.43 | +15.05 | +35.22 | +31.70 |
| 2 | +47.13 | +10.47 | +72.18 | +16.34 | +5.87 | -4.82 | -1.29 | +49.89 | +29.78 | +40.32 | +53.05 |
| 3 | +59.56 | +22.09 | +74.60 | +40.56 | +9.03 | +1.52 | -0.56 | +54.28 | +35.11 | +52.86 | +73.04 |
| Number of conformations in cluster | | | | | | | | | | | |
| 1 | 7 | 51 | 37 | 49 | 33 | 25 | 27 | 10 | 5 | 58 | 25 |
| 2 | 21 | 28 | 22 | 22 | 35 | 28 | 12 | 5 | 46 | 37 | 35 |
| 3 | 34 | 2 | 16 | 5 | 19 | 44 | 7 | 3 | 3 | 3 | 28 |
| Clozapine | Lowest binding energy [kcal/mol] | | | | | | | | | | | |
| 1 | -8.09 | -9.32 | -9.47 | -9.43 | -8.49 | -9.52 | -8.89 | -9.14 | -9.05 | -8.76 | -8.33 |
| 2 | -7.23 | -9.14 | -8.87 | -8.84 | -8.33 | -9.00 | -8.41 | -8.91 | -8.39 | -8.56 | -7.18 |
| 3 | -7.12 | -8.94 | -8.63 | -8.24 | -7.22 | -8.28 | -7.99 | -8.09 | NA | -8.48 | -6.28 |
| Number of conformations in cluster | | | | | | | | | | | |
| 1 | 43 | 36 | 31 | 39 | 80 | 45 | 74 | 14 | 88 | 38 | 84 |
| 2 | 54 | 1 | 50 | 52 | 18 | 2 | 9 | 38 | 12 | 17 | 14 |
| 3 | 2 | 4 | 12 | 9 | 1 | 9 | 13 | 4 | NA | 40 | 1 |
| Nemonapride | Lowest binding energy [kcal/mol] | | | | | | | | | | | |
| 1 | -10.01 | -10.84 | -9.81 | -11.15 | -10.76 | -11.02 | -10.80 | -10.73 | -11.82 | -11.08 | -11.52 |
| 2 | -9.91 | -10.24 | -9.54 | -10.90 | -9.83 | -10.77 | -10.39 | -10.26 | -11.37 | -10.79 | -9,81 |
| 3 | -9.90 | -10.00 | -9.23 | -10.79 | -9.25 | -10.70 | -10.24 | -10.00 | -11.30 | -10.66 | -9.51 |
|  | | | | | | Number of conformations in cluster | | | | | |
| 1 | 15 | 2 | 24 | 5 | 20 | 7 | 6 | 24 | 16 | 13 | 4 |
| 2 | 22 | 15 | 11 | 4 | 16 | 1 | 6 | 13 | 17 | 20 | 2 |
| 3 | 12 | 4 | 13 | 3 | 3 | 3 | 25 | 13 | 17 | 2 | 15 |
| Sulpiride | Lowest binding energy [kcal/mol] | | | | | | | | | | | |
| 1 | -11.43 | -11.73 | -8.76 | -10.55 | -12.51 | -11.38 | -10.88 | -10.87 | -11.64 | -10.43 | -10.95 |
| 2 | -11.24 | -11.25 | -7.61 | -10.22 | -11.16 | -11.07 | -10.68 | -10.70 | -10.30 | -10.43 | -10.76 |
| 3 | -10.73 | -10.67 | -7.36 | -9.98 | -8.85 | -9.06 | -10.13 | -10.15 | -10.01 | -9.29 | -10.35 |
| Number of conformations in cluster | | | | | | | | | | | |
| 1 | 4 | 14 | 5 | 8 | 11 | 8 | 12 | 10 | 6 | 3 | 7 |
| 2 | 3 | 3 | 16 | 14 | 2 | 1 | 4 | 3 | 2 | 3 | 2 |
| 3 | 3 | 2 | 5 | 2 | 3 | 5 | 1 | 2 | 5 | 2 | 4 |
| SCH23390 | Lowest binding energy [kcal/mol] | | | | | | | | | | | |
| 1 | -9.31 | -9.86 | -9.33 | -9.49 | -9.78 | -10.01 | -9.05 | -9.94 | -10.01 | -10.59 | -9.45 |
| 2 | -8.44 | -9.62 | -9.21 | -9.27 | -9.51 | -9.86 | -9.03 | -9.72 | -9.71 | -9.62 | -8.73 |
| 3 | -8.16 | -9.15 | -9.02 | -9.23 | -8.71 | -9.84 | -8.54 | -9.09 | -9.69 | -9.17 | -8.68 |
| Number of conformations in cluster | | | | | | | | | | | |
| 1 | 13 | 2 | 30 | 41 | 39 | 16 | 15 | 4 | 11 | 18 | 5 |
| 2 | 3 | 6 | 29 | 5 | 6 | 5 | 17 | 4 | 5 | 6 | 3 |
| 3 | 1 | 11 | 5 | 6 | 2 | 1 | 3 | 1 | 6 | 3 | 4 |
| SKF38393 | Lowest binding energy [kcal/mol] | | | | | | | | | | | |
| 1 | -12.23 | -11.73 | -8.91 | -10.11 | -11.44 | -13.06 | -11.87 | -12.18 | -12.50 | -12.00 | -11.88 |
| 2 | -11.00 | -9.15 | -8.58 | -9.45 | -9.25 | -11.90 | -11.32 | -10.37 | -11.35 | -11.09 | -9.41 |
| 3 | -9.40 | -9.13 | -8.36 | -9.05 | -9.05 | -8.74 | -9.55 | -8.97 | -9.45 | -10.99 | -9.26 |
| Number of conformations in cluster | | | | | | | | | | | |
| 1 | 38 | 3 | 8 | 6 | 36 | 56 | 32 | 29 | 50 | 16 | 26 |
| 2 | 22 | 6 | 7 | 6 | 1 | 8 | 19 | 17 | 3 | 30 | 4 |
| 3 | 4 | 3 | 9 | 12 | 5 | 3 | 1 | 1 | 9 | 2 | 20 |
| Eticlopride | Lowest binding energy [kcal/mol] | | | | | | | | | | | |
| 1 | -9.65 | -10.53 | -9.39 | -10.99 | -9.85 | -10.47 | -10.06 | -10.61 | -9.67 | -10.15 | -9.75 |
| 2 | -9.57 | -9.56 | -8.69 | -10.52 | -9.26 | -10.34 | -8.88 | -9.61 | -9.61 | -9.82 | -9.66 |
| 3 | -8.43 | -9.37 | -8.44 | -9.73 | -9.19 | -10.04 | -8.82 | -9.51 | -9.14 | -9.18 | -9.29 |
| Number of conformations in cluster | | | | | | | | | | | |
| 1 | 12 | 13 | 10 | 7 | 12 | 2 | 6 | 16 | 16 | 25 | 4 |
| 2 | 2 | 7 | 14 | 29 | 9 | 6 | 3 | 14 | 3 | 23 | 4 |
| 3 | 7 | 8 | 19 | 7 | 1 | 14 | 25 | 3 | 2 | 12 | 14 |
| Risperidone | Lowest binding energy [kcal/mol] | | | | | | | | | | | |
| 1 | -9.17 | -10.19 | -7.51 | -9.12 | -8.50 | -9.96 | -9.60 | -10.35 | -9.72 | -11.60 | -9.66 |
| 2 | -8.29 | -9.42 | -6.36 | -8.82 | -8.16 | -8.98 | -8.62 | -9.11 | -9.40 | -10.48 | -8.71 |
| 3 | -7.62 | -8.90 | -5.11 | -7.91 | -7.95 | -8.02 | -8.40 | -7.08 | -8.78 | -9.31 | -8.70 |
| Number of conformations in cluster | | | | | | | | | | | |
| 1 | 9 | 31 | 6 | 30 | 32 | 32 | 40 | 42 | 31 | 10 | 8 |
| 2 | 27 | 20 | 25 | 19 | 4 | 18 | 3 | 29 | 8 | 28 | 24 |
| 3 | 6 | 5 | 15 | 3 | 7 | 8 | 4 | 3 | 4 | 7 | 6 |
| Aripiprazole | Lowest binding energy [kcal/mol] | | | | | | | | | | | |
| 1 | -10.26 | -11.59 | -10.11 | -11.79 | -10.73 | -9.99 | -10.51 | -10.29 | -11.12 | -9.85 | -10.68 |
| 2 | -9.74 | -11.24 | -8.93 | -10.64 | -10.02 | -9.31 | -9.86 | -10.06 | -10.08 | -8.72 | -9.95 |
| 3 | -9.64 | -10.28 | -8.17 | -9.43 | -9.37 | -9.20 | -9.63 | -9.67 | -9.96 | -8.43 | -9.94 |
| Number of conformations in cluster | | | | | | | | | | | |
| 1 | 8 | 7 | 10 | 5 | 14 | 12 | 6 | 19 | 16 | 29 | 5 |
| 2 | 1 | 3 | 5 | 18 | 1 | 6 | 8 | 1 | 9 | 14 | 9 |
| 3 | 8 | 11 | 11 | 1 | 2 | 2 | 1 | 7 | 3 | 4 | 16 |
| Haloperidole | Lowest binding energy [kcal/mol] | | | | | | | | | | | |
| 1 | -9.84 | -11.35 | -10.73 | -11.68 | -10.58 | -10.65 | -10.55 | -9.87 | -11.19 | -10,93 | -10.47 |
| 2 | -9.81 | -10.99 | -9.68 | -10.87 | -10.21 | -10.50 | -10.49 | -9.52 | -10.08 | -10.58 | -10.15 |
| 3 | -9.33 | -10.91 | -9.64 | -10.61 | -10.10 | -10.50 | -9.73 | -9.51 | -9.90 | -10.51 | -9.60 |
| Number of conformations in cluster | | | | | | | | | | | |
| 1 | 28 | 20 | 42 | 4 | 37 | 4 | 9 | 27 | 32 | 4 | 7 |
| 2 | 6 | 22 | 7 | 31 | 2 | 9 | 5 | 4 | 13 | 5 | 5 |
| 3 | 1 | 9 | 10 | 4 | 8 | 16 | 7 | 3 | 9 | 9 | 7 |
| Spiperone | Lowest binding energy [kcal/mol] | | | | | | | | | | | |
| 1 | -9.70 | -11.12 | -9.30 | -10.93 | -11.09 | -10.37 | -10.76 | -10.56 | -10.76 | -10.81 | -10.35 |
| 2 | -9.31 | -10.95 | -9.23 | -10.46 | -9.99 | -10.03 | -9.97 | -10.33 | -10.71 | -10.10 | -9.93 |
| 3 | -9.02 | -10.56 | -8.99 | -10.05 | -9.81 | -9.75 | -9.81 | -9.50 | -10.48 | -9.77 | -9.63 |
| Number of conformations in cluster | | | | | | | | | | | |
| 1 | 29 | 9 | 8 | 13 | 2 | 1 | 4 | 2 | 11 | 26 | 7 |
| 2 | 14 | 11 | 10 | 7 | 4 | 3 | 8 | 35 | 8 | 4 | 7 |
| 3 | 5 | 4 | 17 | 13 | 9 | 12 | 3 | 10 | 16 | 6 | 10 |
| Chlorpromazine | Lowest binding energy [kcal/mol] | | | | | | | | | | | |
| 1 | -8.10 | -8.70 | -9.19 | -9.04 | -8.92 | -8.93 | -8.02 | -8.06 | -8.68 | -8.91 | -8.82 |
| 2 | -7.98 | -8.55 | -9.00 | -8.87 | -8.39 | -8.70 | -7.94 | -8.01 | -8.67 | -8.75 | -8.51 |
| 3 | -7.92 | -8.52 | -8.95 | -8.79 | -8.35 | -8.59 | -7.92 | -8.00 | -8.63 | -8.72 | -8.43 |
| Number of conformations in cluster | | | | | | | | | | | |
| 1 | 16 | 24 | 14 | 17 | 25 | 24 | 12 | 13 | 5 | 23 | 1 |
| 2 | 9 | 30 | 22 | 2 | 13 | 24 | 22 | 17 | 4 | 26 | 17 |
| 3 | 21 | 4 | 12 | 2 | 4 | 9 | 17 | 8 | 35 | 9 | 19 |

**Table S4 - Docking results for the D2R.** The lowest binding energy ΔGbind [kcal/mol] of every run was measured using AutoDock4.2. Calculated conformations were clustered and ranked by energy level. A populated cluster indicates, that the position docked into the receptor is more likely to depict the conformational binding position of the ligand. The three best clusters were chosen and analyzed.

| **Receptor state of the MD simulation [ns]** | **Top** | **0** | **55** | **60** | **65** | **70** | **75** | **80** | **85** | **90** | **95** | **100** |
| --- | --- | --- | --- | --- | --- | --- | --- | --- | --- | --- | --- | --- |
| Dopamine |  | Lowest binding energy [kcal/mol] | | | | | | | | | | |
| 1 | -9.72 | -9.76 | -9.69 | -9.29 | -9.11 | -9.57 | -9.37 | -8.93 | -9.15 | -10.31 | -9.78 |
| 2 | -9.71 | -9.15 | -9.27 | -9.02 | -9.02 | -9.05 | -8.98 | -8.82 | -8.89 | -9.91 | -9.04 |
| 3 | -8.61 | -8.64 | -8.30 | -8.44 | -8.98 | -8.91 | -8.73 | -8.71 | -8.76 | -8.91 | -8.60 |
|  | Number of conformations in cluster | | | | | | | | | | |
| 1 | 32 | 24 | 19 | 16 | 24 | 23 | 33 | 3 | 15 | 6 | 12 |
| 2 | 29 | 17 | 19 | 32 | 4 | 18 | 20 | 31 | 8 | 26 | 19 |
| 3 | 6 | 20 | 15 | 11 | 8 | 4 | 10 | 10 | 22 | 29 | 13 |
| 7-OH-DPAT |  | Lowest binding energy [kcal/mol] | | | | | | | | | | |
| 1 | -9.26 | -8.16 | -8.30 | -9.02 | -8.46 | -9.26 | -8.59 | -8.08 | -8.92 | -8.37 | -9.30 |
| 2 | -8.28 | -7.99 | -7.85 | -8.72 | -8.34 | -8.34 | -8.31 | -7.33 | -7.76 | -8.25 | -8.31 |
| 3 | -8.06 | -7.98 | -7.73 | -8.59 | -8.25 | -7.93 | -7.89 | -7.06 | -7.50 | -7.86 | -8.21 |
|  | Number of conformations in cluster | | | | | | | | | | |
| 1 | 26 | 8 | 11 | 2 | 17 | 43 | 20 | 8 | 19 | 20 | 21 |
| 2 | 17 | 17 | 10 | 14 | 15 | 6 | 5 | 41 | 13 | 4 | 2 |
| 3 | 14 | 28 | 1 | 6 | 6 | 9 | 5 | 4 | 15 | 16 | 2 |
| Apomorphine |  | Lowest binding energy [kcal/mol] | | | | | | | | | | |
| 1 | -10.05 | -10.21 | -10.28 | -11.38 | -11.09 | -11.10 | -10.03 | -10.31 | -10.61 | -10.82 | -10.44 |
| 2 | -9.62 | -10.04 | -9.88 | -11.31 | -10.03 | -10.22 | -9.97 | -9.71 | -10.35 | -9.69 | -10.10 |
| 3 | -9.60 | -9.76 | -9.41 | -10.72 | -9.68 | -9.78 | -9.36 | -9.15 | -9.51 | -9.51 | -9.82 |
|  |  | | | | | | | | | | |
| 1 | 34 | 16 | 36 | 2 | 5 | 45 | 31 | 14 | 19 | 14 | 12 |
| 2 | 22 | 11 | 10 | 13 | 21 | 15 | 21 | 3 | 4 | 16 | 25 |
| 3 | 25 | 21 | 4 | 7 | 17 | 1 | 7 | 23 | 3 | 23 | 3 |
| Bromocriptine |  | Lowest binding energy [kcal/mol] | | | | | | | | | | |
| 1 | -3.47 | -7.61 | +2.18 | +14.69 | -2.36 | +20.66 | -5.43 | -6.76 | -6.36 | -0.24 | -3.38 |
| 2 | +5.75 | -1.33 | +4.49 | +15.35 | +2.84 | +23.11 | -5.26 | -5.82 | -5.19 | +1.49 | +6.48 |
| 3 | +6.87 | +5.01 | +13.20 | +17.48 | +3.32 | +32.17 | -4.99 | -4.88 | +0.45 | +2.79 | +6.62 |
|  | Number of conformations in cluster | | | | | | | | | | |
| 1 | 13 | 79 | 9 | 14 | 21 | 24 | 7 | 42 | 24 | 25 | 36 |
| 2 | 12 | 2 | 19 | 22 | 16 | 3 | 24 | 7 | 7 | 12 | 2 |
| 3 | 6 | 1 | 8 | 42 | 22 | 1 | 25 | 13 | 3 | 3 | 29 |
| Clozapine |  | Lowest binding energy [kcal/mol] | | | | | | | | | | |
| 1 | -8.10 | -9.20 | -8.50 | -9.39 | -8.66 | -8.54 | -8.71 | -7.44 | -8.88 | -8.75 | -8.19 |
| 2 | -7.59 | -8.12 | -8.14 | -8.81 | -8.56 | -8.54 | -8.68 | -6.70 | -8.28 | -8.45 | -7.96 |
| 3 | -7.42 | -8.09 | -7.47 | -8.34 | -8.34 | -8.44 | -8.24 | -6.00 | -8.25 | -8.16 | -7.37 |
|  | Number of conformations in cluster | | | | | | | | | | |
| 1 | 21 | 66 | 18 | 19 | 26 | 41 | 14 | 27 | 3 | 2 | 1 |
| 2 | 2 | 9 | 40 | 56 | 7 | 4 | 13 | 7 | 2 | 1 | 55 |
| 3 | 55 | 1 | 3 | 3 | 11 | 45 | 18 | 6 | 7 | 5 | 13 |
| Nemonapride |  | Lowest binding energy [kcal/mol] | | | | | | | | | | |
| 1 | -10.10 | -10.56 | -11.39 | -10.08 | -10.58 | -10.32 | -11.11 | -10.72 | -10.23 | -10.45 | -11.86 |
| 2 | -9.43 | -9.92 | -10.04 | -9.79 | -10.30 | -9.88 | -10.64 | -10.60 | -10.00 | -10.35 | -11.17 |
| 3 | -9.34 | -9.60 | -9.79 | -9.73 | -10.30 | -9.80 | -9.98 | -10.43 | -9.97 | -10.08 | -10.62 |
|  | Number of conformations in cluster | | | | | | | | | | |
| 1 | 9 | 3 | 5 | 7 | 6 | 9 | 7 | 5 | 2 | 17 | 5 |
| 2 | 7 | 5 | 2 | 18 | 3 | 8 | 15 | 28 | 3 | 5 | 1 |
| 3 | 7 | 19 | 16 | 7 | 20 | 3 | 2 | 3 | 6 | 1 | 4 |
| Sulpiride |  | Lowest binding energy [kcal/mol] | | | | | | | | | | |
| 1 | -11.39 | -11.20 | -11.35 | -12.39 | -11.39 | -11.63 | -11.90 | -9.41 | -10.98 | -11.51 | -10.44 |
| 2 | -10.43 | -10.74 | -10.95 | -12.10 | -10.25 | -11.22 | -11.20 | -9.09 | -10.18 | -11.48 | -10.16 |
| 3 | -10.23 | -10.44 | -10.41 | -11.72 | -10.11 | -10.90 | -11.07 | -9.06 | -10.14 | -10.94 | -10.11 |
|  | Number of conformations in cluster | | | | | | | | | | |
| 1 | 7 | 1 | 2 | 4 | 1 | 5 | 3 | 4 | 3 | 1 | 9 |
| 2 | 7 | 5 | 2 | 2 | 1 | 1 | 2 | 1 | 3 | 2 | 1 |
| 3 | 2 | 10 | 1 | 4 | 5 | 3 | 2 | 7 | 2 | 1 | 8 |
| SCH23390 |  | Lowest binding energy [kcal/mol] | | | | | | | | | | |
| 1 | -9.60 | -9.06 | -10.05 | -9.93 | -9.91 | -9.49 | -8.83 | -8.50 | -9.98 | -9.87 | -10.17 |
| 2 | -9.36 | -8.89 | -9.31 | -9.81 | -9.89 | -9.39 | -8.75 | -8.34 | -8.89 | -9.74 | -9.86 |
| 3 | -8.81 | -8.50 | -8.80 | -9.07 | -9.76 | -9.28 | -8.58 | -8.17 | -8.77 | -9.39 | -9.73 |
|  | Number of conformations in cluster | | | | | | | | | | |
| 1 | 10 | 10 | 1 | 24 | 1 | 10 | 16 | 53 | 4 | 4 | 8 |
| 2 | 4 | 4 | 17 | 3 | 12 | 12 | 11 | 5 | 5 | 2 | 18 |
| 3 | 4 | 2 | 3 | 6 | 31 | 2 | 19 | 1 | 10 | 6 | 1 |
| SKF38393 |  | Lowest binding energy [kcal/mol] | | | | | | | | | | |
| 1 | -11.35 | -11.98 | -10.73 | -12.33 | -12.41 | -10.38 | -10.35 | -9.36 | -11.13 | -11.02 | -10.81 |
| 2 | -10.04 | -10.48 | -10.07 | -11.26 | -10.12 | -9.74 | -10.18 | -8.89 | -9.99 | -10.34 | -10.79 |
| 3 | -9.85 | -10.29 | -10.06 | -9.92 | -9.90 | -9.62 | -9.75 | -8.63 | -9.96 | -10.04 | -10.00 |
|  | Number of conformations in cluster | | | | | | | | | | |
| 1 | 15 | 14 | 16 | 5 | 55 | 45 | 25 | 29 | 23 | 19 | 8 |
| 2 | 25 | 24 | 14 | 6 | 1 | 4 | 6 | 2 | 11 | 6 | 2 |
| 3 | 1 | 17 | 6 | 4 | 7 | 1 | 27 | 42 | 9 | 4 | 2 |
| Eticlopride |  | Lowest binding energy [kcal/mol] | | | | | | | | | | |
| 1 | -9.33 | -9.52 | -9.37 | -9.87 | -10.44 | -10.08 | -9.19 | -8.67 | -10.61 | -9.88 | -9.36 |
| 2 | -9.22 | -9.31 | -9.22 | -9.62 | -9.95 | -9.93 | -9.04 | -8.66 | -9.61 | -9.01 | -9.20 |
| 3 | -9.10 | -9.30 | -9.02 | -9.54 | -9.53 | -8.89 | -9.00 | -8.04 | -8.59 | -8.82 | -8.88 |
|  | Number of conformations in cluster | | | | | | | | | | |
| 1 | 12 | 15 | 10 | 18 | 6 | 1 | 6 | 2 | 12 | 4 | 1 |
| 2 | 6 | 9 | 5 | 1 | 10 | 22 | 3 | 10 | 5 | 4 | 9 |
| 3 | 2 | 2 | 1 | 4 | 11 | 11 | 6 | 23 | 3 | 6 | 15 |
| Risperidone |  | Lowest binding energy [kcal/mol] | | | | | | | | | | |
| 1 | -10.94 | -11.24 | -11.72 | -14.83 | -11.91 | -11.78 | -11.83 | -10.98 | -11.10 | -10.54 | -12.61 |
| 2 | -10.66 | -10.59 | -10.69 | -12.46 | -11.74 | -10.83 | -11.07 | -10.73 | -10.65 | -10.39 | -11.20 |
| 3 | -10.63 | -9.80 | -10.59 | -11.56 | -11.71 | -10.66 | -10.52 | -10.63 | -10.16 | -10.03 | -10.86 |
|  | Number of conformations in cluster | | | | | | | | | | |
| 1 | 9 | 9 | 18 | 8 | 6 | 14 | 11 | 14 | 10 | 1 | 3 |
| 2 | 2 | 38 | 4 | 17 | 1 | 7 | 2 | 6 | 7 | 2 | 6 |
| 3 | 11 | 10 | 11 | 13 | 8 | 2 | 8 | 2 | 2 | 2 | 2 |
| Aripiprazole |  | Lowest binding energy [kcal/mol] | | | | | | | | | | |
| 1 | -10.77 | -11.08 | -10.87 | -10.87 | -11.17 | -10.54 | -10.27 | -9.34 | -9.96 | -10.95 | -10.74 |
| 2 | -10.60 | -10.51 | -9.85 | -10.76 | -10.70 | -10.10 | -10.13 | -8.29 | -9.50 | -9.31 | -10.05 |
| 3 | -10.30 | -10.50 | -9.48 | -10.59 | -10.66 | -9.68 | -9.65 | -8.12 | -9.25 | -9.01 | -9.52 |
|  | Number of conformations in cluster | | | | | | | | | | |
| 1 | 12 | 7 | 1 | 5 | 4 | 24 | 2 | 1 | 5 | 3 | 3 |
| 2 | 3 | 8 | 3 | 2 | 2 | 3 | 3 | 6 | 3 | 2 | 18 |
| 3 | 3 | 2 | 1 | 6 | 3 | 3 | 3 | 1 | 1 | 2 | 2 |
| Haloperidole |  | Lowest binding energy [kcal/mol] | | | | | | | | | | |
| 1 | -10.66 | -10.84 | -10.84 | -12.69 | -11.13 | -12.52 | -12.06 | -10.62 | -10.23 | -11.73 | -12.02 |
| 2 | -10.41 | -10.03 | -10.06 | -12.09 | -11.10 | -11.23 | -11.21 | -10.19 | -10.23 | -11.45 | -11.69 |
| 3 | -10.39 | -9.98 | -9.95 | -11.82 | -10.53 | -10.75 | -11.08 | -10.12 | -10.18 | -11.32 | -10.52 |
|  | Number of conformations in cluster | | | | | | | | | | |
| 1 | 6 | 20 | 7 | 5 | 7 | 14 | 7 | 8 | 7 | 8 | 11 |
| 2 | 3 | 1 | 7 | 6 | 3 | 6 | 1 | 3 | 1 | 4 | 6 |
| 3 | 8 | 1 | 2 | 11 | 6 | 3 | 4 | 2 | 2 | 2 | 2 |
| Spiperone |  | Lowest binding energy [kcal/mol] | | | | | | | | | | |
| 1 | -10.39 | -11.13 | -10.43 | -11.75 | -10.41 | -10.56 | -10.61 | -8.66 | -10.86 | -10.09 | -10.86 |
| 2 | -10.17 | -10.30 | -10.17 | -10.95 | -10.37 | -10.54 | -10.41 | -8.45 | -9.61 | -10.01 | -10.06 |
| 3 | -10.02 | -9.85 | -10.00 | -10.37 | -10.22 | -10.25 | -9.80 | -8.35 | -9.55 | -9.81 | -9.83 |
|  | Number of conformations in cluster | | | | | | | | | | |
| 1 | 23 | 1 | 3 | 4 | 4 | 2 | 11 | 1 | 4 | 3 | 8 |
| 2 | 7 | 2 | 5 | 6 | 1 | 22 | 4 | 9 | 12 | 4 | 5 |
| 3 | 7 | 1 | 5 | 6 | 1 | 1 | 4 | 6 | 2 | 3 | 1 |
| Chlorpromazine |  | Lowest binding energy [kcal/mol] | | | | | | | | | | |
| 1 | -8.01 | -8.13 | -8.28 | -8.91 | -8.93 | -9.00 | -9.34 | -8.91 | -8.28 | -8.44 | -8.39 |
| 2 | -7.91 | -7.96 | -8.03 | -8.88 | -8.40 | -8.97 | -8.42 | -8.14 | -8.19 | -8.35 | -8.38 |
| 3 | -7.76 | -7.93 | -7.97 | -8.77 | -8.39 | -8.87 | -8.01 | -7.86 | -8.08 | -8.17 | -8.32 |
|  | Number of conformations in cluster | | | | | | | | | | |
| 1 | 2 | 16 | 9 | 6 | 13 | 20 | 2 | 1 | 1 | 1 | 8 |
| 2 | 24 | 16 | 2 | 7 | 2 | 25 | 1 | 3 | 14 | 1 | 8 |
| 3 | 3 | 1 | 11 | 24 | 8 | 2 | 2 | 1 | 2 | 2 | 9 |

**Table S5 - Docking results for the D3R.** The lowest binding energy ΔGbind [kcal/mol] of every run was measured using AutoDock4.2. Calculated conformations were clustered and ranked by energy level. A populated cluster indicates, that the position docked into the receptor is more likely to depict the conformational binding position of the ligand. The three best clusters were chosen and analyzed.

| **Receptor state of the MD simulation [ns]** | **Top** | **0** | **55** | **60** | **65** | **70** | **75** | **80** | **85** | **90** | **95** | **100** |
| --- | --- | --- | --- | --- | --- | --- | --- | --- | --- | --- | --- | --- |
| Dopamine |  | Lowest binding energy [kcal/mol] | | | | | | | | | | |
| 1 | -9.76 | -9.63 | -8.92 | -9.34 | -8.97 | -8.75 | -9.88 | -9.87 | -9.77 | -9.51 | -8.86 |
| 2 | -9.55 | -9.48 | -8.67 | -8.79 | -8.95 | -8.72 | -9.59 | -8.81 | -9.00 | -8.79 | -8.72 |
| 3 | -8.64 | -8.64 | -8.49 | -8.34 | -8.27 | -8.18 | -8.82 | -8.26 | -8.18 | -7.96 | -8.07 |
|  | Number of conformations in cluster | | | | | | | | | | |
| 1 | 17 | 42 | 14 | 34 | 23 | 35 | 69 | 56 | 40 | 43 | 8 |
| 2 | 47 | 17 | 22 | 11 | 27 | 12 | 5 | 6 | 7 | 11 | 29 |
| 3 | 18 | 16 | 2 | 15 | 10 | 11 | 12 | 6 | 12 | 6 | 12 |
| 7-OH-DPAT |  | Lowest binding energy [kcal/mol] | | | | | | | | | | |
| 1 | -9.11 | -8.35 | -8.43 | -9.43 | -8.37 | -9.47 | -9.75 | -8.20 | -8.36 | -9.38 | -8.57 |
| 2 | -8.89 | -7.99 | -7.56 | -7.67 | -7.70 | -8.53 | -8.93 | -8.02 | -8.07 | -8.91 | -8.21 |
| 3 | -8.52 | -7.60 | -7.53 | -7.61 | -7.54 | -8.29 | -7.92 | -7.55 | -7.87 | -7.83 | -7.85 |
|  | Number of conformations in cluster | | | | | | | | | | |
| 1 | 5 | 46 | 35 | 29 | 39 | 20 | 28 | 35 | 41 | 13 | 8 |
| 2 | 51 | 4 | 34 | 3 | 12 | 7 | 20 | 12 | 5 | 3 | 9 |
| 3 | 1 | 12 | 1 | 5 | 4 | 5 | 3 | 1 | 3 | 4 | 8 |
| Apomorphine |  | Lowest binding energy [kcal/mol] | | | | | | | | | | |
| 1 | -9.89 | -10.19 | -9.40 | -10.18 | -9.28 | -9.51 | -10.52 | -9.91 | -10.11 | -9.40 | -9.87 |
| 2 | -9.81 | -9.46 | -9.02 | -9.34 | -8.93 | -9.33 | -9.64 | -9.46 | -9.68 | -9.17 | -9.28 |
| 3 | -9.81 | -8.51 | -8.45 | -8.75 | -8.75 | -8.97 | -9.42 | -9.26 | -9.18 | -9.12 | -9.13 |
|  | Number of conformations in cluster | | | | | | | | | | |
| 1 | 36 | 2 | 28 | 22 | 18 | 1 | 3 | 9 | 27 | 10 | 23 |
| 2 | 22 | 38 | 25 | 33 | 22 | 11 | 31 | 22 | 13 | 31 | 19 |
| 3 | 14 | 21 | 10 | 2 | 2 | 15 | 16 | 3 | 23 | 24 | 2 |
| Bromocriptine |  | Lowest binding energy [kcal/mol] | | | | | | | | | | |
| 1 | -2.28 | +29.67 | +33.62 | +10.12 | +23.21 | +10.12 | +19.76 | +1.48 | +11.26 | +42.39 | +4.31 |
| 2 | +13.56 | +81.44 | +34.66 | +11.36 | +24.67 | +10.32 | +34.46 | +10.88 | +20.50 | +61.90 | +23.94 |
| 3 | +16.35 | +100.91 | +36.66 | +22.89 | +28.29 | +15.51 | +52.78 | +26.06 | +23.50 | +80.64 | +43.10 |
|  | Number of conformations in cluster | | | | | | | | | | |
| 1 | 73 | 5 | 3 | 18 | 2 | 13 | 2 | 27 | 17 | 19 | 34 |
| 2 | 4 | 8 | 4 | 12 | 5 | 22 | 2 | 27 | 6 | 9 | 2 |
| 3 | 1 | 1 | 2 | 7 | 11 | 3 | 27 | 1 | 7 | 20 | 3 |
| Clozapine |  | Lowest binding energy [kcal/mol] | | | | | | | | | | |
| 1 | -8.48 | -7.16 | -8.72 | -8.12 | -8.36 | -8.16 | -9.15 | -8.33 | -8.49 | -8.37 | -8.51 |
| 2 | -8.43 | -7.12 | -7.23 | -7.27 | -7.47 | -7.69 | -7.90 | -7.29 | -8.08 | -8.37 | -8.46 |
| 3 | -8.20 | -6.95 | -7.22 | -7.26 | -7.38 | -7.65 | -7.85 | -7.24 | -7.85 | -8.19 | -7.90 |
|  | Number of conformations in cluster | | | | | | | | | | |
| 1 | 13 | 6 | 17 | 14 | 25 | 9 | 40 | 25 | 2 | 49 | 21 |
| 2 | 7 | 38 | 11 | 24 | 14 | 1 | 12 | 31 | 6 | 17 | 7 |
| 3 | 8 | 49 | 8 | 32 | 12 | 7 | 7 | 4 | 36 | 17 | 3 |
| Nemonapride |  | Lowest binding energy [kcal/mol] | | | | | | | | | | |
| 1 | -10.97 | -10.63 | -9.12 | -10.00 | -9.91 | -9.85 | -10.17 | -9.89 | -9.94 | -10.09 | -10.01 |
| 2 | -10.86 | -10.23 | -8.92 | -9.85 | -9.48 | -9.53 | -9.82 | -9.66 | -9.59 | -10.00 | -9.71 |
| 3 | -10.26 | -9.96 | -8.68 | -9.40 | -9.12 | -9.45 | -9.71 | -9.59 | -9.32 | -9.90 | -9.55 |
|  | Number of conformations in cluster | | | | | | | | | | |
| 1 | 2 | 4 | 1 | 1 | 12 | 1 | 2 | 8 | 5 | 1 | 5 |
| 2 | 3 | 1 | 4 | 3 | 3 | 5 | 2 | 6 | 2 | 19 | 2 |
| 3 | 1 | 2 | 2 | 2 | 1 | 2 | 2 | 1 | 4 | 3 | 6 |
| Sulpiride |  | Lowest binding energy [kcal/mol] | | | | | | | | | | |
| 1 | -10.55 | -9.69 | -9.77 | -8.93 | -9.30 | -9.94 | -10.24 | -10.01 | -9.73 | -9.99 | -10.55 |
| 2 | -10.25 | -8.90 | -9.41 | -8.91 | -8.86 | -9.84 | -9.63 | -9.78 | -8.85 | -9.46 | -9.81 |
| 3 | -9.59 | -8.89 | -8.44 | -8.85 | -8.70 | -9.68 | -9.34 | -9.71 | -8.55 | -9.17 | -9.79 |
|  | Number of conformations in cluster | | | | | | | | | | |
| 1 | 12 | 1 | 1 | 2 | 3 | 2 | 4 | 2 | 4 | 1 | 3 |
| 2 | 6 | 7 | 1 | 1 | 3 | 2 | 4 | 2 | 2 | 19 | 1 |
| 3 | 7 | 1 | 4 | 2 | 3 | 3 | 3 | 2 | 1 | 7 | 12 |
| SCH23390 |  | Lowest binding energy [kcal/mol] | | | | | | | | | | |
| 1 | -10.59 | -9.38 | -8.64 | -9.96 | -10.13 | -9.76 | -10.34 | -9.59 | -10.39 | -10.71 | -9.72 |
| 2 | -9.69 | -9.07 | -8.33 | -9.65 | -9.72 | -9.19 | -9.64 | -9.16 | -9.81 | -10.00 | -9.68 |
| 3 | -9.56 | -8.70 | -8.21 | -8.98 | -9.47 | -9.03 | -9.44 | -8.64 | -8.71 | -9.71 | -9.41 |
|  | Number of conformations in cluster | | | | | | | | | | |
| 1 | 11 | 30 | 10 | 3 | 31 | 1 | 11 | 5 | 9 | 28 | 2 |
| 2 | 2 | 12 | 1 | 9 | 5 | 8 | 30 | 20 | 30 | 9 | 23 |
| 3 | 6 | 10 | 28 | 30 | 2 | 5 | 19 | 39 | 36 | 2 | 2 |
| SKF38393 |  | Lowest binding energy [kcal/mol] | | | | | | | | | | |
| 1 | -11.68 | -10.68 | -9.36 | -11.04 | -11.53 | -10.47 | -11.15 | -10.41 | -10.85 | -10.69 | -10.08 |
| 2 | -11.34 | -10.28 | -9.33 | -10.88 | -10.24 | -10.30 | -10.69 | -10.35 | -10.69 | -10.24 | -9.74 |
| 3 | -11.08 | -10.23 | -9.25 | -10.83 | -10.15 | -9.66 | -9.95 | -9.87 | -10.07 | -9.78 | -9.63 |
|  | Number of conformations in cluster | | | | | | | | | | |
| 1 | 1 | 20 | 30 | 21 | 12 | 23 | 16 | 58 | 31 | 9 | 26 |
| 2 | 36 | 9 | 6 | 5 | 8 | 22 | 56 | 5 | 20 | 1 | 2 |
| 3 | 2 | 32 | 4 | 23 | 8 | 1 | 2 | 2 | 8 | 7 | 2 |
| Eticlopride |  | Lowest binding energy [kcal/mol] | | | | | | | | | | |
| 1 | -9.98 | -8.71 | -7.99 | -9.04 | -9.45 | -9.36 | -9.58 | -9.19 | -9.41 | -9.85 | -9.23 |
| 2 | -9.34 | -8.69 | -7.95 | -8.90 | -9.02 | -8.81 | -9.10 | -8.99 | -9.37 | -9.47 | -9.17 |
| 3 | -9.07 | -8.64 | -7.88 | -8.80 | -8.76 | -8.79 | -8.83 | -8.92 | -9.20 | -9.43 | -9.03 |
|  | Number of conformations in cluster | | | | | | | | | | |
| 1 | 14 | 31 | 7 | 9 | 7 | 5 | 1 | 9 | 2 | 7 | 6 |
| 2 | 2 | 5 | 2 | 12 | 8 | 5 | 10 | 12 | 15 | 27 | 5 |
| 3 | 13 | 2 | 2 | 12 | 2 | 17 | 2 | 9 | 8 | 17 | 3 |
| Risperidone |  | Lowest binding energy [kcal/mol] | | | | | | | | | | |
| 1 | -8.87 | -8.09 | -7.91 | -8.88 | -8.67 | -9.59 | -9.44 | -9.46 | -9.51 | -9.11 | -9.72 |
| 2 | -8.23 | -7.76 | -7.77 | -8.71 | -7.89 | -9.43 | -9.14 | -9.06 | -9.48 | -9.05 | -9.47 |
| 3 | -8.17 | -7.73 | -7.73 | -8.61 | -7.87 | -9.07 | -9.09 | -8.93 | -9.37 | -9.03 | -8.86 |
|  | Number of conformations in cluster | | | | | | | | | | |
| 1 | 16 | 1 | 6 | 2 | 12 | 7 | 2 | 15 | 12 | 7 | 5 |
| 2 | 5 | 23 | 3 | 1 | 4 | 12 | 4 | 1 | 1 | 5 | 4 |
| 3 | 2 | 2 | 3 | 4 | 1 | 4 | 9 | 15 | 7 | 10 | 11 |
| Aripiprazole |  | Lowest binding energy [kcal/mol] | | | | | | | | | | |
| 1 | -10.40 | -8.59 | -8.89 | -8.97 | -9.79 | -10.13 | -10.37 | -9.24 | -9.74 | -10.34 | -10.44 |
| 2 | -10.27 | -8.24 | -8.66 | -8.96 | -9.25 | -9.33 | -10.30 | -8.95 | -9.45 | -10.22 | -9.61 |
| 3 | -9.99 | -8.23 | -8.45 | -8.86 | -8.97 | -9.10 | -10.19 | -8.94 | -9.27 | -10.16 | -9.59 |
|  | Number of conformations in cluster | | | | | | | | | | |
| 1 | 3 | 3 | 1 | 1 | 3 | 2 | 5 | 12 | 5 | 4 | 8 |
| 2 | 4 | 3 | 1 | 1 | 1 | 1 | 3 | 3 | 1 | 12 | 2 |
| 3 | 2 | 2 | 1 | 1 | 2 | 2 | 5 | 3 | 1 | 4 | 3 |
| Haloperidole |  | Lowest binding energy [kcal/mol] | | | | | | | | | | |
| 1 | -11.07 | -11.00 | -10.36 | -10.89 | -9.68 | -10.26 | -11.88 | -10.84 | -10.31 | -10.67 | -10.43 |
| 2 | -10.63 | -10.79 | -9.44 | -9.45 | -9.50 | -10.21 | -11.20 | -10.35 | -10.28 | -10.50 | -10.30 |
| 3 | -10.24 | -10.01 | -9.21 | -9.42 | -9.30 | -10.18 | -10.57 | -10.34 | -10.23 | -10.38 | -10.12 |
|  | Number of conformations in cluster | | | | | | | | | | |
| 1 | 3 | 1 | 1 | 1 | 1 | 2 | 1 | 1 | 3 | 2 | 18 |
| 2 | 2 | 1 | 1 | 3 | 5 | 3 | 5 | 5 | 3 | 6 | 1 |
| 3 | 2 | 1 | 3 | 2 | 5 | 3 | 1 | 1 | 1 | 5 | 5 |
| Spiperone |  | Lowest binding energy [kcal/mol] | | | | | | | | | | |
| 1 | -9.29 | -9.25 | -8.75 | -8.88 | -9.38 | -9.50 | -9.50 | -8.75 | -9.12 | -9.38 | -9.50 |
| 2 | -8.67 | -9.00 | -7.88 | -8.75 | -9.00 | -8.75 | -9.38 | -8.62 | -9.00 | -9.38 | -9.25 |
| 3 | -8.58 | -8.75 | -7.88 | -8.50 | -8.88 | -8.62 | -9.38 | -8.62 | -8.75 | -9.12 | -9.12 |
|  | Number of conformations in cluster | | | | | | | | | | |
| 1 | 4 | 2 | 3 | 3 | 1 | 1 | 5 | 2 | 1 | 15 | 2 |
| 2 | 3 | 3 | 1 | 1 | 1 | 2 | 1 | 2 | 3 | 1 | 9 |
| 3 | 2 | 2 | 3 | 1 | 1 | 1 | 7 | 4 | 1 | 14 | 1 |
| Chlorpromazine |  | Lowest binding energy [kcal/mol] | | | | | | | | | | |
| 1 | -8.29 | -7.88 | -8.03 | -7.79 | -7.89 | -8.91 | -8.63 | -7.61 | -8.06 | -8.56 | -8.74 |
| 2 | -8.28 | -7.81 | -7.69 | -7.71 | -7.64 | -8.33 | -8.38 | -7.30 | -7.60 | -8.17 | -7.95 |
| 3 | -8.27 | -7.81 | -7.51 | -7.63 | -7.49 | -8.06 | -7.98 | -7.13 | -7.56 | -8.16 | -7.81 |
|  | Number of conformations in cluster | | | | | | | | | | |
| 1 | 26 | 2 | 1 | 5 | 1 | 1 | 5 | 5 | 7 | 23 | 2 |
| 2 | 10 | 11 | 14 | 30 | 7 | 2 | 18 | 5 | 7 | 9 | 5 |
| 3 | 14 | 1 | 1 | 24 | 2 | 21 | 4 | 3 | 18 | 3 | 10 |

**Table S6 - Docking results for the D4R.** The lowest binding energy ΔGbind [kcal/mol] of every run was measured using AutoDock4.2. Calculated conformations were clustered and ranked by energy level. A populated cluster indicates, that the position docked into the receptor is more likely to depict the conformational binding position of the ligand. The three best clusters were chosen and analyzed. NA – Not Available; cases were the number of clusters was lower than 3.

| Receptor state of the MD simulation [ns] | Top | 0 | 55 | 60 | 65 | 70 | 75 | 80 | 85 | 90 | 95 | 100 |
| --- | --- | --- | --- | --- | --- | --- | --- | --- | --- | --- | --- | --- |
| Dopamine |  | Lowest binding energy [kcal/mol] | | | | | | | | | | |
| 1 | -10.04 | -9.84 | -9.60 | -9.99 | -10.09 | -9.78 | -9.41 | -8.53 | -7.52 | -9.87 | -9.29 |
| 2 | -9.54 | -8,68 | -8.96 | -9.60 | -9.45 | -8.16 | -9.23 | -7.81 | -7.45 | -7.41 | -9.11 |
| 3 | -9.40 | -7.75 | -8.68 | -8.36 | -8.80 | -7.71 | -9.06 | -6.95 | -7.16 | -6.99 | -7.79 |
|  | Number of conformations in cluster | | | | | | | | | | |
| 1 | 69 | 62 | 60 | 39 | 62 | 68 | 41 | 39 | 30 | 86 | 13 |
| 2 | 15 | 28 | 19 | 21 | 10 | 6 | 17 | 13 | 30 | 5 | 55 |
| 3 | 8 | 1 | 3 | 8 | 9 | 4 | 7 | 2 | 8 | 2 | 8 |
| 7-OH-DPAT |  | Lowest binding energy [kcal/mol] | | | | | | | | | | |
| 1 | -9.52 | -7.75 | -8.28 | -8.32 | -8.74 | -9.25 | -8.98 | -7.46 | -7.56 | -9.62 | -8.83 |
| 2 | -8.44 | -7.68 | -7.97 | -7.82 | -8.25 | -8.70 | -8.45 | -7.05 | -7.60 | -9.41 | -8.17 |
| 3 | -7.8 | -7.52 | -7.71 | -7.71 | -8.17 | -8.46 | -7.54 | -6.53 | -7.50 | -7.38 | -8.04 |
|  | Number of conformations in cluster | | | | | | | | | | |
| 1 | 30 | 11 | 13 | 5 | 13 | 14 | 6 | 42 | 11 | 15 | 23 |
| 2 | 19 | 20 | 3 | 1 | 10 | 10 | 13 | 9 | 48 | 3 | 1 |
| 3 | 17 | 20 | 1 | 27 | 1 | 7 | 26 | 4 | 16 | 55 | 2 |
| Apomorphine |  | Lowest binding energy [kcal/mol] | | | | | | | | | | |
| 1 | -9.24 | -10.33 | -9.48 | -10.11 | -10.19 | -9.92 | -10.08 | -8.41 | -9.26 | -9.91 | -10.10 |
| 2 | -9.05 | -9.69 | -9.09 | -9.59 | -9.50 | -9.83 | -9.72 | -8.09 | -8.98 | -9.86 | -10.01 |
| 3 | -8.94 | -9.51 | -8.25 | -9.27 | -9.32 | -8.77 | -9.56 | 7-82 | -8.72 | -7.77 | -9.30 |
|  | Number of conformations in cluster | | | | | | | | | | |
| 1 | 34 | 44 | 13 | 27 | 28 | 2 | 2 | 12 | 7 | 8 | 10 |
| 2 | 16 | 19 | 39 | 7 | 40 | 51 | 5 | 1 | 21 | 7 | 19 |
| 3 | 9 | 31 | 1 | 42 | 10 | 35 | 13 | 41 | 4 | 51 | 2 |
| Bromocriptine |  | Lowest binding energy [kcal/mol] | | | | | | | | | | |
| 1 | +103.73 | +34.39 | +43.40 | +138.76 | +154.29 | +65.12 | +35.85 | +87.57 | +133.51 | +238.63 | +57.61 |
| 2 | +142.07 | +39.22 | +73.40 | +139.02 | +162.10 | +127.27 | +79.19 | +129.02 | +156.83 | +240.75 | +69.87 |
| 3 | +198.99 | +49.74 | +88.72 | +169.12 | +176.68 | +141.46 | +95.36 | +161.26 | +158.24 | +250.54 | +113.81 |
|  | Number of conformations in cluster | | | | | | | | | | |
| 1 | 12 | 38 | 45 | 57 | 4 | 36 | 22 | 26 | 23 | 5 | 58 |
| 2 | 18 | 32 | 15 | 10 | 51 | 1 | 2 | 1 | 18 | 11 | 10 |
| 3 | 3 | 3 | 21 | 8 | 2 | 6 | 9 | 54 | 8 | 8 | 4 |
| Clozapine |  | Lowest binding energy [kcal/mol] | | | | | | | | | | |
| 1 | -7.73 | -7.05 | -7.12 | -7.95 | -7.64 | -6.04 | -8.96 | -4.70 | -5.20 | -1.03 | -6.09 |
| 2 | -7.44 | -7.05 | -7.06 | -7.17 | -6.25 | -4.27 | -6.58 | -2.40 | -3.52 | -0.72 | -3.17 |
| 3 | -6.75 | -6.96 | -6.47 | -6.76 | -6.04 | -1.84 | -4.58 | -0.68 | -3.46 | +1.59 | -2.93 |
|  | Number of conformations in cluster | | | | | | | | | | |
| 1 | 59 | 50 | 8 | 11 | 38 | 49 | 65 | 27 | 15 | 8 | 58 |
| 2 | 2 | 6 | 13 | 22 | 2 | 27 | 13 | 40 | 14 | 44 | 1 |
| 3 | 13 | 17 | 21 | 45 | 31 | 7 | 7 | 3 | 5 | 4 | 4 |
| Nemonapride |  | Lowest binding energy [kcal/mol] | | | | | | | | | | |
| 1 | -10.46 | -9.12 | -10.45 | -10.09 | -10.68 | -10.89 | -9.92 | -9.84 | -10.48 | -9.59 | -10.62 |
| 2 | -9.85 | -9.07 | -9.31 | -9.98 | -9.50 | -10.41 | -9.12 | -8.77 | -10.15 | -9.53 | -10.26 |
| 3 | -9.50 | -9.07 | -9.08 | -9.55 | -9.45 | -10.29 | -8,.93 | -7.71 | -9.53 | -8.34 | -9.86 |
|  | Number of conformations in cluster | | | | | | | | | | |
| 1 | 10 | 15 | 1 | 1 | 5 | 20 | 23 | 12 | 25 | 19 | 7 |
| 2 | 3 | 14 | 7 | 1 | 1 | 17 | 15 | 16 | 25 | 16 | 8 |
| 3 | 15 | 12 | 3 | 3 | 4 | 1 | 7 | 6 | 18 | 12 | 1 |
| Sulpiride |  | Lowest binding energy [kcal/mol] | | | | | | | | | | |
| 1 | -10.62 | -10.20 | -11.12 | -10.65 | -12.10 | -11.36 | -9.20 | -8.98 | -10.71 | -10.53 | -12.14 |
| 2 | -10.43 | -9.83 | -10.71 | -10.23 | -11.06 | -11.08 | -8.39 | -8.63 | -10.49 | -10.48 | -11.29 |
| 3 | -9.59 | -9.52 | -10.25 | -10.08 | -11.06 | -10.91 | -8.35 | -8.33 | -10.28 | -9.97 | -10.26 |
|  | Number of conformations in cluster | | | | | | | | | | |
| 1 | 14 | 4 | 6 | 6 | 1 | 7 | 2 | 2 | 2 | 6 | 1 |
| 2 | 1 | 5 | 5 | 8 | 4 | 4 | 7 | 5 | 2 | 6 | 4 |
| 3 | 2 | 7 | 1 | 1 | 2 | 4 | 10 | 1 | 6 | 5 | 3 |
| SCH23390 |  | Lowest binding energy [kcal/mol] | | | | | | | | | | |
| 1 | -9.69 | -7.15 | -9.50 | -9.45 | -9.71 | -10.84 | -8.93 | -9.93 | -8.92 | -8.52 | -9.60 |
| 2 | -9.38 | -6.89 | -9.37 | -9.43 | -8.85 | -9.47 | -8.50 | -8.98 | -8.75 | -8.25 | -8.81 |
| 3 | -9.22 | -6.74 | -9.04 | -9.02 | -8.42 | -9.20 | -8.50 | -8.41 | -8.50 | -8.23 | -8.64 |
|  | Number of conformations in cluster | | | | | | | | | | |
| 1 | 45 | 20 | 11 | 11 | 27 | 28 | 6 | 27 | 71 | 33 | 7 |
| 2 | 17 | 4 | 4 | 6 | 46 | 2 | 9 | 10 | 2 | 22 | 2 |
| 3 | 26 | 5 | 14 | 18 | 8 | 3 | 12 | 5 | 22 | 11 | 18 |
| SKF38393 |  | Lowest binding energy [kcal/mol] | | | | | | | | | | |
| 1 | -10.94 | -9.93 | -11.02 | -10.82 | -11.87 | -10.18 | -10.17 | -9.16 | -10.16 | -9.62 | -10.67 |
| 2 | -10.19 | -9.70 | -9.87 | -10.72 | -9.90 | -9.63 | -10.10 | -8.99 | -9.66 | -9.01 | -10.58 |
| 3 | -9.48 | -9.60 | -9.76 | -10.36 | -9.17 | -9.38 | -9.35 | -8.60 | -8.94 | -8.68 | -10.28 |
|  | Number of conformations in cluster | | | | | | | | | | |
| 1 | 14 | 29 | 4 | 42 | 19 | 13 | 5 | 45 | 1 | 31 | 3 |
| 2 | 9 | 14 | 21 | 3 | 17 | 17 | 3 | 16 | 30 | 30 | 12 |
| 3 | 3 | 1 | 7 | 9 | 2 | 3 | 7 | 8 | 3 | 4 | 2 |
| Eticlopride |  | Lowest binding energy [kcal/mol] | | | | | | | | | | |
| 1 | -9.60 | -7.73 | -8.55 | -9.53 | -10.50 | -9.78 | -9.57 | -9.10 | -9.58 | -8.34 | -9.02 |
| 2 | -9.38 | -7.70 | -8.48 | -9.23 | -9.73 | -9.53 | -7.77 | -7.24 | -9.48 | -8.09 | -8.71 |
| 3 | -8.64 | -7.68 | -8.36 | -9.20 | -9.42 | -9.44 | -7.49 | -6.86 | -8.90 | -8.08 | -8.63 |
|  | Number of conformations in cluster | | | | | | | | | | |
| 1 | 20 | 9 | 11 | 2 | 3 | 32 | 46 | 24 | 6 | 10 | 7 |
| 2 | 8 | 8 | 9 | 11 | 1 | 6 | 5 | 13 | 23 | 2 | 2 |
| 3 | 13 | 1 | 4 | 9 | 7 | 10 | 4 | 6 | 29 | 28 | 4 |
| Risperidone |  | Lowest binding energy [kcal/mol] | | | | | | | | | | |
| 1 | -8.30 | -9.60 | -9.16 | -7.80 | -8.25 | -4.64 | -6.17 | -1.21 | -5.83 | -4.65 | -7.74 |
| 2 | -8.27 | -9.45 | -9.04 | -6.79 | -8.04 | -2.42 | -6.13 | +0.50 | -5.57 | -4.63 | -7.20 |
| 3 | -7.08 | -8.23 | -8.93 | -5.45 | -7.86 | -2.31 | -3.76 | +0.51 | -5.42 | -2.60 | -6.97 |
|  | Number of conformations in cluster | | | | | | | | | | |
| 1 | 12 | 37 | 1 | 28 | 10 | 14 | 9 | 12 | 20 | 14 | 2 |
| 2 | 18 | 1 | 6 | 14 | 14 | 3 | 17 | 5 | 12 | 6 | 6 |
| 3 | 11 | 2 | 6 | 3 | 2 | 1 | 17 | 10 | 2 | 8 | 10 |
| Aripiprazole |  | Lowest binding energy [kcal/mol] | | | | | | | | | | |
| 1 | -8.92 | -11.08 | -8.05 | -11.43 | -12.23 | -7.46 | -4.70 | -1.97 | -7.60 | -8.30 | -9.26 |
| 2 | -8.86 | -9.85 | -7.53 | -10.35 | -9.26 | -4.85 | -4.05 | -1.45 | -7.05 | -7.83 | -8.92 |
| 3 | -8.10 | -9.44 | -7.28 | -10.34 | -9.08 | -4.65 | -3.83 | -0.97 | -6.73 | -6.55 | -7.75 |
|  | Number of conformations in cluster | | | | | | | | | | |
| 1 | 2 | 6 | 2 | 6 | 12 | 10 | 7 | 14 | 9 | 6 | 2 |
| 2 | 11 | 1 | 9 | 33 | 2 | 2 | 2 | 4 | 3 | 5 | 20 |
| 3 | 6 | 3 | 2 | 3 | 4 | 3 | 4 | 5 | 2 | 11 | 8 |
| Haloperidole |  | Lowest binding energy [kcal/mol] | | | | | | | | | | |
| 1 | -9.41 | -0.40 | -10.32 | -9.16 | -10.42 | -6.29 | -1.94 | +5.37 | -0.35 | -4.67 | -9.18 |
| 2 | -8.26 | +0.88 | -9.66 | -8.32 | -9.36 | -6.08 | -1.34 | +5.41 | +0.12 | -1.78 | -8.73 |
| 3 | NA | +2.57 | -9.36 | -8.08 | -8.98 | -5.94 | -0.80 | +6.89 | +0.56 | -1.14 | -8.55 |
|  | Number of conformations in cluster | | | | | | | | | | |
| 1 | 33 | 69 | 2 | 58 | 58 | 6 | 30 | 29 | 9 | 35 | 21 |
| 2 | 67 | 13 | 7 | 16 | 13 | 18 | 25 | 1 | 20 | 20 | 7 |
| 3 | NA | 6 | 60 | 15 | 21 | 13 | 2 | 6 | 6 | 2 | 28 |
| Spiperone |  | Lowest binding energy [kcal/mol] | | | | | | | | | | |
| 1 | -9.02 | -9.64 | -10.16 | -10.23 | -9.16 | -9.99 | -8.91 | -7.42 | -10.27 | -9.93 | -11.67 |
| 2 | -8.79 | -9.02 | -9.36 | -9.72 | -9.05 | -8.42 | -8.29 | -6.50 | -10.17 | -9.05 | -11.37 |
| 3 | -8.45 | -9.01 | -9.11 | -9.40 | -8.59 | -7.20 | -8.05 | -6.26 | -9,85 | -8.49 | -11.14 |
|  | Number of conformations in cluster | | | | | | | | | | |
| 1 | 1 | 9 | 24 | 17 | 5 | 4 | 6 | 5 | 19 | 14 | 10 |
| 2 | 16 | 10 | 1 | 16 | 2 | 16 | 12 | 9 | 35 | 3 | 20 |
| 3 | 1 | 15 | 12 | 3 | 26 | 11 | 9 | 6 | 4 | 9 | 18 |
| Chlorpromazine |  | Lowest binding energy [kcal/mol] | | | | | | | | | | |
| 1 | -8.55 | -7.88 | -8.24 | -8.60 | -9.09 | -8.91 | -8.08 | -8.20 | -8.44 | -8.24 | -9.16 |
| 2 | -8.42 | -7.82 | -8.09 | -8.40 | -9.00 | -8.66 | -8.00 | -7.78 | -8.35 | -7.80 | -8.64 |
| 3 | -7.80 | -7.75 | -8.02 | -8.36 | -8.84 | -8.42 | -7.53 | -7.56 | -8.35 | -7.26 | -8.30 |
|  | Number of conformations in cluster | | | | | | | | | | |
| 1 | 5 | 24 | 8 | 11 | 10 | 6 | 3 | 1 | 3 | 30 | 1 |
| 2 | 12 | 14 | 22 | 36 | 12 | 8 | 35 | 25 | 11 | 6 | 5 |
| 3 | 16 | 3 | 22 | 7 | 10 | 7 | 14 | 11 | 5 | 9 | 6 |

**Table S7 - Docking results for the D5R**. The lowest binding energy ΔGbind [kcal/mol] of every run was measured using AutoDock4.2. Calculated conformations were clustered and ranked by energy level. A populated cluster indicates, that the position docked into the receptor is more likely to depict the conformational binding position of the ligand. The three best clusters were chosen and analyzed.

| Receptor state of the MD simulation [ns] | Top | 0 | 55 | 60 | 65 | 70 | 75 | 80 | 85 | 90 | 95 | 100 |
| --- | --- | --- | --- | --- | --- | --- | --- | --- | --- | --- | --- | --- |
| Dopamine |  | Lowest binding energy [kcal/mol] | | | | | | | | | | |
| 1 | -10.86 | -10.36 | -9.72 | -9.53 | -10.86 | -10.45 | -10.38 | -10.59 | -10.55 | -10.14 | -10.16 |
| 2 | -9.67 | -9.59 | -9.20 | -9.29 | -10.28 | -9.14 | -8.68 | -9.47 | -8.54 | -10.09 | -9.77 |
| 3 | -8.26 | -8.02 | -8.42 | -7.86 | -9.66 | -7.22 | -7.93 | -8.27 | -8.21 | -9.84 | -7.83 |
|  | Number of conformations in cluster | | | | | | | | | | |
| 1 | 29 | 37 | 30 | 32 | 45 | 30 | 45 | 58 | 38 | 23 | 32 |
| 2 | 37 | 12 | 30 | 10 | 14 | 17 | 9 | 10 | 10 | 29 | 24 |
| 3 | 7 | 9 | 9 | 7 | 20 | 15 | 2 | 6 | 8 | 12 | 1 |
| 7-OH-DPAT |  | Lowest binding energy [kcal/mol] | | | | | | | | | | |
| 1 | -8.85 | -8.33 | -9.32 | -9.10 | -9.34 | -9.77 | -9.44 | -10.09 | -9.46 | -9.93 | -8.79 |
| 2 | -8.66 | -7.83 | -8.68 | -8.84 | -9.05 | -8.80 | -7.89 | -8.46 | -7.88 | -8.14 | -8.42 |
| 3 | -8.50 | -7.55 | -8.57 | -8.35 | -8.21 | -8.30 | -6.98 | -8.26 | -7.63 | -8.12 | -6.77 |
|  | Number of conformations in cluster | | | | | | | | | | |
| 1 | 28 | 36 | 27 | 25 | 14 | 18 | 26 | 24 | 38 | 36 | 2 |
| 2 | 4 | 19 | 2 | 18 | 32 | 6 | 15 | 14 | 9 | 9 | 3 |
| 3 | 1 | 4 | 12 | 15 | 8 | 18 | 10 | 1 | 4 | 4 | 1 |
| Apomorphine |  | Lowest binding energy [kcal/mol] | | | | | | | | | | |
| 1 | -10.92 | -10.35 | -10.11 | -10.99 | -10.30 | -10.61 | -10.39 | -11.41 | -10.73 | -10.41 | -10.06 |
| 2 | -10.37 | -10.31 | -9.26 | -10.52 | -9.12 | -9.14 | -8.73 | -10.27 | -10.69 | -9.53 | -9.01 |
| 3 | -9.14 | -8.32 | -8.78 | -10,15 | -9.02 | -10.48 | -8.69 | -8.89 | -9.07 | -8.96 | -8.91 |
|  | Number of conformations in cluster | | | | | | | | | | |
| 1 | 47 | 31 | 50 | 24 | 65 | 34 | 38 | 45 | 34 | 39 | 49 |
| 2 | 18 | 9 | 17 | 4 | 2 | 8 | 3 | 11 | 19 | 7 | 3 |
| 3 | 14 | 2 | 3 | 7 | 12 | 20 | 24 | 17 | 9 | 40 | 37 |
| Bromocriptine |  | Lowest binding energy [kcal/mol] | | | | | | | | | | |
| 1 | -5.09 | -9.65 | -7.33 | -9.33 | -7.25 | -2.14 | -8.74 | -9.59 | -9.15 | -12.23 | -5.89 |
| 2 | -4.79 | -7.87 | -7.05 | -1.84 | +0.25 | +2.71 | -7.79 | -4.62 | -5.91 | -10.85 | -0.24 |
| 3 | -3.19 | -7.20 | -5.01 | +2.31 | +4.64 | +5.97 | -6.76 | -3.99 | +2.43 | -10.62 | +5.64 |
|  | Number of conformations in cluster | | | | | | | | | | |
| 1 | 22 | 16 | 33 | 11 | 9 | 3 | 2 | 15 | 17 | 17 | 24 |
| 2 | 7 | 1 | 25 | 1 | 1 | 23 | 5 | 4 | 6 | 12 | 8 |
| 3 | 3 | 8 | 6 | 3 | 11 | 6 | 20 | 5 | 10 | 1 | 11 |
| Clozapine |  | Lowest binding energy [kcal/mol] | | | | | | | | | | |
| 1 | -8.11 | -7.80 | -8.78 | -8.88 | -8.52 | -8.33 | -7.68 | -8.73 | -8.02 | -8.53 | -8.24 |
| 2 | -7.79 | -7.68 | -7.93 | -8.45 | -8.06 | -8.07 | -7.53 | -7.94 | -7.46 | -8.19 | -8.09 |
| 3 | -7.58 | -7.57 | -7.70 | -8.31 | -7.95 | -7.49 | -7.36 | -7.88 | -7.11 | -7.47 | -7.53 |
|  | Number of conformations in cluster | | | | | | | | | | |
| 1 | 30 | 2 | 45 | 8 | 53 | 62 | 51 | 58 | 45 | 15 | 25 |
| 2 | 15 | 15 | 4 | 16 | 15 | 3 | 8 | 8 | 11 | 15 | 40 |
| 3 | 13 | 12 | 9 | 32 | 17 | 2 | 1 | 2 | 6 | 17 | 5 |
| Nemonapride |  | Lowest binding energy [kcal/mol] | | | | | | | | | | |
| 1 | -9.84 | -10.45 | -10.98 | -11.11 | -10.78 | -10.68 | -10.86 | -10.97 | -10.09 | -10.58 | -4.42 |
| 2 | -9.70 | -10.41 | -10.39 | -10.71 | -10.74 | -10.48 | -10.58 | -10.06 | -9.79 | -10.06 | -4.08 |
| 3 | -9.66 | -8.93 | -10.28 | -10.43 | -9.87 | -9.92 | -9.61 | -10.03 | -9.70 | -9.52 | -4.07 |
|  | Number of conformations in cluster | | | | | | | | | | |
| 1 | 15 | 5 | 13 | 12 | 11 | 5 | 5 | 17 | 15 | 11 | 1 |
| 2 | 9 | 2 | 6 | 9 | 10 | 5 | 20 | 7 | 14 | 2 | 1 |
| 3 | 2 | 1 | 7 | 4 | 5 | 7 | 6 | 14 | 13 | 8 | 1 |
| Sulpiride |  | Lowest binding energy [kcal/mol] | | | | | | | | | | |
| 1 | -10.25 | -11.82 | -10.13 | -11.08 | -10.68 | -10.42 | -19.97 | -11.73 | -11.40 | -12.53 | -11.56 |
| 2 | -10.10 | -9.31 | -9.74 | -10.99 | -10.03 | -10.33 | -10.53 | -11.62 | -10.39 | -11.56 | -10.62 |
| 3 | -10.08 | -9.10 | -9.48 | -10.51 | -10.01 | -10.32 | -10.47 | -11.47 | -9.56 | -11.46 | -10.11 |
|  | Number of conformations in cluster | | | | | | | | | | |
| 1 | 5 | 3 | 1 | 2 | 2 | 6 | 4 | 5 | 7 | 2 | 6 |
| 2 | 3 | 2 | 2 | 2 | 5 | 3 | 3 | 4 | 6 | 6 | 4 |
| 3 | 2 | 1 | 1 | 2 | 3 | 3 | 3 | 3 | 1 | 5 | 3 |
| SCH23390 |  | Lowest binding energy [kcal/mol] | | | | | | | | | | |
| 1 | -10.05 | -9.95 | -9.75 | -10.53 | -10.62 | -9.97 | -9.32 | -9.02 | -8.11 | -9.88 | -10.16 |
| 2 | -10.00 | -9.44 | -9.70 | -9.13 | -9.25 | -9.68 | -8.31 | -8.94 | -8.08 | -9.67 | -10.00 |
| 3 | -9.31 | -9.12 | -9.53 | -8.96 | -8.89 | -9.53 | -8.04 | -8.55 | -8.01 | -9.16 | -8.79 |
|  | Number of conformations in cluster | | | | | | | | | | |
| 1 | 3 | 32 | 13 | 16 | 9 | 4 | 9 | 2 | 1 | 4 | 3 |
| 2 | 8 | 9 | 6 | 2 | 2 | 5 | 1 | 3 | 4 | 22 | 9 |
| 3 | 2 | 4 | 7 | 10 | 2 | 2 | 3 | 12 | 13 | 5 | 16 |
| SKF38393 |  | Lowest binding energy [kcal/mol] | | | | | | | | | | |
| 1 | -11.18 | -12.56 | -11.58 | -12.16 | -12.88 | -11.10 | -11.81 | -13.61 | -10.12 | -12.19 | –.01 |
| 2 | -9.80 | -10.78 | -10.70 | -11.53 | -11.25 | -10.74 | -9.98 | -11.02 | -9.04 | -10.29 | -10.55 |
| 3 | -9.75 | -10.48 | -10.54 | -11.30 | -10.90 | -9.00 | -9.51 | -9.89 | -9.03 | -10.11 | -9.68 |
|  | Number of conformations in cluster | | | | | | | | | | |
| 1 | 5 | 30 | 9 | 10 | 6 | 27 | 11 | 14 | 2 | 24 | 6 |
| 2 | 18 | 13 | 12 | 14 | 14 | 13 | 5 | 6 | 3 | 3 | 20 |
| 3 | 9 | 3 | 9 | 14 | 26 | 1 | 2 | 6 | 12 | 1 | 2 |
| Eticlopride |  | Lowest binding energy [kcal/mol] | | | | | | | | | | |
| 1 | -8.86 | -10.12 | -10.59 | -10.00 | -9.34 | -9.39 | -8.89 | -9.87 | -10.29 | -9.86 | -8.89 |
| 2 | -8.80 | -8.55 | -9.99 | -9.78 | -9.17 | -9.34 | -8.62 | -8.70 | -9.79 | -9.82 | -8.82 |
| 3 | -8.77 | -8.10 | -9.71 | -9.64 | -8.89 | -9.27 | -8.48 | -8.53 | -9.20 | -8.56 | -8.51 |
|  | Number of conformations in cluster | | | | | | | | | | |
| 1 | 6 | 2 | 5 | 5 | 6 | 3 | 2 | 9 | 4 | 5 | 28 |
| 2 | 2 | 10 | 7 | 4 | 3 | 7 | 9 | 2 | 9 | 5 | 2 |
| 3 | 12 | 3 | 18 | 17 | 10 | 2 | 14 | 4 | 10 | 12 | 6 |
| Risperidone |  | Lowest binding energy [kcal/mol] | | | | | | | | | | |
| 1 | -9.98 | -9.76 | -12.22 | -11.40 | -9.02 | -9.77 | -8.85 | -10.46 | -8.50 | -10.74 | -10.96 |
| 2 | -8.97 | -8.63 | -11.92 | -10.55 | -8.94 | -9.49 | -8.84 | -9.72 | -8.15 | -10.71 | -10.70 |
| 3 | -8.91 | -8.34 | -10.94 | -10.29 | -8.79 | -8.52 | -8.80 | -8.59 | -7.54 | -10.39 | -10.50 |
|  | Number of conformations in cluster | | | | | | | | | | |
| 1 | 2 | 5 | 7 | 2 | 4 | 3 | 4 | 5 | 2 | 5 | 17 |
| 2 | 9 | 6 | 11 | 13 | 14 | 1 | 8 | 1 | 30 | 3 | 8 |
| 3 | 2 | 2 | 10 | 17 | 1 | 13 | 3 | 9 | 15 | 6 | 10 |
| Aripiprazole |  | Lowest binding energy [kcal/mol] | | | | | | | | | | |
| 1 | -10.87 | -10.91 | -10.59 | -11.52 | -12.00 | -10.81 | -11.04 | -10.15 | -10.95 | -11.08 | -10.55 |
| 2 | -10.78 | -9.84 | -9.74 | -10.08 | -9.97 | -9.14 | -10.08 | -10.07 | -9.73 | -9.84 | -10.39 |
| 3 | -10.20 | -9.64 | -9.67 | -9.71 | -9.68 | -8.93 | -9.97 | -9.45 | -9.44 | -9.64 | -9.90 |
|  | Number of conformations in cluster | | | | | | | | | | |
| 1 | 9 | 2 | 2 | 7 | 2 | 3 | 4 | 3 | 10 | 5 | 1 |
| 2 | 2 | 2 | 6 | 11 | 3 | 2 | 1 | 3 | 3 | 6 | 3 |
| 3 | 10 | 3 | 1 | 5 | 2 | 5 | 8 | 3 | 3 | 6 | 7 |
| Haloperidole |  | Lowest binding energy [kcal/mol] | | | | | | | | | | |
| 1 | -9.88 | -10.35 | -10.36 | -10.26 | -9.98 | -10.38 | -9.94 | -10.92 | -10.28 | -10.36 | -10.13 |
| 2 | -9.54 | -9.40 | -9.94 | -10.23 | -9.96 | -10.04 | -9.67 | -10.71 | -9.57 | -9.92 | -10.12 |
| 3 | -9.54 | -9.31 | -9.91 | -9.83 | -9.80 | -9.90 | -9.62 | -10.32 | -9.53 | -9.87 | -10.05 |
|  | Number of conformations in cluster | | | | | | | | | | |
| 1 | 8 | 2 | 1 | 9 | 1 | 17 | 2 | 3 | 14 | 3 | 11 |
| 2 | 4 | 4 | 3 | 7 | 5 | 1 | 8 | 9 | 15 | 9 | 16 |
| 3 | 10 | 2 | 2 | 15 | 1 | 5 | 5 | 1 | 3 | 3 | 3 |
| Spiperone |  | Lowest binding energy [kcal/mol] | | | | | | | | | | |
| 1 | -10.57 | -10.14 | -10.45 | -10.17 | -10.29 | -10.45 | -9.39 | -10.60 | -9.53 | -11.51 | -10.54 |
| 2 | -9.80 | -9.87 | -10.20 | -9.55 | -10.21 | -10.12 | -10.53 | -10.38 | -9.42 | -10.73 | -10.51 |
| 3 | -9.38 | -9.25 | -9.88 | -9.53 | -9.94 | -10.11 | -10.47 | -10.14 | -9.42 | -10.58 | -10.20 |
|  | Number of conformations in cluster | | | | | | | | | | |
| 1 | 21 | 1 | 4 | 5 | 2 | 3 | 4 | 1 | 13 | 2 | 1 |
| 2 | 9 | 4 | 2 | 4 | 2 | 20 | 9 | 7 | 2 | 1 | 2 |
| 3 | 5 | 1 | 3 | 4 | 3 | 5 | 9 | 2 | 2 | 9 | 1 |
| Chlorpromazine |  | Lowest binding energy [kcal/mol] | | | | | | | | | | |
| 1 | -8.06 | -7.69 | -8.22 | -8.77 | -7.98 | -8.60 | -7.46 | -8.16 | -7.60 | -8.02 | -8.11 |
| 2 | -7.78 | -7.65 | -7.96 | -8.60 | -7.90 | -8.51 | -7.12 | -8.08 | -7.28 | -7.74 | -7.89 |
| 3 | -7.56 | -7.45 | 7.94 | -7.87 | -7.64 | -7.99 | -7.10 | -7.99 | -7.28 | -7.69 | -7.88 |
|  | Number of conformations in cluster | | | | | | | | | | |
| 1 | 20 | 25 | 7 | 15 | 8 | 12 | 7 | 13 | 6 | 13 | 17 |
| 2 | 22 | 23 | 8 | 17 | 16 | 23 | 13 | 13 | 2 | 10 | 4 |
| 3 | 3 | 10 | 8 | 3 | 14 | 6 | 14 | 4 | 20 | 15 | 14 |

**Table S8 - Docking results for the crystal structure templates of D2R (6CM4), D3R (3PBL) and D4R (5WIU) docked with their co-crystalized ligands**. The lowest binding energy ΔGbind [kcal/mol] of every run was measured using AutoDock4.2. Calculated conformations were clustered and ranked by energy level. A populated cluster indicates, that the position docked into the receptor is more likely to depict the conformational binding position of the ligand. The three best clusters were chosen and analyzed. As proof of concept the outcome was compared to the corresponding DR-models docked to risperidone, eticlopride and nemonapride at time point 0 ns using the ligand-coordinates used for all dockings.

| **Crystal structure template** | | **D2R (6CM4)** | | **D3R (3PBL)** | | **D4R (5WIU)** | |
| --- | --- | --- | --- | --- | --- | --- | --- |
| **Co-crystalized ligand** | | **Risperidone** | | **Eticlopride** | | **Nemonapride** | |
|  |  | Lowest binding energy [kcal/mol] | Number of conformations in cluster | Lowest binding energy [kcal/mol] | Number of conformations in cluster | Lowest binding energy [kcal/mol] | Number of conformations in cluster |
| Structure from PDB file | 1 | -13.31 | 36 | -9.31 | 37 | -10.99 | 5 |
| 2 | -13.01 | 19 | -8.97 | 15 | -10.45 | 1 |
| 3 | -12.98 | 1 | -8.94 | 1 | -10.18 | 32 |
| Corresponding DR models | 1 | -10.94 | 9 | -9.98 | 14 | -10.46 | 10 |
| 2 | -10.66 | 2 | -9.34 | 3 | -9.85 | 3 |
| 3 | -10.63 | 11 | -9.07 | 14 | -9.50 | 15 |

**Table S9 - D1R residues with Ballesteros & Weinstein-numbering** [4] **participating in different interaction types sorted by ligands.** Data was summarized for all time points. Abbreviations: Hydrocontacts – hydrophobic contacts; SB – salt-bridges; 2.5 Å – 2.5 Å-interactions; HB – hydrogen bonds; cat-π – cat-π-interactions, T-stack – T-stacking-interactions; π-π-stack – π-π-stacking-interactions. Duplicate residues per interaction type are colored red, while unique residues per interaction type are colored green.

| Interaction type | Hydrocontacts | SB | 2.5 Å | HB | Cat-π | T-stack | π-π-stack |
| --- | --- | --- | --- | --- | --- | --- | --- |
| Dopamine | 156Asp | 3.32Asp | 157Gly | 74Pro | 6.42Gly | 6.43Val |  |
|  | 160Thr | 74Pro | 160Thr | 6.46Cys |  |  |  |
|  | 169Cys |  | 161Ser | 3.32Asp |  |  |  |
|  | 172Ser |  | 169Cys | 172Ser |  |  |  |
|  | 274Cys |  | 172Leu | 172Leu |  |  |  |
|  | 3.29Val |  | 172Ser | 169Cys |  |  |  |
|  | 3.32Asp |  | 3.32Asp | 157Gly |  |  |  |
|  | 3.33Ile |  | 3.36Ser |  |  |  |  |
|  | 3.36Ser |  | 5.37Thr |  |  |  |  |
|  | 5.37Thr |  | 6.46Cys |  |  |  |  |
|  | 6.30Glu |  | 74Pro |  |  |  |  |
|  | 6.31Thr |  |  |  |  |  |  |
|  | 6.34Leu |  |  |  |  |  |  |
|  | 6.39Val |  |  |  |  |  |  |
|  | 6.42Gly |  |  |  |  |  |  |
|  | 6.43Val |  |  |  |  |  |  |
|  | 6.46Cys |  |  |  |  |  |  |
|  | 71Gly |  |  |  |  |  |  |
|  | 74Pro |  |  |  |  |  |  |
|  | 75Phe |  |  |  |  |  |  |
| 7-OH-DPAT | 164Glu | 3.32Asp | 160Thr | 156Asp | 6.42Gly | 6.43Val |  |
|  | 169Cys |  | 169Cys | 169Cys | 6.31Thr |  |  |
|  | 172Ser |  | 172Leu | 172Leu | 6.30Glu |  |  |
|  | 173Leu |  | 172Ser | 172Ser | 231Phe |  |  |
|  | 2.53Val |  | 3.37Thr | 3.37Thr |  |  |  |
|  | 2.57Val |  | 5.37Thr | 6.34Leu |  |  |  |
|  | 231Phe |  | 6.34Leu | 6.46Cys |  |  |  |
|  | 264Phe |  | 6.46Cys |  |  |  |  |
|  | 265Cys |  |  |  |  |  |  |
|  | 266Gly |  |  |  |  |  |  |
|  | 271Gln |  |  |  |  |  |  |
|  | 274Cys |  |  |  |  |  |  |
|  | 275Ile |  |  |  |  |  |  |
|  | 3.23Phe |  |  |  |  |  |  |
|  | 3.28Trp |  |  |  |  |  |  |
|  | 3.29Val |  |  |  |  |  |  |
|  | 3.32Asp |  |  |  |  |  |  |
|  | 3.33Ile |  |  |  |  |  |  |
|  | 3.36Ser |  |  |  |  |  |  |
|  | 5.37THR |  |  |  |  |  |  |
|  | 6.30Glu |  |  |  |  |  |  |
|  | 6.31Thr |  |  |  |  |  |  |
|  | 6.34Leu |  |  |  |  |  |  |
|  | 6.39Val |  |  |  |  |  |  |
|  | 6.42Gly |  |  |  |  |  |  |
|  | 6.43Val |  |  |  |  |  |  |
|  | 6.46Cys |  |  |  |  |  |  |
|  | 7.33Asn |  |  |  |  |  |  |
|  | 71Gly |  |  |  |  |  |  |
|  | 74Pro |  |  |  |  |  |  |
|  | 75Phe |  |  |  |  |  |  |
| Apomorphine | 156Asp |  | 160Thr | 169Cys |  | 6.42Gly | 274Cys |
|  | 169Cys |  | 169Cys | 172Leu |  | 6.43Val |  |
|  | 172Ser |  | 172Ser | 6.34Leu |  | 6.58Leu |  |
|  | 173Leu |  | 173Leu |  |  | 274Cys |  |
|  | 2.57Val |  | 6.34Leu |  |  |  |  |
|  | 274Cys |  | 6.46Cys |  |  |  |  |
|  | 275Ile |  |  |  |  |  |  |
|  | 3.24Phe |  |  |  |  |  |  |
|  | 3.28Trp |  |  |  |  |  |  |
|  | 3.29Val |  |  |  |  |  |  |
|  | 3.32Asp |  |  |  |  |  |  |
|  | 3.33Ile |  |  |  |  |  |  |
|  | 3.36Ser |  |  |  |  |  |  |
|  | 5.37THR |  |  |  |  |  |  |
|  | 6.34Leu |  |  |  |  |  |  |
|  | 6.39Val |  |  |  |  |  |  |
|  | 6.42Gly |  |  |  |  |  |  |
|  | 6.43Val |  |  |  |  |  |  |
|  | 6.46Cys |  |  |  |  |  |  |
|  | 6.48Trp |  |  |  |  |  |  |
|  | 6.58Leu |  |  |  |  |  |  |
|  | 6.59Pro |  |  |  |  |  |  |
|  | 7.33Asn |  |  |  |  |  |  |
|  | 7.34Thr |  |  |  |  |  |  |
|  | 71Gly |  |  |  |  |  |  |
|  | 74Pro |  |  |  |  |  |  |
|  | 75Phe |  |  |  |  |  |  |
| Bromocriptine | 1.31Val |  | 1.31Val | 157Gly |  | 274Cys | 6.39Val |
|  | 1.45Ser |  | 1.59Arg | 169Cys |  | 6.42Gly |  |
|  | 1.55Ala |  | 132Leu | 172Ser |  | 6.43Val |  |
|  | 1.59Arg |  | 157Gly | 2.50Asp |  | 6.58Leu |  |
|  | 132Leu |  | 169Cys | 3.28Trp |  | 7.34Thr |  |
|  | 157Gly |  | 172Ser | 3.32Asp |  |  |  |
|  | 160thr |  | 2.37val | 3.36Ser |  |  |  |
|  | 161ser |  | 2.50asp | 3.42Phe |  |  |  |
|  | 168Asn |  | 2.53val | 6.39Val |  |  |  |
|  | 169Cys |  | 231Phe | 6.46Cys |  |  |  |
|  | 172Ser |  | 266Gly | 7.33Asn |  |  |  |
|  | 1Arg |  | 269Glu | 7.36Asp |  |  |  |
|  | 2.37val |  | 270Thr |  |  |  |  |
|  | 2.41phe |  | 274Cys |  |  |  |  |
|  | 2.45ser |  | 274Ile |  |  |  |  |
|  | 2.50asp |  | 3.24phe |  |  |  |  |
|  | 2.53val |  | 3.28Trp |  |  |  |  |
|  | 2.57val |  | 3.32asp |  |  |  |  |
|  | 2.58met |  | 3.33Ile |  |  |  |  |
|  | 231Phe |  | 3.37Thr |  |  |  |  |
|  | 264Phe |  | 3.39Ser |  |  |  |  |
|  | 266Gly |  | 3.40Ile |  |  |  |  |
|  | 267Ser |  | 336Ser |  |  |  |  |
|  | 269Glu |  | 36His |  |  |  |  |
|  | 270Thr |  | 37leu |  |  |  |  |
|  | 274Cys |  | 5.37Thr |  |  |  |  |
|  | 274Ile |  | 6.29Arg |  |  |  |  |
|  | 3.24phe |  | 6.31Thr |  |  |  |  |
|  | 3.29val |  | 6.39Val |  |  |  |  |
|  | 3.32asp |  | 6.42Gly |  |  |  |  |
|  | 3.33Ile |  | 6.43Val |  |  |  |  |
|  | 3.35Cys |  | 6.46Cys |  |  |  |  |
|  | 3.37Thr |  | 6.59Pro |  |  |  |  |
|  | 3.39Ser |  | 7.33Asn |  |  |  |  |
|  | 3.40Ile |  | 7.36Asp |  |  |  |  |
|  | 336Ser |  | 7.37Val |  |  |  |  |
|  | 34Phe |  | 75phe |  |  |  |  |
|  | 36His |  |  |  |  |  |  |
|  | 37leu |  |  |  |  |  |  |
|  | 5.37Ser |  |  |  |  |  |  |
|  | 5.38Tyr |  |  |  |  |  |  |
|  | 6.29Arg |  |  |  |  |  |  |
|  | 6.30Glu |  |  |  |  |  |  |
|  | 6.31Thr |  |  |  |  |  |  |
|  | 6.34Leu |  |  |  |  |  |  |
|  | 6.35Lys |  |  |  |  |  |  |
|  | 6.38Ser |  |  |  |  |  |  |
|  | 6.39Val |  |  |  |  |  |  |
|  | 6.42Gly |  |  |  |  |  |  |
|  | 6.43Val |  |  |  |  |  |  |
|  | 6.46Cys |  |  |  |  |  |  |
|  | 6.58Leu |  |  |  |  |  |  |
|  | 6.59Pro |  |  |  |  |  |  |
|  | 7.33Asn |  |  |  |  |  |  |
|  | 7.34Thr |  |  |  |  |  |  |
|  | 7.36Asp |  |  |  |  |  |  |
|  | 7.37Val |  |  |  |  |  |  |
|  | 74pro |  |  |  |  |  |  |
|  | 75phe |  |  |  |  |  |  |
| Clozapine | 172Ser |  | 3.28Trp | 3.28Trp |  | 274Cys | 6.39Val |
|  | 2.41Phe |  | 3.32Asp | 3.32Asp |  | 6.39Val | 274Cys |
|  | 2.53Val |  | 3.36Ser | 3.36Ser |  | 6.42Gly |  |
|  | 2.57Val |  | 3.42Phe | 3.42Phe |  | 6.43Val |  |
|  | 231Phe |  | 6.39Val | 6.39Val |  | 7.34Thr |  |
|  | 266Gly |  | 6.46Cys |  |  |  |  |
|  | 267Ser |  |  |  |  |  |  |
|  | 269Glu |  |  |  |  |  |  |
|  | 271Gln |  |  |  |  |  |  |
|  | 274Cys |  |  |  |  |  |  |
|  | 274Ile |  |  |  |  |  |  |
|  | 3.23Ser |  |  |  |  |  |  |
|  | 3.27Ile |  |  |  |  |  |  |
|  | 3.28Trp |  |  |  |  |  |  |
|  | 3.29Val |  |  |  |  |  |  |
|  | 3.32Asp |  |  |  |  |  |  |
|  | 3.33Ile |  |  |  |  |  |  |
|  | 3.35Cys |  |  |  |  |  |  |
|  | 3.36Ser |  |  |  |  |  |  |
|  | 3.42Phe |  |  |  |  |  |  |
|  | 5.37Thr |  |  |  |  |  |  |
|  | 6.30Glu |  |  |  |  |  |  |
|  | 6.34Leu |  |  |  |  |  |  |
|  | 6.39Val |  |  |  |  |  |  |
|  | 6.42Gly |  |  |  |  |  |  |
|  | 6.43Val |  |  |  |  |  |  |
|  | 6.46Cys |  |  |  |  |  |  |
|  | 6.59Pro |  |  |  |  |  |  |
|  | 7.33Asn |  |  |  |  |  |  |
|  | 7.34Thr |  |  |  |  |  |  |
|  | 7.36Asp |  |  |  |  |  |  |
|  | 7.37Val |  |  |  |  |  |  |
|  | 71Gly |  |  |  |  |  |  |
|  | 74Pro |  |  |  |  |  |  |
|  | 75Phe |  |  |  |  |  |  |
| Nemonapride | 169Cys | 3.32Asp | 172Ser | 172Leu | 6.30Glu | 3.28Trp | 7.34Thr |
|  | 172Leu | 74Pro | 2.45Ser | 172Ser | 6.39Val | 6.42Gly | 227Phe |
|  | 172Ser |  | 2.50Asp | 2.45Ser | 6.42Gly | 6.43Val |  |
|  | 2.41Phe |  | 2.67Ala | 2.61Lys | 7.34Thr | 7.34Thr |  |
|  | 2.45Ser |  | 266Gly | 2.67Ala |  |  |  |
|  | 2.46Leu |  | 3.28Trp | 3.28Trp |  |  |  |
|  | 2.49Ser |  | 3.32Asp | 3.32Asp |  |  |  |
|  | 2.53Val |  | 3.36Ser | 6.46Cys |  |  |  |
|  | 2.57Val |  | 6.39Val | 7.33Asn |  |  |  |
|  | 2.61Lys |  | 7.33Asn | 74Pro |  |  |  |
|  | 2.67Ala |  | 7.34Thr |  |  |  |  |
|  | 231Phe |  | 74Pro |  |  |  |  |
|  | 264Phe |  |  |  |  |  |  |
|  | 265Cys |  |  |  |  |  |  |
|  | 266Gly |  |  |  |  |  |  |
|  | 267Ser |  |  |  |  |  |  |
|  | 269Glu |  |  |  |  |  |  |
|  | 270Thr |  |  |  |  |  |  |
|  | 271Gln |  |  |  |  |  |  |
|  | 274Cys |  |  |  |  |  |  |
|  | 274Ile |  |  |  |  |  |  |
|  | 3.23Ser |  |  |  |  |  |  |
|  | 3.28Trp |  |  |  |  |  |  |
|  | 3.29Val |  |  |  |  |  |  |
|  | 3.32Asp |  |  |  |  |  |  |
|  | 3.33Ile |  |  |  |  |  |  |
|  | 3.35Cys |  |  |  |  |  |  |
|  | 3.36Ser |  |  |  |  |  |  |
|  | 3.39Ser |  |  |  |  |  |  |
|  | 3.40Ile |  |  |  |  |  |  |
|  | 3.42Phe |  |  |  |  |  |  |
|  | 5.37Thr |  |  |  |  |  |  |
|  | 6.30Glu |  |  |  |  |  |  |
|  | 6.35Lys |  |  |  |  |  |  |
|  | 6.39Val |  |  |  |  |  |  |
|  | 6.42Gly |  |  |  |  |  |  |
|  | 6.43Val |  |  |  |  |  |  |
|  | 6.46Cys |  |  |  |  |  |  |
|  | 6.59Pro |  |  |  |  |  |  |
|  | 7.32Ser |  |  |  |  |  |  |
|  | 7.33Asn |  |  |  |  |  |  |
|  | 7.34Thr |  |  |  |  |  |  |
|  | 7.36Asp |  |  |  |  |  |  |
|  | 74Pro |  |  |  |  |  |  |
| Sulpiride | 1.36Ala | 3.32Asp | 156Asp | 156Asp | 6.42Gly | 3.28Trp |  |
|  | 1.43Ile | 74Pro | 160Thr | 169Cys | 274Cys | 6.39Val |  |
|  | 1.46Thr |  | 169Cys | 172Leu |  | 6.42Gly |  |
|  | 1.47Leu |  | 172Leu | 3.32Asp |  | 7.34Thr |  |
|  | 1.51Thr |  | 172Ser | 3.36Ser |  |  |  |
|  | 2.41Phe |  | 3.28Trp | 6.34Leu |  |  |  |
|  | 2.45Ser |  | 3.32Asp | 6.46Cys |  |  |  |
|  | 2.53Val |  | 3.36Ser |  |  |  |  |
|  | 2.57Val |  | 3.42Phe |  |  |  |  |
|  | 231Phe |  | 5.37Thr |  |  |  |  |
|  | 264Phe |  | 6.29Arg |  |  |  |  |
|  | 266Gly |  | 6.34Leu |  |  |  |  |
|  | 267Ser |  | 6.39Val |  |  |  |  |
|  | 274Cys |  | 6.46Cys |  |  |  |  |
|  | 274Ile |  | 7.33Asn |  |  |  |  |
|  | 3.23Ser |  |  |  |  |  |  |
|  | 3.28Trp |  |  |  |  |  |  |
|  | 3.29Val |  |  |  |  |  |  |
|  | 3.32Asp |  |  |  |  |  |  |
|  | 3.33Ile |  |  |  |  |  |  |
|  | 3.35Cys |  |  |  |  |  |  |
|  | 3.36Ser |  |  |  |  |  |  |
|  | 6.29Arg |  |  |  |  |  |  |
|  | 6.30Glu |  |  |  |  |  |  |
|  | 6.34Leu |  |  |  |  |  |  |
|  | 6.39Val |  |  |  |  |  |  |
|  | 6.42Gly |  |  |  |  |  |  |
|  | 6.43Val |  |  |  |  |  |  |
|  | 6.46Cys |  |  |  |  |  |  |
|  | 6.58Leu |  |  |  |  |  |  |
|  | 6.59Pro |  |  |  |  |  |  |
|  | 7.33Asn |  |  |  |  |  |  |
|  | 7.34Thr |  |  |  |  |  |  |
|  | 71Gly |  |  |  |  |  |  |
|  | 74Pro |  |  |  |  |  |  |
|  | 75Phe |  |  |  |  |  |  |
| SCH23390 | 169Cys | 3.32Asp | 169Cys | 172Ser | 6.30Glu | 6.39Val | 6.39Val |
|  | 172Leu |  | 172Leu | 3.32Asp | 6.39Val | 6.42Gly | 6.42Gly |
|  | 2.41Phe |  | 172Ser | 6.39Val | 6.42Gly |  | 6.43Val |
|  | 2.45Ser |  | 266Gly | 6.46Cys |  |  |  |
|  | 2.53Val |  | 3.32Asp | 74Pro |  |  |  |
|  | 231Phe |  | 3.36Ser |  |  |  |  |
|  | 264Phe |  | 5.37Thr |  |  |  |  |
|  | 265Cys |  | 6.39Val |  |  |  |  |
|  | 266Gly |  | 6.46Cys |  |  |  |  |
|  | 274Cys |  | 74Pro |  |  |  |  |
|  | 274Ile |  |  |  |  |  |  |
|  | 3.23Ser |  |  |  |  |  |  |
|  | 3.29Val |  |  |  |  |  |  |
|  | 3.32Asp |  |  |  |  |  |  |
|  | 3.33Ile |  |  |  |  |  |  |
|  | 3.35Cys |  |  |  |  |  |  |
|  | 3.36Ser |  |  |  |  |  |  |
|  | 3.40Ile |  |  |  |  |  |  |
|  | 3.42Phe |  |  |  |  |  |  |
|  | 6.30Glu |  |  |  |  |  |  |
|  | 6.39Val |  |  |  |  |  |  |
|  | 6.42Gly |  |  |  |  |  |  |
|  | 6.43Val |  |  |  |  |  |  |
|  | 6.46Cys |  |  |  |  |  |  |
|  | 6.58Leu |  |  |  |  |  |  |
|  | 6.59Pro |  |  |  |  |  |  |
|  | 7.32Ser |  |  |  |  |  |  |
|  | 7.33Asn |  |  |  |  |  |  |
|  | 7.34Thr |  |  |  |  |  |  |
|  | 74Pro |  |  |  |  |  |  |
| SKF38393 | 160Thr | 3.32Asp | 157Gly | 161Ser |  | 6.43Val | 274Cys |
|  | 172Leu | 74Pro | 160Thr | 169Cys |  |  | 6.30Glu |
|  | 172Ser |  | 161Ser | 172Leu |  |  | 6.39Val |
|  | 231Phe |  | 169Cys | 172Ser |  |  | 6.42Gly |
|  | 274Cys |  | 172Leu | 3.32Asp |  |  | 6.43Val |
|  | 3.29Val |  | 172Ser | 6.34Leu |  |  |  |
|  | 3.32Asp |  | 3.32Asp | 6.46Cys |  |  |  |
|  | 3.33Ile |  | 5.37Thr |  |  |  |  |
|  | 3.36Ser |  | 6.34Leu |  |  |  |  |
|  | 3.42Phe |  | 6.39Val |  |  |  |  |
|  | 6.30Glu |  | 6.46Cys |  |  |  |  |
|  | 6.31Thr |  | 71Gly |  |  |  |  |
|  | 6.34Leu |  |  |  |  |  |  |
|  | 6.39Val |  |  |  |  |  |  |
|  | 6.42Gly |  |  |  |  |  |  |
|  | 6.43Val |  |  |  |  |  |  |
|  | 6.46Cys |  |  |  |  |  |  |
|  | 6.58Leu |  |  |  |  |  |  |
|  | 7.33Asn |  |  |  |  |  |  |
|  | 71Gly |  |  |  |  |  |  |
|  | 74Pro |  |  |  |  |  |  |
|  | 75Phe |  |  |  |  |  |  |
| Eticlopride | 169Cys | 3.32Asp | 267Ser | 3.32Asp | 6.42Gly | 274Cys | 6.39Val |
|  | 172Leu | 74Pro | 3.28Trp | 3.36Ser |  | 6.42Gly | 6.42Gly |
|  | 172Ser |  | 3.32Asp | 6.39Val |  |  |  |
|  | 2.41Phe |  | 3.36Ser | 6.46Cys |  |  |  |
|  | 2.45Ser |  | 6.39Val | 7.33Asn |  |  |  |
|  | 2.46Leu |  | 6.46Cys | 74Pro |  |  |  |
|  | 2.53Val |  | 7.33Asn |  |  |  |  |
|  | 2.57Val |  | 74Pro |  |  |  |  |
|  | 2.67Ala |  |  |  |  |  |  |
|  | 231Phe |  |  |  |  |  |  |
|  | 264Phe |  |  |  |  |  |  |
|  | 266Gly |  |  |  |  |  |  |
|  | 267Ser |  |  |  |  |  |  |
|  | 271Gln |  |  |  |  |  |  |
|  | 274Cys |  |  |  |  |  |  |
|  | 274Ile |  |  |  |  |  |  |
|  | 3.28Trp |  |  |  |  |  |  |
|  | 3.29Val |  |  |  |  |  |  |
|  | 3.32Asp |  |  |  |  |  |  |
|  | 3.33Ile |  |  |  |  |  |  |
|  | 3.35Cys |  |  |  |  |  |  |
|  | 3.36Ser |  |  |  |  |  |  |
|  | 3.42Phe |  |  |  |  |  |  |
|  | 5.37Thr |  |  |  |  |  |  |
|  | 6.30Glu |  |  |  |  |  |  |
|  | 6.39Val |  |  |  |  |  |  |
|  | 6.42Gly |  |  |  |  |  |  |
|  | 6.43Val |  |  |  |  |  |  |
|  | 6.46Cys |  |  |  |  |  |  |
|  | 6.48Trp |  |  |  |  |  |  |
|  | 6.59Pro |  |  |  |  |  |  |
|  | 7.32Ser |  |  |  |  |  |  |
|  | 7.33Asn |  |  |  |  |  |  |
|  | 7.34Thr |  |  |  |  |  |  |
|  | 74Pro |  |  |  |  |  |  |
| Risperidone | 160Thr |  | 266Gly | 266Gly |  | 6.58Leu | 264Phe |
|  | 168Asn |  | 274Cys | 3.28Trp |  | 6.43Val | 6.30Glu |
|  | 169Cys |  | 3.28Trp | 3.32Asp |  | 6.42Gly |  |
|  | 172Leu |  | 3.32Asp | 6.46Cys |  | 274Cys |  |
|  | 172Ser |  | 5.37Thr | 7.36Asp |  | 231Phe |  |
|  | 2.45Ser |  | 6.34Leu |  |  |  |  |
|  | 2.49Ser |  | 6.39Val |  |  |  |  |
|  | 2.50Asp |  | 6.46Cys |  |  |  |  |
|  | 2.53Val |  | 6.58Leu |  |  |  |  |
|  | 2.57Val |  | 7.36Asp |  |  |  |  |
|  | 2.58Met |  |  |  |  |  |  |
|  | 231Phe |  |  |  |  |  |  |
|  | 264Phe |  |  |  |  |  |  |
|  | 265Cys |  |  |  |  |  |  |
|  | 266Gly |  |  |  |  |  |  |
|  | 267Ser |  |  |  |  |  |  |
|  | 274Cys |  |  |  |  |  |  |
|  | 274Ile |  |  |  |  |  |  |
|  | 3.28Trp |  |  |  |  |  |  |
|  | 3.29Val |  |  |  |  |  |  |
|  | 3.32Asp |  |  |  |  |  |  |
|  | 3.33Ile |  |  |  |  |  |  |
|  | 3.35Cys |  |  |  |  |  |  |
|  | 3.36Ser |  |  |  |  |  |  |
|  | 3.39Ser |  |  |  |  |  |  |
|  | 3.40Ile |  |  |  |  |  |  |
|  | 3.42Phe |  |  |  |  |  |  |
|  | 5.37Thr |  |  |  |  |  |  |
|  | 6.30Glu |  |  |  |  |  |  |
|  | 6.31Thr |  |  |  |  |  |  |
|  | 6.34Leu |  |  |  |  |  |  |
|  | 6.35Lys |  |  |  |  |  |  |
|  | 6.39Val |  |  |  |  |  |  |
|  | 6.42Gly |  |  |  |  |  |  |
|  | 6.43Val |  |  |  |  |  |  |
|  | 6.46Cys |  |  |  |  |  |  |
|  | 6.58Leu |  |  |  |  |  |  |
|  | 6.59Pro |  |  |  |  |  |  |
|  | 7.32Ser |  |  |  |  |  |  |
|  | 7.33Asn |  |  |  |  |  |  |
|  | 7.34Thr |  |  |  |  |  |  |
|  | 7.36Asp |  |  |  |  |  |  |
|  | 74Pro |  |  |  |  |  |  |
|  | 75Phe |  |  |  |  |  |  |
| Aripiprazole | 157Gly |  | 157Gly | 157Gly |  | 274Cys | 7.34Thr |
|  | 168Asn |  | 160Thr | 169Cys |  | 6.42GLY |  |
|  | 169Cys |  | 161Ser | 172Leu |  | 6.43VAL |  |
|  | 172Ser |  | 169Cys | 3.39Ser |  | 6.58Leu |  |
|  | 2.53Val |  | 172Leu | 6.46Cys |  | 7.34Thr |  |
|  | 2.57Val |  | 172Ser | 7.36Asp |  |  |  |
|  | 264PHE |  | 2.50Asp |  |  |  |  |
|  | 266Gly |  | 3.28Trp |  |  |  |  |
|  | 274Cys |  | 3.36Ser |  |  |  |  |
|  | 275Ile |  | 3.39Ser |  |  |  |  |
|  | 3.24Phe |  | 5.37Thr |  |  |  |  |
|  | 3.28Trp |  | 6.34Leu |  |  |  |  |
|  | 3.29Val |  | 6.46Cys |  |  |  |  |
|  | 3.32Asp |  | 7.33Asn |  |  |  |  |
|  | 3.33Ile |  | 7.34Thr |  |  |  |  |
|  | 3.35Cys |  | 7.36Asp |  |  |  |  |
|  | 3.36Ser |  |  |  |  |  |  |
|  | 3.39Ser |  |  |  |  |  |  |
|  | 3.40Ile |  |  |  |  |  |  |
|  | 5.37THR |  |  |  |  |  |  |
|  | 6.30Glu |  |  |  |  |  |  |
|  | 6.34Leu |  |  |  |  |  |  |
|  | 6.39Val |  |  |  |  |  |  |
|  | 6.42Gly |  |  |  |  |  |  |
|  | 6.43Val |  |  |  |  |  |  |
|  | 6.46Cys |  |  |  |  |  |  |
|  | 6.58LEU |  |  |  |  |  |  |
|  | 6.59PRO |  |  |  |  |  |  |
|  | 7.33Asn |  |  |  |  |  |  |
|  | 7.34Thr |  |  |  |  |  |  |
|  | 7.36Asp |  |  |  |  |  |  |
|  | 71Gly |  |  |  |  |  |  |
|  | 74Pro |  |  |  |  |  |  |
|  | 75Phe |  |  |  |  |  |  |
| Haloperidole | 172Leu | 3.32Asp | 3.28Trp | 3.28Trp | 274Cys | 6.42Gly | 231Phe |
|  | 172Ser | 74Pro | 3.32Asp | 3.32Asp | 6.42Gly | 6.43Val | 6.31Thr |
|  | 2.45Ser |  | 6.39Val | 7.33Asn |  |  | 6.43Val |
|  | 2.53Val |  | 6.46Cys | 74Pro |  |  |  |
|  | 2.57Val |  | 7.33Asn |  |  |  |  |
|  | 2.61Lys |  | 74Pro |  |  |  |  |
|  | 231Phe |  |  |  |  |  |  |
|  | 264Phe |  |  |  |  |  |  |
|  | 265Cys |  |  |  |  |  |  |
|  | 266Gly |  |  |  |  |  |  |
|  | 267Ser |  |  |  |  |  |  |
|  | 271Gln |  |  |  |  |  |  |
|  | 274Cys |  |  |  |  |  |  |
|  | 274Ile |  |  |  |  |  |  |
|  | 3.28Trp |  |  |  |  |  |  |
|  | 3.29Val |  |  |  |  |  |  |
|  | 3.32Asp |  |  |  |  |  |  |
|  | 3.33Ile |  |  |  |  |  |  |
|  | 3.35Cys |  |  |  |  |  |  |
|  | 3.36Ser |  |  |  |  |  |  |
|  | 3.42Phe |  |  |  |  |  |  |
|  | 5.37Thr |  |  |  |  |  |  |
|  | 6.30Glu |  |  |  |  |  |  |
|  | 6.39Val |  |  |  |  |  |  |
|  | 6.42Gly |  |  |  |  |  |  |
|  | 6.43Val |  |  |  |  |  |  |
|  | 6.46Cys |  |  |  |  |  |  |
|  | 6.58Leu |  |  |  |  |  |  |
|  | 6.59Pro |  |  |  |  |  |  |
|  | 7.33Asn |  |  |  |  |  |  |
|  | 7.34Thr |  |  |  |  |  |  |
|  | 7.36Asp |  |  |  |  |  |  |
|  | 71Gly |  |  |  |  |  |  |
|  | 74Pro |  |  |  |  |  |  |
| Spiperone | 168Asn | 3.32Asp | 172Leu | 2.61Lys |  | 274Cys | 3.28Trp |
|  | 169Cys | 74Pro | 172Ser | 3.28Trp |  | 6.42Gly | 6.39Val |
|  | 172Ser |  | 2.61Lys | 6.46Cys |  | 6.43Val | 6.42Gly |
|  | 2.45Ser |  | 2.67Ala |  |  |  | 7.34Thr |
|  | 2.53Val |  | 274Cys |  |  |  |  |
|  | 2.57Val |  | 274Ile |  |  |  |  |
|  | 2.61Lys |  | 3.28Trp |  |  |  |  |
|  | 2.67Ala |  | 3.37Thr |  |  |  |  |
|  | 231Phe |  | 5.37Thr |  |  |  |  |
|  | 264Phe |  | 6.34Leu |  |  |  |  |
|  | 266Gly |  | 6.39Val |  |  |  |  |
|  | 267Ser |  | 6.46Cys |  |  |  |  |
|  | 271Gln |  | 7.33Asn |  |  |  |  |
|  | 274Cys |  | 7.34Thr |  |  |  |  |
|  | 274Ile |  |  |  |  |  |  |
|  | 3.28Trp |  |  |  |  |  |  |
|  | 3.29Val |  |  |  |  |  |  |
|  | 3.32Asp |  |  |  |  |  |  |
|  | 3.33Ile |  |  |  |  |  |  |
|  | 3.35Cys |  |  |  |  |  |  |
|  | 3.36Ser |  |  |  |  |  |  |
|  | 3.40Ile |  |  |  |  |  |  |
|  | 5.37Thr |  |  |  |  |  |  |
|  | 6.30Glu |  |  |  |  |  |  |
|  | 6.31Thr |  |  |  |  |  |  |
|  | 6.34Leu |  |  |  |  |  |  |
|  | 6.35Lys |  |  |  |  |  |  |
|  | 6.39Val |  |  |  |  |  |  |
|  | 6.42Gly |  |  |  |  |  |  |
|  | 6.43Val |  |  |  |  |  |  |
|  | 6.46Cys |  |  |  |  |  |  |
|  | 6.48Trp |  |  |  |  |  |  |
|  | 6.55Asn |  |  |  |  |  |  |
|  | 6.58Leu |  |  |  |  |  |  |
|  | 6.59Pro |  |  |  |  |  |  |
|  | 7.32Ser |  |  |  |  |  |  |
|  | 7.33Asn |  |  |  |  |  |  |
|  | 7.34Thr |  |  |  |  |  |  |
|  | 7.36Asp |  |  |  |  |  |  |
|  | 71Gly |  |  |  |  |  |  |
|  | 74Pro |  |  |  |  |  |  |
|  | 75Phe |  |  |  |  |  |  |
| Chlorpromazine | 2.41Phe |  | 6.39Val | 3.28Trp |  | 274Cys | 264Phe |
|  | 2.45Ser |  | 7.33Asn |  |  | 6.30Glu | 274Cys |
|  | 2.53Val |  |  |  |  | 6.39Val | 3.28Trp |
|  | 2.57Val |  |  |  |  | 6.42Gly | 6.39Val |
|  | 231Phe |  |  |  |  |  | 6.42Gly |
|  | 264Phe |  |  |  |  |  |  |
|  | 266Gly |  |  |  |  |  |  |
|  | 267Ser |  |  |  |  |  |  |
|  | 271Gln |  |  |  |  |  |  |
|  | 274Cys |  |  |  |  |  |  |
|  | 274Ile |  |  |  |  |  |  |
|  | 3.28Trp |  |  |  |  |  |  |
|  | 3.29Val |  |  |  |  |  |  |
|  | 3.32Asp |  |  |  |  |  |  |
|  | 3.33Ile |  |  |  |  |  |  |
|  | 3.35Cys |  |  |  |  |  |  |
|  | 3.36Ser |  |  |  |  |  |  |
|  | 3.42Phe |  |  |  |  |  |  |
|  | 5.37Thr |  |  |  |  |  |  |
|  | 6.30Glu |  |  |  |  |  |  |
|  | 6.31Thr |  |  |  |  |  |  |
|  | 6.34Leu |  |  |  |  |  |  |
|  | 6.39Val |  |  |  |  |  |  |
|  | 6.42Gly |  |  |  |  |  |  |
|  | 6.43Val |  |  |  |  |  |  |
|  | 6.46Cys |  |  |  |  |  |  |
|  | 6.58Leu |  |  |  |  |  |  |
|  | 6.59Pro |  |  |  |  |  |  |
|  | 7.32Ser |  |  |  |  |  |  |
|  | 7.33Asn |  |  |  |  |  |  |
|  | 7.34Thr |  |  |  |  |  |  |
|  | 74Pro |  |  |  |  |  |  |
|  | 75Phe |  |  |  |  |  |  |

**Table S10 - D2R residues with Ballesteros & Weinstein-numbering** [4] **participating in different interaction types sorted by ligands.** Data was summarized for all time points. Abbreviations: Hydrocontacts – hydrophobic contacts; SB – salt-bridges; 2.5 Å – 2.5 Å-interactions; HB – hydrogen bonds; cat-π – cat-π-interactions, T-stack – T-stacking-interactions; π-π-stack – π-π-stacking-interactions. Duplicate residues per interaction type are colored red, while unique residues per interaction type are colored green.

| Interaction type | Hydrocontacts | SB | 2.5 Å | HB | Cat-π | T-stack | π-π-stack |
| --- | --- | --- | --- | --- | --- | --- | --- |
| Dopamine | 156Ile | 3.32Asp | 3.32Asp | 3.32Asp | 6.55His | 6.51Phe | 6.48Trp |
|  | 3.32Asp |  | 5.39Val | 5.39Val |  |  | 6.55His |
|  | 3.33Val |  | 5.42Ser | 5.42Ser |  |  |  |
|  | 3.36Cys |  | 5.43Ser | 5.43Ser |  |  |  |
|  | 5.38Phe |  | 5.46Ser | 5.46Ser |  |  |  |
|  | 5.39Val |  | 6.48Trp | 7.43Tyr |  |  |  |
|  | 5.42Ser |  | 6.55His |  |  |  |  |
|  | 5.43Ser |  | 7.35Tyr |  |  |  |  |
|  | 5.46Ser |  | 7.43Tyr |  |  |  |  |
|  | 5.47Phe |  |  |  |  |  |  |
|  | 6.48Trp |  |  |  |  |  |  |
|  | 6.51Phe |  |  |  |  |  |  |
|  | 6.52Phe |  |  |  |  |  |  |
|  | 6.55His |  |  |  |  |  |  |
|  | 7.39Thr |  |  |  |  |  |  |
|  | 7.43Tyr |  |  |  |  |  |  |
| 7-OH-DPAT | 156Ile | 3.32Asp | 5.39Val | 5.39Val | 6.48Trp | 6.51Phe | 5.47Phe |
|  | 3.28Phe |  | 5.42Ser | 5.43Ser | 6.55His | 6.55His | 6.48Trp |
|  | 3.29Val |  | 5.43Ser | 6.55His |  |  | 6.52Phe |
|  | 3.32Asp |  | 6.45Ile |  |  |  | 6.55His |
|  | 3.33Val |  | 6.55His |  |  |  |  |
|  | 3.36Cys |  |  |  |  |  |  |
|  | 3.37Thr |  |  |  |  |  |  |
|  | 5.38Phe |  |  |  |  |  |  |
|  | 5.39Val |  |  |  |  |  |  |
|  | 5.42Ser |  |  |  |  |  |  |
|  | 5.43Ser |  |  |  |  |  |  |
|  | 5.45Val |  |  |  |  |  |  |
|  | 5.46Ser |  |  |  |  |  |  |
|  | 5.47Phe |  |  |  |  |  |  |
|  | 5.48Tyr |  |  |  |  |  |  |
|  | 6.44Phe |  |  |  |  |  |  |
|  | 6.45Ile |  |  |  |  |  |  |
|  | 6.48Trp |  |  |  |  |  |  |
|  | 6.51Phe |  |  |  |  |  |  |
|  | 6.52Phe |  |  |  |  |  |  |
|  | 6.55His |  |  |  |  |  |  |
|  | 7.35Tyr |  |  |  |  |  |  |
|  | 7.39Thr |  |  |  |  |  |  |
|  | 7.42Gly |  |  |  |  |  |  |
|  | 7.43Tyr |  |  |  |  |  |  |
|  | 72Trp |  |  |  |  |  |  |
| Apomorphine | 156Ile |  | 3.32Asp | 3.32Asp | 6.55His | 6.48Trp | 5.38Phe |
|  | 3.32Asp |  | 3.36Cys | 5.39Val |  | 6.51Phe | 6.48Trp |
|  | 3.33Val |  | 5.39Val | 5.42Ser |  | 7.35Tyr | 6.51Phe |
|  | 3.36Cys |  | 5.42Ser | 5.46Ser |  |  | 6.55His |
|  | 5.38Phe |  | 5.43Ser | 6.55His |  |  |  |
|  | 5.39Val |  | 5.46Ser |  |  |  |  |
|  | 5.42Ser |  | 6.48Trp |  |  |  |  |
|  | 5.43Ser |  | 6.55His |  |  |  |  |
|  | 5.46Ser |  |  |  |  |  |  |
|  | 5.47Phe |  |  |  |  |  |  |
|  | 6.48Trp |  |  |  |  |  |  |
|  | 6.51Phe |  |  |  |  |  |  |
|  | 6.52Phe |  |  |  |  |  |  |
|  | 6.55His |  |  |  |  |  |  |
|  | 7.39Thr |  |  |  |  |  |  |
|  | 7.42Gly |  |  |  |  |  |  |
|  | 7.43Tyr |  |  |  |  |  |  |
|  | 72Trp |  |  |  |  |  |  |
| Bromocriptine | 156Ile |  | 156Ile | 3.32Asp | 6.55His |  | 6.48Trp |
|  | 2.53Val |  | 2.53Val | 3.36Cys |  |  | 6.51Phe |
|  | 2.57Val |  | 3.29Val | 5.38Phe |  |  | 6.55His |
|  | 3.28Phe |  | 3.32Asp | 5.42Ser |  |  |  |
|  | 3.29Val |  | 3.36Cys | 5.46Ser |  |  |  |
|  | 3.32Asp |  | 3.40Ile | 5.48Tyr |  |  |  |
|  | 3.36Cys |  | 5.38Phe | 6.45Ile |  |  |  |
|  | 3.39Ser |  | 5.39Val | 6.48Trp |  |  |  |
|  | 3.40Ile |  | 5.43Ser | 7.35Tyr |  |  |  |
|  | 5.38Phe |  | 5.46Ser | 7.43Tyr |  |  |  |
|  | 5.39Val |  | 5.47Phe |  |  |  |  |
|  | 5.42Ser |  | 5.48Tyr |  |  |  |  |
|  | 5.43Ser |  | 6.44Phe |  |  |  |  |
|  | 5.46Ser |  | 6.48Trp |  |  |  |  |
|  | 5.47Phe |  | 6.52Phe |  |  |  |  |
|  | 5.48Tyr |  | 6.55His |  |  |  |  |
|  | 6.44Phe |  | 6.58Asn |  |  |  |  |
|  | 6.45Ile |  | 7.35Tyr |  |  |  |  |
|  | 6.48Trp |  | 7.43Tyr |  |  |  |  |
|  | 6.49Leu |  |  |  |  |  |  |
|  | 6.51Phe |  |  |  |  |  |  |
|  | 6.52Phe |  |  |  |  |  |  |
|  | 6.55His |  |  |  |  |  |  |
|  | 6.58Asn |  |  |  |  |  |  |
|  | 7.35Tyr |  |  |  |  |  |  |
|  | 7.39Thr |  |  |  |  |  |  |
|  | 7.43Tyr |  |  |  |  |  |  |
|  | 72Trp |  |  |  |  |  |  |
| Clozapine | 156Ile |  | 3.32Asp | 3.32Asp | 6.55His | 5.38Phe | 3.28Phe |
|  | 2.53Val |  | 3.36Cys | 5.46Ser |  | 6.48Trp | 6.48Trp |
|  | 2.57Val |  | 5.42Ser | 6.55His |  | 6.51Phe | 6.55His |
|  | 3.28Phe |  | 5.46Ser | 6.58Asn |  | 6.55His |  |
|  | 3.29Val |  | 6.55His |  |  | 7.35Tyr |  |
|  | 3.32Asp |  | 6.58Asn |  |  | 7.43Tyr |  |
|  | 3.33Val |  |  |  |  |  |  |
|  | 3.36Cys |  |  |  |  |  |  |
|  | 3.39Ser |  |  |  |  |  |  |
|  | 5.38Phe |  |  |  |  |  |  |
|  | 5.39Val |  |  |  |  |  |  |
|  | 5.42Ser |  |  |  |  |  |  |
|  | 5.43Ser |  |  |  |  |  |  |
|  | 5.45Val |  |  |  |  |  |  |
|  | 5.46Ser |  |  |  |  |  |  |
|  | 5.47Phe |  |  |  |  |  |  |
|  | 6.44Phe |  |  |  |  |  |  |
|  | 6.48Trp |  |  |  |  |  |  |
|  | 6.51Phe |  |  |  |  |  |  |
|  | 6.52Phe |  |  |  |  |  |  |
|  | 6.54Thr |  |  |  |  |  |  |
|  | 6.55His |  |  |  |  |  |  |
|  | 6.58Asn |  |  |  |  |  |  |
|  | 7.35Tyr |  |  |  |  |  |  |
|  | 7.39Thr |  |  |  |  |  |  |
|  | 7.42Gly |  |  |  |  |  |  |
|  | 7.43Tyr |  |  |  |  |  |  |
|  | 7.45Asn |  |  |  |  |  |  |
|  | 72Trp |  |  |  |  |  |  |
| Nemonapride | 1.44Ala | 1.53Val | 1.44Ala | 3.32Asp | 3.28Phe | 3.28Phe | 3.28Phe |
|  | 1.45Val | 3.32Asp | 3.32Asp | 3.36Cys | 6.55His | 6.48Trp | 5.38Phe |
|  | 1.48Phe |  | 5.43Ser | 5.43Ser |  | 6.52Phe |  |
|  | 1.49Gly |  | 5.46Ser | 5.46Ser |  | 72Trp |  |
|  | 1.50Asn |  | 6.48Trp | 6.48Trp |  |  |  |
|  | 1.53Val |  | 6.52Phe | 7.43Tyr |  |  |  |
|  | 1.54Cys |  | 6.55His |  |  |  |  |
|  | 155Ile |  | 7.35Tyr |  |  |  |  |
|  | 156Ile |  | 7.43Tyr |  |  |  |  |
|  | 2.57Val |  |  |  |  |  |  |
|  | 2.61Val |  |  |  |  |  |  |
|  | 2.64Leu |  |  |  |  |  |  |
|  | 3.28Phe |  |  |  |  |  |  |
|  | 3.29Val |  |  |  |  |  |  |
|  | 3.32Asp |  |  |  |  |  |  |
|  | 3.33Val |  |  |  |  |  |  |
|  | 3.36Cys |  |  |  |  |  |  |
| Sulpiride | 3.43Leu |  |  |  |  |  |  |
|  | 3.48Ile |  |  |  |  |  |  |
|  | 3.52Thr |  |  |  |  |  |  |
|  | 3Arg |  |  |  |  |  |  |
|  | 4Pro |  |  |  |  |  |  |
|  | 5.38Phe |  |  |  |  |  |  |
|  | 5.39Val |  |  |  |  |  |  |
|  | 5.42Ser |  |  |  |  |  |  |
|  | 5.43Ser |  |  |  |  |  |  |
|  | 5.46Ser |  |  |  |  |  |  |
|  | 5.47Phe |  |  |  |  |  |  |
|  | 6.48Trp |  |  |  |  |  |  |
|  | 6.51Phe |  |  |  |  |  |  |
|  | 6.52Phe |  |  |  |  |  |  |
|  | 6.55His |  |  |  |  |  |  |
|  | 7.35Tyr |  |  |  |  |  |  |
|  | 7.36Ser |  |  |  |  |  |  |
|  | 7.39Thr |  |  |  |  |  |  |
|  | 7.42Gly |  |  |  |  |  |  |
|  | 7.43Tyr |  |  |  |  |  |  |
|  | 72Trp |  |  |  |  |  |  |
| SCH23390 | 156Ile | 3.32Asp | 3.32Asp | 3.32Asp | 6.55His | 3.28Phe | 6.51Phe |
|  | 2.53Val |  | 5.39Val | 5.39Val | only at timetpoint 70 ns | 5.38Phe | 6.55His |
|  | 2.61Val |  | 5.42Ser | 5.42Ser |  | 6.48Trp |  |
|  | 2.64Leu |  | 5.43Ser | 5.43Ser |  | 6.51Phe |  |
|  | 3.28Phe |  | 5.46Ser | 5.46Ser |  |  |  |
|  | 3.29Val |  | 6.48Trp | 6.48Trp |  |  |  |
|  | 3.32Asp |  | 6.51Phe | 7.35Tyr |  |  |  |
|  | 3.33Val |  | 6.55His | 7.43Tyr |  |  |  |
|  | 3.36Cys |  | 7.35Tyr |  |  |  |  |
|  | 5.38Phe |  | 7.39Thr |  |  |  |  |
|  | 5.39Val |  | 7.40Trp |  |  |  |  |
|  | 5.42Ser |  | 7.43Tyr |  |  |  |  |
|  | 5.46Ser |  |  |  |  |  |  |
|  | 6.48Trp |  |  |  |  |  |  |
|  | 6.51Phe |  |  |  |  |  |  |
|  | 6.52Phe |  |  |  |  |  |  |
|  | 6.55His |  |  |  |  |  |  |
|  | 7.35Tyr |  |  |  |  |  |  |
|  | 7.36Ser |  |  |  |  |  |  |
|  | 7.39Thr |  |  |  |  |  |  |
|  | 7.40Trp |  |  |  |  |  |  |
|  | 7.42Gly |  |  |  |  |  |  |
|  | 7.43Tyr |  |  |  |  |  |  |
|  | 72Trp |  |  |  |  |  |  |
| SKF38393 | 156Ile | 3.32Asp | 5.39Val | 5.39Val | 6.48Trp | 5.38Phe | 5.47Phe |
|  | 3.29Val |  | 5.42Ser | 5.42Ser | 6.51Phe | 6.48Trp | 6.48Trp |
|  | 3.32Asp |  | 5.43Ser | 5.43Ser | 6.55His | 6.51Phe | 6.51Phe |
|  | 3.33Val |  | 5.46Ser | 6.55His |  | 6.55His | 6.55His |
|  | 3.36Cys |  | 6.55His |  |  |  |  |
|  | 3.39Ser |  | 7.35Tyr |  |  |  |  |
|  | 5.38Phe |  | 7.43Tyr |  |  |  |  |
|  | 5.39Val |  |  |  |  |  |  |
|  | 5.42Ser |  |  |  |  |  |  |
|  | 5.43Ser |  |  |  |  |  |  |
|  | 5.46Ser |  |  |  |  |  |  |
|  | 5.47Phe |  |  |  |  |  |  |
|  | 6.44Phe |  |  |  |  |  |  |
|  | 6.48Trp |  |  |  |  |  |  |
|  | 6.51Phe |  |  |  |  |  |  |
|  | 6.52Phe |  |  |  |  |  |  |
|  | 6.55His |  |  |  |  |  |  |
|  | 7.35Tyr |  |  |  |  |  |  |
|  | 7.39Thr |  |  |  |  |  |  |
|  | 7.42Gly |  |  |  |  |  |  |
|  | 7.43Tyr |  |  |  |  |  |  |
| Eticlopride | 156Ile | 3.32Asp | 3.32Asp | 3.32Asp | 6.55His | 6.48Trp | 6.48Trp |
|  | 3.32Asp |  | 5.39Val | 3.33Val |  | 6.51Phe | 6.51Phe |
|  | 3.33Val |  | 5.42Ser | 5.39Val |  |  | 6.52Phe |
|  | 3.36Cys |  | 5.43Ser | 5.42Ser |  |  | 6.55His |
|  | 5.38Phe |  | 5.46Ser | 5.46Ser |  |  |  |
|  | 5.42Ser |  | 6.48Trp | 6.55His |  |  |  |
|  | 5.43Ser |  | 6.55His | 7.43Tyr |  |  |  |
|  | 5.46Ser |  | 7.43Tyr |  |  |  |  |
|  | 6.48Trp |  |  |  |  |  |  |
|  | 6.51Phe |  |  |  |  |  |  |
|  | 6.52Phe |  |  |  |  |  |  |
|  | 6.55His |  |  |  |  |  |  |
|  | 7.35Tyr |  |  |  |  |  |  |
|  | 7.39Thr |  |  |  |  |  |  |
|  | 7.42Gly |  |  |  |  |  |  |
|  | 7.43Tyr |  |  |  |  |  |  |
| Risperidone | 156Ile |  | 3.32Asp | 3.32Asp | 6.55His | 5.38Phe | 6.48Trp |
|  | 2.57Val |  | 3.36Cys | 5.46Ser |  | 6.48Trp | 6.52Phe |
|  | 2.61Val |  | 5.42Ser | 6.48Trp |  | 6.51Phe |  |
|  | 2.64Leu |  | 5.46Ser | 7.35Tyr |  | 6.55His |  |
|  | 3.28Phe |  | 6.48Trp | 7.43Tyr |  | 72Trp |  |
|  | 3.29Val |  | 7.35Tyr |  |  |  |  |
|  | 3.32Asp |  | 7.40Trp |  |  |  |  |
|  | 3.33Val |  | 7.43Tyr |  |  |  |  |
|  | 3.36Cys |  |  |  |  |  |  |
|  | 5.38Phe |  |  |  |  |  |  |
|  | 5.39Val |  |  |  |  |  |  |
|  | 5.42Ser |  |  |  |  |  |  |
|  | 5.43Ser |  |  |  |  |  |  |
|  | 5.46Ser |  |  |  |  |  |  |
|  | 5.47Phe |  |  |  |  |  |  |
|  | 6.44Phe |  |  |  |  |  |  |
|  | 6.48Trp |  |  |  |  |  |  |
|  | 6.51Phe |  |  |  |  |  |  |
|  | 6.52Phe |  |  |  |  |  |  |
|  | 6.55His |  |  |  |  |  |  |
|  | 7.35Tyr |  |  |  |  |  |  |
|  | 7.36Ser |  |  |  |  |  |  |
|  | 7.39Thr |  |  |  |  |  |  |
|  | 7.40Trp |  |  |  |  |  |  |
|  | 7.42Gly |  |  |  |  |  |  |
|  | 7.43Tyr |  |  |  |  |  |  |
|  | 72Trp |  |  |  |  |  |  |
| Aripiprazole | 156Ile |  | 3.32Asp | 5.39Val | 6.55His | 3.28Phe | 6.48Trp |
|  | 2.57Val |  | 5.38Phe | 5.42Ser |  | 5.38Phe | 6.51Phe |
|  | 2.61Val |  | 5.39Val | 5.43Ser |  | 6.48Trp | 6.55His |
|  | 2.64Leu |  | 5.42Ser | 5.46Ser |  | 6.51Phe | 7.43Tyr |
|  | 3.28Phe |  | 5.43Ser | 6.51Phe |  | 6.55His |  |
|  | 3.29Val |  | 5.46Ser | 7.35Tyr |  | 72Trp |  |
|  | 3.32Asp |  | 6.48Trp |  |  |  |  |
|  | 3.33Val |  | 6.51Phe |  |  |  |  |
|  | 3.36Cys |  | 6.55His |  |  |  |  |
|  | 5.38Phe |  | 7.35Tyr |  |  |  |  |
|  | 5.39Val |  | 7.43Tyr |  |  |  |  |
|  | 5.42Ser |  |  |  |  |  |  |
|  | 5.43Ser |  |  |  |  |  |  |
|  | 5.46Ser |  |  |  |  |  |  |
|  | 5.47Phe |  |  |  |  |  |  |
|  | 6.44Phe |  |  |  |  |  |  |
|  | 6.48Trp |  |  |  |  |  |  |
|  | 6.51Phe |  |  |  |  |  |  |
|  | 6.52Phe |  |  |  |  |  |  |
|  | 6.54Thr |  |  |  |  |  |  |
|  | 6.55His |  |  |  |  |  |  |
|  | 7.35Tyr |  |  |  |  |  |  |
|  | 7.36Ser |  |  |  |  |  |  |
|  | 7.39Thr |  |  |  |  |  |  |
|  | 7.40Trp |  |  |  |  |  |  |
|  | 7.42Gly |  |  |  |  |  |  |
|  | 7.43Tyr |  |  |  |  |  |  |
|  | 7.45Asn |  |  |  |  |  |  |
|  | 72Trp |  |  |  |  |  |  |
| Haloperidole | 156Ile | 3.32Asp | 3.32Asp | 3.32Asp | 6.48Trp | 6.52Phe | 3.28Phe |
|  | 2.53Val |  | 3.36Cys | 5.42Ser | 6.55His | 6.55His | 5.47Phe |
|  | 2.57Val |  | 3.40Ile | 5.46Ser |  | 7.43Tyr | 6.48Trp |
|  | 3.28Phe |  | 5.42Ser | 6.48Trp |  |  | 6.52Phe |
|  | 3.29Val |  | 5.46Ser |  |  |  | 6.55His |
|  | 3.32Asp |  | 6.48Trp |  |  |  |  |
|  | 3.33Val |  | 7.43Tyr |  |  |  |  |
|  | 3.36Cys |  |  |  |  |  |  |
|  | 3.39Ser |  |  |  |  |  |  |
|  | 3.40Ile |  |  |  |  |  |  |
|  | 5.38Phe |  |  |  |  |  |  |
|  | 5.39Val |  |  |  |  |  |  |
|  | 5.42Ser |  |  |  |  |  |  |
|  | 5.43Ser |  |  |  |  |  |  |
|  | 5.46Ser |  |  |  |  |  |  |
|  | 5.47Phe |  |  |  |  |  |  |
|  | 6.44Phe |  |  |  |  |  |  |
|  | 6.48Trp |  |  |  |  |  |  |
|  | 6.51Phe |  |  |  |  |  |  |
|  | 6.52Phe |  |  |  |  |  |  |
|  | 6.55His |  |  |  |  |  |  |
|  | 7.35Tyr |  |  |  |  |  |  |
|  | 7.39Thr |  |  |  |  |  |  |
|  | 7.42Gly |  |  |  |  |  |  |
|  | 7.43Tyr |  |  |  |  |  |  |
|  | 72Trp |  |  |  |  |  |  |
| Spiperone | 156Ile | 3.32Asp | 156Ile | 6.48Trp | 6.48Trp | 3.28Phe | 6.48Trp |
|  | 2.53Val |  | 3.32Asp | 6.55His | 6.55His | 6.48Trp | 6.51Phe |
|  | 3.28Phe |  | 3.33Val | 7.35Tyr |  | 6.51Phe | 6.55His |
|  | 3.29Val |  | 3.36Cys | 7.43Tyr |  | 6.55His |  |
|  | 3.32Asp |  | 6.48Trp |  |  | 7.43Tyr |  |
|  | 3.33Val |  | 6.55His |  |  |  |  |
|  | 3.35Met |  | 7.35Tyr |  |  |  |  |
|  | 3.36Cys |  | 7.39Thr |  |  |  |  |
|  | 3.39Ser |  | 7.42Gly |  |  |  |  |
|  | 3.40Ile |  | 7.43Tyr |  |  |  |  |
|  | 5.38Phe |  | 7.46Ser |  |  |  |  |
|  | 5.39Val |  |  |  |  |  |  |
|  | 5.42Ser |  |  |  |  |  |  |
|  | 5.43Ser |  |  |  |  |  |  |
|  | 5.46Ser |  |  |  |  |  |  |
|  | 5.47Phe |  |  |  |  |  |  |
|  | 6.44Phe |  |  |  |  |  |  |
|  | 6.48Trp |  |  |  |  |  |  |
|  | 6.51Phe |  |  |  |  |  |  |
|  | 6.52Phe |  |  |  |  |  |  |
|  | 6.55His |  |  |  |  |  |  |
|  | 7.35Tyr |  |  |  |  |  |  |
|  | 7.38Phe |  |  |  |  |  |  |
|  | 7.39Thr |  |  |  |  |  |  |
|  | 7.42Gly |  |  |  |  |  |  |
|  | 7.43Tyr |  |  |  |  |  |  |
|  | 72Trp |  |  |  |  |  |  |
| Chlorpromazine | 156Ile |  | 6.55His |  | 6.55His | 5.38Phe | 6.48Trp |
|  | 2.53Val |  |  |  |  | 6.48Trp | 6.51Phe |
|  | 2.57Val |  | only at timepoint 85 |  |  | 6.51Phe | 6.55His |
|  | 3.29Val |  |  |  |  |  |  |
|  | 3.32Asp |  |  |  |  |  |  |
|  | 3.33Val |  |  |  |  |  |  |
|  | 3.36Cys |  |  |  |  |  |  |
|  | 5.38Phe |  |  |  |  |  |  |
|  | 5.39Val |  |  |  |  |  |  |
|  | 5.42Ser |  |  |  |  |  |  |
|  | 5.43Ser |  |  |  |  |  |  |
|  | 5.46Ser |  |  |  |  |  |  |
|  | 5.47Phe |  |  |  |  |  |  |
|  | 6.44Phe |  |  |  |  |  |  |
|  | 6.48Trp |  |  |  |  |  |  |
|  | 6.51Phe |  |  |  |  |  |  |
|  | 6.52Phe |  |  |  |  |  |  |
|  | 6.55His |  |  |  |  |  |  |
|  | 7.39Thr |  |  |  |  |  |  |
|  | 7.42Gly |  |  |  |  |  |  |
|  | 7.43Tyr |  |  |  |  |  |  |
|  |  |  |  |  |  |  |  |
|  |  |  |  |  |  |  |  |
|  |  |  |  |  |  |  |  |
|  |  |  |  |  |  |  |  |
|  |  |  |  |  |  |  |  |
|  |  |  |  |  |  |  |  |
|  |  |  |  |  |  |  |  |

**Table S11 - D3R residues with Ballesteros & Weinstein-numbering** [4] **participating in different interaction types sorted by ligands.** Data was summarized for all time points. Abbreviations: Hydrocontacts – hydrophobic contacts; SB – salt-bridges; 2.5 Å – 2.5 Å-interactions; HB – hydrogen bonds; cat-π – cat-π-interactions, T-stack – T-stacking-interactions; π-π-stack – π-π-stacking-interactions. Duplicate residues per interaction type are colored red, while unique residues per interaction type are colored green.

| Interaction type | Hydrocontacts | SB | 2.5 Å | HB | Cat-π | T-stack | π-π-stack |
| --- | --- | --- | --- | --- | --- | --- | --- |
| Dopamine | 159Ile | 3.32Asp | 3.32Asp | 3.32Asp | 2.48Val | 6.51Phe | 2.48Val |
| 2.42Leu | 3.33Val | 5.39Val | 6.55His | 6.52Phe | 35Ala |
| 2.44Val | 5.38Phe | 5.42Ser |  | 6.55His | 38Thr |
| 2.45Ser | 5.39Val | 5.43Ser |  |  | 6.52Phe |
| 2.46Leu | 5.42Ser | 6.51Phe |  |  |  |
| 2.47Ala | 5.43Ser |  |  |  |  |
| 2.48Val | 5.46Ser |  |  |  |  |
| 3.32Asp | 6.52Phe |  |  |  |  |
| 3.33Val | 74Phe |  |  |  |  |
| 3.36Cys |  |  |  |  |  |
| 34Arg |  |  |  |  |  |
| 35Ala |  |  |  |  |  |
| 38Thr |  |  |  |  |  |
| 5.38Phe |  |  |  |  |  |
| 5.39Val |  |  |  |  |  |
| 5.42Ser |  |  |  |  |  |
| 6.48Trp |  |  |  |  |  |
| 6.51Phe |  |  |  |  |  |
| 6.52Phe |  |  |  |  |  |
| 6.55His |  |  |  |  |  |
| 7-OH-DPAT | 1.58Leu | 3.32Asp | 1.58Leu | 5.39Val | 2.14Tyr | 2.46Leu | 2.48Val |
| 159Ile | 3.36Cys | 5.43Ser | 2.42Leu | 2.47Ala | 2.49Ala |
| 2.41Tyr | 5.39Val |  | 2.48Val | 2.50Asp | 35Ala |
| 2.42Leu | 5.42Ser |  | 2.49Ala | 5.38Phe | 6.52Phe |
| 2.43Val | 5.43Ser |  | 34Arg | 6.52Phe | 6.55His |
| 2.44Val | 5.46Ser |  | 6.48Trp | 6.55His |  |
| 2.45Ser |  |  | 6.55His |  |  |
| 2.46Leu |  |  |  |  |  |
| 2.47Ala |  |  |  |  |  |
| 2.48Val |  |  |  |  |  |
| 2.49Ala |  |  |  |  |  |
| 2.50Asp |  |  |  |  |  |
| 3.29Val |  |  |  |  |  |
| 3.32Asp |  |  |  |  |  |
| 3.33Val |  |  |  |  |  |
| 3.36Cys |  |  |  |  |  |
| 34Arg |  |  |  |  |  |
| 35Ala |  |  |  |  |  |
| 38Thr |  |  |  |  |  |
| 5.38Phe |  |  |  |  |  |
| 5.39Val |  |  |  |  |  |
| 5.42Ser |  |  |  |  |  |
| 5.46Ser |  |  |  |  |  |
| 6.48Trp |  |  |  |  |  |
| 6.51Phe |  |  |  |  |  |
| 6.52Phe |  |  |  |  |  |
| 6.55His |  |  |  |  |  |
| 69Gly |  |  |  |  |  |
| 7.39Thr |  |  |  |  |  |
| 7.42Gly |  |  |  |  |  |
| 7.43Tyr |  |  |  |  |  |
| 70Gly |  |  |  |  |  |
| 73Asn |  |  |  |  |  |
| Apomorphine | 159Ile |  | 2.14Tyr | 3.32Asp | 2.48Val | 2.41Tyr | 2.44Val |
| 2.41Tyr | 2.47Ala | 5.39Val | 38Thr | 2.42Leu | 2.48Val |
| 2.42Leu | 3.32Asp | 5.42Ser | 6.55His | 2.43Val | 34Arg |
| 2.44Val | 3.36Cys | 5.43Ser |  | 2.45Ser | 38Thr |
| 2.45Ser | 5.39Val | 5.46Ser |  | 2.46Leu | 6.48Trp |
| 2.46Leu | 5.42Ser |  |  | 38Thr | 6.52Phe |
| 2.47Ala | 5.43Ser |  |  | 6.48Trp | 6.55His |
| 2.48Val | 5.46Ser |  |  | 6.51Phe |  |
| 2.50Asp | 6.52Phe |  |  | 6.52Phe |  |
| 2.57Val | 6.55His |  |  | 6.55His |  |
| 3.29Val |  |  |  |  |  |
| 3.32Asp |  |  |  |  |  |
| 3.33Val |  |  |  |  |  |
| 3.35Met |  |  |  |  |  |
| 3.36Cys |  |  |  |  |  |
| 34Arg |  |  |  |  |  |
| 35Ala |  |  |  |  |  |
| 38Thr |  |  |  |  |  |
| 39Thr |  |  |  |  |  |
| 5.38Phe |  |  |  |  |  |
| 5.39Val |  |  |  |  |  |
| 5.42Ser |  |  |  |  |  |
| 5.46Ser |  |  |  |  |  |
| 6.44Phe |  |  |  |  |  |
| 6.47Cys |  |  |  |  |  |
| 6.48Trp |  |  |  |  |  |
| 6.51Phe |  |  |  |  |  |
| 6.52Phe |  |  |  |  |  |
| 6.55His |  |  |  |  |  |
| 7.35Tyr |  |  |  |  |  |
| 7.38Thr |  |  |  |  |  |
| 7.39Thr |  |  |  |  |  |
| 7.42Gly |  |  |  |  |  |
| 7.43Tyr |  |  |  |  |  |
| 70Gly |  |  |  |  |  |
| 74Phe |  |  |  |  |  |
| Bromocriptine | 1.54Cys |  | 1.58Leu | 159Ile | 38Thr | 2.42Leu | 2.42Leu |
| 1.57Val | 157Cys | 2.48Val | 6.55His | 2.43Val | 2.43Val |
| 1.58Leu | 159Ile | 2.60Trp |  | 2.45Ser | 2.45Ser |
| 157Cys | 2.39Thr | 3.29Val |  | 2.46Leu | 2.46Leu |
| 158Ser | 2.41Tyr | 3.32Asp |  | 34Arg | 34Arg |
| 159Ile | 2.43Val | 3.35Met |  | 38Thr | 38Thr |
| 2.39Thr | 2.44Val | 3.36Cys |  | 6.48Trp | 6.48Trp |
| 2.41Tyr | 2.48Val | 5.39Val |  | 6.51Phe | 6.51Phe |
| 2.42Leu | 2.60Trp | 5.46Ser |  |  |  |
| 2.43Val | 2.61Val | 6.55His |  |  |  |
| 2.44Val | 2.64Leu | 7.35Tyr |  |  |  |
| 2.45Ser | 3.29Val | 7.38Thr |  |  |  |
| 2.46Leu | 3.32Asp |  |  |  |  |
| 2.48Val | 3.33Val |  |  |  |  |
| 2.53Val | 3.36Cys |  |  |  |  |
| 2.57Val | 3.40Ile |  |  |  |  |
| 2.60Trp | 34Arg |  |  |  |  |
| 2.61Val | 38Thr |  |  |  |  |
| 2.64Leu | 39Thr |  |  |  |  |
| 2.65Glu | 5.38Phe |  |  |  |  |
| 2.66Val | 5.39Val |  |  |  |  |
| 3.28Phe | 5.42Ser |  |  |  |  |
| 3.29Val | 5.46Ser |  |  |  |  |
| 3.32Asp | 5.47Phe |  |  |  |  |
| 3.33Val | 6.44Phe |  |  |  |  |
| 3.35Met | 6.48Trp |  |  |  |  |
| 3.36Cys | 6.51Phe |  |  |  |  |
| 3.40Ile | 6.52Phe |  |  |  |  |
| 34Arg | 6.55His |  |  |  |  |
| 35Ala | 69Gly |  |  |  |  |
| 38Thr | 7.35Tyr |  |  |  |  |
| 39Thr | 7.38Thr |  |  |  |  |
| 5.38Phe | 7.39Thr |  |  |  |  |
| 5.39Val | 7.42Gly |  |  |  |  |
| 5.42Ser | 7.43Tyr |  |  |  |  |
| 5.43Ser | 74Phe |  |  |  |  |
| 5.46Ser |  |  |  |  |  |
| 5.47Phe |  |  |  |  |  |
| 6.44Phe |  |  |  |  |  |
| 6.47Cys |  |  |  |  |  |
| 6.48Trp |  |  |  |  |  |
| 6.51Phe |  |  |  |  |  |
| 6.52Phe |  |  |  |  |  |
| 6.55His |  |  |  |  |  |
| 69Gly |  |  |  |  |  |
| 7.35Tyr |  |  |  |  |  |
| 7.38Thr |  |  |  |  |  |
| 7.39Thr |  |  |  |  |  |
| 7.42Gly |  |  |  |  |  |
| 7.43Tyr |  |  |  |  |  |
| 70Gly |  |  |  |  |  |
| 71Val |  |  |  |  |  |
| 73Asn |  |  |  |  |  |
| 74Phe |  |  |  |  |  |
| 75Ser |  |  |  |  |  |
| Clozapine | 1.58Leu |  | 2.46Leu | 3.32Asp | 2.48Val | 2.45Ser | 1.58Leu |
| 157Cys | 3.32Asp | 38Thr | 38Thr | 2.46Leu | 2.43Val |
| 158Ser | 3.36Cys | 6.48Trp | 6.55His | 34Arg | 2.49Ala |
| 159Ile | 35Ala | 6.55His |  | 6.51Phe | 3.28Phe |
| 2.41Tyr | 38Thr |  |  |  | 6.48Trp |
| 2.42Leu | 6.48Trp |  |  |  |  |
| 2.43Val | 6.52Phe |  |  |  |  |
| 2.44Val | 6.55His |  |  |  |  |
| 2.45Ser | 71Val |  |  |  |  |
| 2.46Leu |  |  |  |  |  |
| 2.48Val |  |  |  |  |  |
| 2.49Ala |  |  |  |  |  |
| 2.53Val |  |  |  |  |  |
| 2.57Val |  |  |  |  |  |
| 3.28Phe |  |  |  |  |  |
| 3.29Val |  |  |  |  |  |
| 3.32Asp |  |  |  |  |  |
| 3.33Val |  |  |  |  |  |
| 3.36Cys |  |  |  |  |  |
| 34Arg |  |  |  |  |  |
| 35Ala |  |  |  |  |  |
| 38Thr |  |  |  |  |  |
| 39Thr |  |  |  |  |  |
| 5.38Phe |  |  |  |  |  |
| 5.39Val |  |  |  |  |  |
| 5.42Ser |  |  |  |  |  |
| 5.43Ser |  |  |  |  |  |
| 6.48Trp |  |  |  |  |  |
| 6.51Phe |  |  |  |  |  |
| 6.52Phe |  |  |  |  |  |
| 6.55His |  |  |  |  |  |
| 6.56Val |  |  |  |  |  |
| 7.39Thr |  |  |  |  |  |
| 7.42Gly |  |  |  |  |  |
| 7.43Tyr |  |  |  |  |  |
| 71Val |  |  |  |  |  |
| 74Phe |  |  |  |  |  |
| 75Ser |  |  |  |  |  |
| Nemonapride | 1.58Leu | 3.32Asp | 2.53Val | 2.61Val | 2.42Leu | 2.41Tyr | 1.58Leu |
| 159Ile | 2.61Val | 3.32Asp | 38Thr | 2.43Val | 2.42Leu |
| 2.41Tyr | 3.32Asp | 3.36Cys | 6.55His | 6.48Trp | 2.50Asp |
| 2.42Leu | 3.36Cys | 5.42Ser |  | 6.51Phe | 6.48Trp |
| 2.43Val | 5.42Ser | 6.48Trp |  | 7.43Tyr |  |
| 2.44Val | 5.46Ser | 7.43Tyr |  | 74Phe |  |
| 2.45Ser | 6.48Trp | 75Ser |  |  |  |
| 2.46Leu | 6.55His |  |  |  |  |
| 2.47Ala | 7.42Gly |  |  |  |  |
| 2.48Val | 7.43Tyr |  |  |  |  |
| 2.50Asp | 75Ser |  |  |  |  |
| 2.53Val |  |  |  |  |  |
| 2.57Val |  |  |  |  |  |
| 2.61Val |  |  |  |  |  |
| 2.64Leu |  |  |  |  |  |
| 3.28Phe |  |  |  |  |  |
| 3.29Val |  |  |  |  |  |
| 3.32Asp |  |  |  |  |  |
| 3.33Val |  |  |  |  |  |
| 3.35Met |  |  |  |  |  |
| 3.36Cys |  |  |  |  |  |
| 3.39Ser |  |  |  |  |  |
| 34Arg |  |  |  |  |  |
| 35Ala |  |  |  |  |  |
| 38Thr |  |  |  |  |  |
| 5.38Phe |  |  |  |  |  |
| 5.39Val |  |  |  |  |  |
| 5.42Ser |  |  |  |  |  |
| 5.46Ser |  |  |  |  |  |
| 6.44Phe |  |  |  |  |  |
| 6.48Trp |  |  |  |  |  |
| 6.51Phe |  |  |  |  |  |
| 6.52Phe |  |  |  |  |  |
| 6.55His |  |  |  |  |  |
| 7.38Thr |  |  |  |  |  |
| 7.39Thr |  |  |  |  |  |
| 7.42Gly |  |  |  |  |  |
| 7.43Tyr |  |  |  |  |  |
| 70Gly |  |  |  |  |  |
| 73Asn |  |  |  |  |  |
| 75Ser |  |  |  |  |  |
| Sulpiride | 1.58Leu | 3.32Asp | 1.58Leu | 2.45Ser | 1.39Tyr | 2.45Ser | 2.43Val |
| 158Ser | 2.45Ser | 2.49Ala | 2.48Val | 2.50Asp | 2.44Val |
| 159Ile | 2.48Val | 3.32Asp | 38Thr | 3.28Phe | 2.48Val |
| 2.41Tyr | 2.49Ala | 38Thr | 5.38Phe | 38Thr | 38Thr |
| 2.42Leu | 3.32Asp | 5.39Val | 6.48Trp | 6.48Trp | 5.38Phe |
| 2.44Val | 3.36Cys | 5.42Ser | 6.55His | 6.51Phe | 6.51Phe |
| 2.45Ser | 38Thr | 5.46Ser |  | 6.55His | 6.52Phe |
| 2.46Leu | 5.39Val | 6.48Trp |  |  |  |
| 2.47Ala | 5.42Ser | 7.43Tyr |  |  |  |
| 2.48Val | 5.43Ser | 74Phe |  |  |  |
| 2.49Ala | 5.46Ser |  |  |  |  |
| 2.50Asp | 6.48Trp |  |  |  |  |
| 2.53Val | 6.55His |  |  |  |  |
| 2.57Val | 7.39Thr |  |  |  |  |
| 2.61Val | 7.43Tyr |  |  |  |  |
| 3.28Phe |  |  |  |  |  |
| 3.29Val |  |  |  |  |  |
| 3.32Asp |  |  |  |  |  |
| 3.33Val |  |  |  |  |  |
| 3.35Met |  |  |  |  |  |
| 3.36Cys |  |  |  |  |  |
| 34Arg |  |  |  |  |  |
| 35Ala |  |  |  |  |  |
| 38Thr |  |  |  |  |  |
| 5.38Phe |  |  |  |  |  |
| 5.39Val |  |  |  |  |  |
| 5.42Ser |  |  |  |  |  |
| 6.44Phe |  |  |  |  |  |
| 6.48Trp |  |  |  |  |  |
| 6.51Phe |  |  |  |  |  |
| 6.52Phe |  |  |  |  |  |
| 6.55His |  |  |  |  |  |
| 69Gly |  |  |  |  |  |
| 7.35Tyr |  |  |  |  |  |
| 7.36Ser |  |  |  |  |  |
| 7.39Thr |  |  |  |  |  |
| 7.43Tyr |  |  |  |  |  |
| 70Gly |  |  |  |  |  |
| 73Asn |  |  |  |  |  |
| 74Phe |  |  |  |  |  |
| SCH23390 | 1.58Leu | 3.32Asp | 1.58Leu | 2.48Val | 2.48Val | 2.44Val | 2.42Leu |
| 159Ile | 2.42Leu | 5.38Phe | 34Arg | 34Arg | 2.45Ser |
| 2.42Leu | 2.48Val | 5.43Ser | 6.55His | 5.38Phe | 2.47Ala |
| 2.43Val | 3.36Cys |  |  | 6.51Phe | 2.48Val |
| 2.44Val | 5.39Val |  |  | 6.55His | 34Arg |
| 2.45Ser | 5.42Ser |  |  |  | 35Ala |
| 2.46Leu | 5.43Ser |  |  |  | 38Thr |
| 2.47Ala | 6.48Trp |  |  |  | 6.48Trp |
| 2.48Val | 7.39Thr |  |  |  | 6.51Phe |
| 2.53Val | 7.43Tyr |  |  |  | 6.52Phe |
| 2.57Val |  |  |  |  | 6.55His |
| 3.29Val |  |  |  |  |  |
| 3.32Asp |  |  |  |  |  |
| 3.33Val |  |  |  |  |  |
| 3.35Met |  |  |  |  |  |
| 3.36Cys |  |  |  |  |  |
| 34Arg |  |  |  |  |  |
| 35Ala |  |  |  |  |  |
| 38Thr |  |  |  |  |  |
| 5.38Phe |  |  |  |  |  |
| 5.39Val |  |  |  |  |  |
| 5.42Ser |  |  |  |  |  |
| 6.48Trp |  |  |  |  |  |
| 6.51Phe |  |  |  |  |  |
| 6.52Phe |  |  |  |  |  |
| 6.55His |  |  |  |  |  |
| 7.35Tyr |  |  |  |  |  |
| 7.39Thr |  |  |  |  |  |
| 7.43Tyr |  |  |  |  |  |
| 70Gly |  |  |  |  |  |
| 74Phe |  |  |  |  |  |
| SKF38393 | 1.58Leu | 3.32Asp | 159Ile | 2.49Ala | 2.48Val | 2.44Val | 1.58Leu |
| 159Ile | 2.49Ala | 3.32Asp | 6.51Phe | 35Ala | 2.45Ser |
| 2.41Tyr | 2.50Asp | 3.33Val | 6.55His | 38Thr | 2.48Val |
| 2.42Leu | 3.32Asp | 5.39Val |  | 5.38Phe | 6.52Phe |
| 2.43Val | 5.39Val | 5.42Ser |  | 6.48Trp |  |
| 2.44Val | 5.42Ser | 5.43Ser |  | 6.51Phe |  |
| 2.45Ser | 5.43Ser | 6.51Phe |  | 6.52Phe |  |
| 2.46Leu | 5.46Ser |  |  | 6.55His |  |
| 2.47Ala | 6.51Phe |  |  |  |  |
| 2.48Val | 6.55His |  |  |  |  |
| 2.49Ala |  |  |  |  |  |
| 2.50Asp |  |  |  |  |  |
| 2.57Val |  |  |  |  |  |
| 3.32Asp |  |  |  |  |  |
| 3.33Val |  |  |  |  |  |
| 3.36Cys |  |  |  |  |  |
| 34Arg |  |  |  |  |  |
| 35Ala |  |  |  |  |  |
| 5.38Phe |  |  |  |  |  |
| 5.39Val |  |  |  |  |  |
| 5.42Ser |  |  |  |  |  |
| 5.46Ser |  |  |  |  |  |
| 5.47Phe |  |  |  |  |  |
| 6.48Trp |  |  |  |  |  |
| 6.51Phe |  |  |  |  |  |
| 6.52Phe |  |  |  |  |  |
| 6.55His |  |  |  |  |  |
| 70Gly |  |  |  |  |  |
| Eticlopride | 1.54Cys | 3.32Asp | 1.58Leu | 1.58Leu | 2.48Val | 2.45Ser | 38Thr |
| 1.58Leu | 2.42Leu | 3.32Asp | 6.52Phe | 6.51Phe | 7.35Tyr |
| 157Cys | 2.43Val | 38Thr | 6.55His | 6.52Phe |  |
| 158Ser | 3.32Asp | 6.55His |  |  |  |
| 159Ile | 3.36Cys | 7.43Tyr |  |  |  |
| 2.41Tyr | 38Thr | 74Phe |  |  |  |
| 2.42Leu | 6.48Trp |  |  |  |  |
| 2.43Val | 6.55His |  |  |  |  |
| 2.44Val | 7.43Tyr |  |  |  |  |
| 2.45Ser | 74Phe |  |  |  |  |
| 2.46Leu |  |  |  |  |  |
| 2.47Ala |  |  |  |  |  |
| 2.48Val |  |  |  |  |  |
| 2.50Asp |  |  |  |  |  |
| 2.53Val |  |  |  |  |  |
| 2.57Val |  |  |  |  |  |
| 2.61Val |  |  |  |  |  |
| 2.65Glu |  |  |  |  |  |
| 3.28Phe |  |  |  |  |  |
| 3.29Val |  |  |  |  |  |
| 3.32Asp |  |  |  |  |  |
| 3.33Val |  |  |  |  |  |
| 3.35Met |  |  |  |  |  |
| 3.36Cys |  |  |  |  |  |
| 34Arg |  |  |  |  |  |
| 35Ala |  |  |  |  |  |
| 38Thr |  |  |  |  |  |
| 5.39Val |  |  |  |  |  |
| 5.42Ser |  |  |  |  |  |
| 5.46Ser |  |  |  |  |  |
| 6.48Trp |  |  |  |  |  |
| 6.51Phe |  |  |  |  |  |
| 6.52Phe |  |  |  |  |  |
| 6.55His |  |  |  |  |  |
| 69Gly |  |  |  |  |  |
| 7.39Thr |  |  |  |  |  |
| 7.43Tyr |  |  |  |  |  |
| 70Gly |  |  |  |  |  |
| 73Asn |  |  |  |  |  |
| 74Phe |  |  |  |  |  |
| 75Ser |  |  |  |  |  |
| Risperidone | 1.58Leu |  | 159Ile | 159Ile | 2.48Val | 2.42Leu | 1.58Leu |
| 158Ser | 2.43Val | 2.43Val | 6.55His | 2.45Ser | 35Ala |
| 159Ile | 2.48Val | 3.32Asp |  | 2.46Leu | 6.48Trp |
| 2.41Tyr | 2.50Asp | 38Thr |  | 34Arg |  |
| 2.42Leu | 2.61Val | 6.48Trp |  | 6.44Phe |  |
| 2.43Val | 3.32Asp | 6.55His |  | 6.48Trp |  |
| 2.44Val | 3.36Cys | 7.43Tyr |  | 6.51Phe |  |
| 2.45Ser | 38Thr | 74Phe |  | 6.55His |  |
| 2.46Leu | 6.48Trp |  |  | 7.43Tyr |  |
| 2.48Val | 6.51Phe |  |  |  |  |
| 2.50Asp | 6.55His |  |  |  |  |
| 2.53Val | 7.39Thr |  |  |  |  |
| 2.57Val | 7.43Tyr |  |  |  |  |
| 2.61Val | 74Phe |  |  |  |  |
| 2.64Leu |  |  |  |  |  |
| 2.65Glu |  |  |  |  |  |
| 3.28Phe |  |  |  |  |  |
| 3.29Val |  |  |  |  |  |
| 3.32Asp |  |  |  |  |  |
| 3.33Val |  |  |  |  |  |
| 3.35Met |  |  |  |  |  |
| 3.36Cys |  |  |  |  |  |
| 34Arg |  |  |  |  |  |
| 35Ala |  |  |  |  |  |
| 38Thr |  |  |  |  |  |
| 39Thr |  |  |  |  |  |
| 5.38Phe |  |  |  |  |  |
| 5.39Val |  |  |  |  |  |
| 5.42Ser |  |  |  |  |  |
| 5.46Ser |  |  |  |  |  |
| 5.47Phe |  |  |  |  |  |
| 6.44Phe |  |  |  |  |  |
| 6.47Cys |  |  |  |  |  |
| 6.48Trp |  |  |  |  |  |
| 6.51Phe |  |  |  |  |  |
| 6.52Phe |  |  |  |  |  |
| 6.55His |  |  |  |  |  |
| 69Gly |  |  |  |  |  |
| 7.35Tyr |  |  |  |  |  |
| 7.38Thr |  |  |  |  |  |
| 7.39Thr |  |  |  |  |  |
| 7.42Gly |  |  |  |  |  |
| 7.43Tyr |  |  |  |  |  |
| 71Val |  |  |  |  |  |
| 75Ser |  |  |  |  |  |
| Aripiprazole | 1.39Tyr |  | 159Ile | 159Ile | 2.48Val | 2.46Leu | 2.41Tyr |
| 1.58Leu | 2.48Val | 2.61Val | 2.50Asp | 2.50Asp | 3.28Phe |
| 158Ser | 2.49Ala | 38Thr | 38Thr | 2.61Val | 6.48Trp |
| 159Ile | 2.61Val | 5.39Val |  | 34Arg | 6.51Phe |
| 2.42Leu | 3.32Asp | 5.42Ser |  | 6.51Phe | 7.35Tyr |
| 2.43Val | 3.37Thr | 5.46Ser |  | 6.52Phe | 7.43Tyr |
| 2.44Val | 38Thr | 7.43Tyr |  | 7.43Tyr |  |
| 2.45Ser | 5.39Val | 75Ser |  | 74Phe |  |
| 2.46Leu | 5.42Ser |  |  |  |  |
| 2.47Ala | 5.43Ser |  |  |  |  |
| 2.48Val | 5.46Ser |  |  |  |  |
| 2.49Ala | 6.47Cys |  |  |  |  |
| 2.53Val | 6.55His |  |  |  |  |
| 2.57Val | 7.43Tyr |  |  |  |  |
| 2.61Val | 75Ser |  |  |  |  |
| 2.64Leu |  |  |  |  |  |
| 2.65Glu |  |  |  |  |  |
| 2.66Val |  |  |  |  |  |
| 3.28Phe |  |  |  |  |  |
| 3.29Val |  |  |  |  |  |
| 3.32Asp |  |  |  |  |  |
| 3.33Val |  |  |  |  |  |
| 3.35Met |  |  |  |  |  |
| 3.36Cys |  |  |  |  |  |
| 34Arg |  |  |  |  |  |
| 35Ala |  |  |  |  |  |
| 5.38Phe |  |  |  |  |  |
| 5.39Val |  |  |  |  |  |
| 5.42Ser |  |  |  |  |  |
| 5.46Ser |  |  |  |  |  |
| 6.47Cys |  |  |  |  |  |
| 6.48Trp |  |  |  |  |  |
| 6.51Phe |  |  |  |  |  |
| 6.52Phe |  |  |  |  |  |
| 6.55His |  |  |  |  |  |
| 7.32Pro |  |  |  |  |  |
| 7.35Tyr |  |  |  |  |  |
| 7.36Ser |  |  |  |  |  |
| 7.38Thr |  |  |  |  |  |
| 7.39Thr |  |  |  |  |  |
| 7.42Gly |  |  |  |  |  |
| 7.43Tyr |  |  |  |  |  |
| 70Gly |  |  |  |  |  |
| 71Val |  |  |  |  |  |
| 74Phe |  |  |  |  |  |
| 75Ser |  |  |  |  |  |
| Haloperidole | 1.58Leu |  | 1.58Leu | 159Ile | 2.48Val | 2.50Asp | 2.48Val |
| 159Ile | 159Ile | 3.32Asp | 6.48Trp | 35Ala |
| 2.41Tyr | 2.41Tyr | 5.42Ser | 6.51Phe | 5.47Phe |
| 2.42Leu | 3.29Val | 5.46Ser | 6.55His | 6.52Phe |
| 2.43Val | 3.32Asp | 7.43Tyr |  | 6.55His |
| 2.44Val | 3.33Val | 71Val |  |  |
| 2.45Ser | 3.36Cys |  |  |  |
| 2.46Leu | 35Ala |  |  |  |
| 2.47Ala | 5.42Ser |  |  |  |
| 2.48Val | 5.43Ser |  |  |  |
| 2.50Asp | 5.46Ser |  |  |  |
| 2.53Val | 6.48Trp |  |  |  |
| 2.61Val | 6.55His |  |  |  |
| 2.65Glu | 7.43Tyr |  |  |  |
| 2.66Val | 71Val |  |  |  |
| 3.28Phe |  |  |  |  |
| 3.29Val |  |  |  |  |
| 3.32Asp |  |  |  |  |
| 3.33Val |  |  |  |  |
| 3.36Cys |  |  |  |  |
| 34Arg |  |  |  |  |
| 35Ala |  |  |  |  |
| 38Thr |  |  |  |  |
| 5.38Phe |  |  |  |  |
| 5.39Val |  |  |  |  |
| 5.42Ser |  |  |  |  |
| 5.43Ser |  |  |  |  |
| 5.46Ser |  |  |  |  |
| 5.47Phe |  |  |  |  |
| 6.48Trp |  |  |  |  |
| 6.51Phe |  |  |  |  |
| 6.52Phe |  |  |  |  |
| 6.55His |  |  |  |  |
| 7.35Tyr |  |  |  |  |
| 7.39Thr |  |  |  |  |
| 7.43Tyr |  |  |  |  |
| 71Val |  |  |  |  |
| 73Asn |  |  |  |  |
| Spiperone | 1.39Tyr | 1.44Leu | 1.43Ile | 3.52Thr | 152Gly | 1.35Tyr | 2.42Leu |
| 1.44Leu | 75Ser | 2.48Val | 38Thr | 159Ile | 2.64Leu |
| 1.58Leu |  | 2.50Asp | 5.57Val | 2.61Val | 35Ala |
| 110Met |  | 3.24Cys | 7.43Tyr | 6.51Phe | 6.48Trp |
| 152Gly |  | 3.27Val | 72Trp |  | 75Ser |
| 155Thr |  | 3.33Val |  |  |  |
| 156Val |  | 3.36Cys |  |  |  |
| 157Cys |  | 3.52Thr |  |  |  |
| 159Ile |  | 38Thr |  |  |  |
| 1Gln |  | 3Arg |  |  |  |
| 2.42Leu |  | 5.57Val |  |  |  |
| 2.43Val |  | 6.48Trp |  |  |  |
| 2.44Val |  | 6.55His |  |  |  |
| 2.45Ser |  | 70Gly |  |  |  |
| 2.46Leu |  | 72Trp |  |  |  |
| 2.47Ala |  |  |  |  |  |
| 2.48Val |  |  |  |  |  |
| 2.50Asp |  |  |  |  |  |
| 2.53Val |  |  |  |  |  |
| 2.57Val |  |  |  |  |  |
| 2.61Val |  |  |  |  |  |
| 2.64Leu |  |  |  |  |  |
| 2.65Glu |  |  |  |  |  |
| 2Ala |  |  |  |  |  |
| 3.23Ile |  |  |  |  |  |
| 3.24Cys |  |  |  |  |  |
| 3.27Val |  |  |  |  |  |
| 3.28Phe |  |  |  |  |  |
| 3.31Leu |  |  |  |  |  |
| 3.32Asp |  |  |  |  |  |
| 3.33Val |  |  |  |  |  |
| 3.36Cys |  |  |  |  |  |
| 3.52Thr |  |  |  |  |  |
| 34Arg |  |  |  |  |  |
| 35Ala |  |  |  |  |  |
| 38Thr |  |  |  |  |  |
| 3Arg |  |  |  |  |  |
| 5.38Phe |  |  |  |  |  |
| 5.42Ser |  |  |  |  |  |
| 5.53Val |  |  |  |  |  |
| 5.56Leu |  |  |  |  |  |
| 5.57Val |  |  |  |  |  |
| 6.48Trp |  |  |  |  |  |
| 6.51Phe |  |  |  |  |  |
| 6.52Phe |  |  |  |  |  |
| 7.38Thr |  |  |  |  |  |
| 7.39Thr |  |  |  |  |  |
| 7.42Gly |  |  |  |  |  |
| 7.43Tyr |  |  |  |  |  |
| 70Gly |  |  |  |  |  |
| 71Val |  |  |  |  |  |
| 72Trp |  |  |  |  |  |
| 73Asn |  |  |  |  |  |
| 74Phe |  |  |  |  |  |
| 75Ser |  |  |  |  |  |
| Chlorpromazine | 1.54Cys |  | 6.48Trp |  | 2.48Val | 2.14Tyr | 1.58Leu |
| 1.58Leu | 7.43Tyr | 34Arg | 2.42Leu |
| 158Ser | 75Ser | 6.51Phe | 2.43Val |
| 159Ile |  |  | 2.44Val |
| 2.39Thr |  |  | 2.45Ser |
| 2.41Tyr |  |  | 2.48Val |
| 2.42Leu |  |  | 6.48Trp |
| 2.43Val |  |  | 6.51Phe |
| 2.44Val |  |  |  |
| 2.45Ser |  |  |  |
| 2.46Leu |  |  |  |
| 2.47Ala |  |  |  |
| 2.48Val |  |  |  |
| 2.53Val |  |  |  |
| 2.56Leu |  |  |  |
| 2.57Val |  |  |  |
| 2.61Val |  |  |  |
| 3.28Phe |  |  |  |
| 3.29Val |  |  |  |
| 3.32Asp |  |  |  |
| 3.33Val |  |  |  |
| 3.35Met |  |  |  |
| 3.36Cys |  |  |  |
| 3.40Ile |  |  |  |
| 34Arg |  |  |  |
| 35Ala |  |  |  |
| 38Thr |  |  |  |
| 5.38Phe |  |  |  |
| 5.39Val |  |  |  |
| 5.42Ser |  |  |  |
| 5.46Ser |  |  |  |
| 5.47Phe |  |  |  |
| 6.44Phe |  |  |  |
| 6.48Trp |  |  |  |
| 6.51Phe |  |  |  |
| 6.52Phe |  |  |  |
| 6.55His |  |  |  |
| 7.38Thr |  |  |  |
| 7.39Thr |  |  |  |
| 7.42Gly |  |  |  |
| 7.43Tyr |  |  |  |
| 71Val |  |  |  |
| 73Asn |  |  |  |
| 74Phe |  |  |  |
| 75Ser |  |  |  |

**Table S12 - D4R residues with Ballesteros & Weinstein-numbering** [4] **participating in different interaction types sorted by ligands.** Data was summarized for all time points. Abbreviations: Hydrocontacts – hydrophobic contacts; SB – salt-bridges; 2.5 Å – 2.5 Å-interactions; HB – hydrogen bonds; cat-π – cat-π-interactions, T-stack – T-stacking-interactions; π-π-stack – π-π-stacking-interactions. Duplicate residues per interaction type are colored red, while unique residues per interaction type are colored green.

| Interaction type | Hydrocontacts | SB | 2.5 Å | HB | Cat-π | T-stack | π-π-stack |
| --- | --- | --- | --- | --- | --- | --- | --- |
| Dopamine | 156Arg | 3.32Asp | 156Arg | 3.32Asp | 6.55His | 6.52Phe | 6.52Phe |
| 157Leu |  | 3.32Asp | 5.42Ser | only at timepoint 65 ns | 6.55His |  |
| 3.32Asp |  | 5.39Val | 5.43Ser |  |  | only at timepoint 65 ns |
| 3.33Val |  | 5.42Ser | 6.55His |  | only at timepoints 0 and 95 ns |  |
| 3.36Cys |  | 5.43Ser | 7.43Tyr |  |  |  |
| 3.37Thr |  | 5.46Ser |  |  |  |  |
| 5.39Val |  | 6.55His |  |  |  |  |
| 5.42Ser |  | 7.43Tyr |  |  |  |  |
| 5.43Ser |  |  |  |  |  |  |
| 5.46Ser |  |  |  |  |  |  |
| 6.48Trp |  |  |  |  |  |  |
| 6.51Phe |  |  |  |  |  |  |
| 6.52Phe |  |  |  |  |  |  |
| 6.55His |  |  |  |  |  |  |
| 7-OH-DPAT | 156Arg | 3.32Asp | 156Arg | 156Arg | 6.51Phe | 6.52Phe | 5.38Tyr |
| 157Leu |  | 3.36Cys | 5.38Tyr | 6.48Trp | 6.55His | 6.51Phe |
| 2.53Leu |  | 5.39Val | 5.39Val | 6.55His |  | 6.52Phe |
| 3.29Met |  | 5.42Ser | 5.42Ser |  |  | 6.55His |
| 3.32Asp |  | 5.43Ser | 5.43Ser |  |  |  |
| 3.33Val |  | 5.46Ser | 5.46Ser |  |  |  |
| 3.36Cys |  | 6.48Trp | 6.48Trp |  |  |  |
| 5.39Val |  | 6.55His | 6.55His |  |  |  |
| 5.42Ser |  |  |  |  |  |  |
| 5.43Ser |  |  |  |  |  |  |
| 5.46Ser |  |  |  |  |  |  |
| 5.47Phe |  |  |  |  |  |  |
| 6.48Trp |  |  |  |  |  |  |
| 6.51Phe |  |  |  |  |  |  |
| 6.52Phe |  |  |  |  |  |  |
| 6.55His |  |  |  |  |  |  |
| 7.39Thr |  |  |  |  |  |  |
| 7.42Gly |  |  |  |  |  |  |
| 7.43Tyr |  |  |  |  |  |  |
| Apomorphine | 156Arg |  | 156Arg | 156Arg | 156Arg | 6.48Trp | 6.52Phe |
| 157Leu |  | 3.36Cys | 5.42Ser | 6.55His | 6.51Phe | 6.55His |
| 3.29Met |  | 3.37Thr | 5.43Ser |  | 6.52Phe |  |
| 3.32Asp |  | 5.39Val | 5.46Ser |  | 6.55His |  |
| 3.33Val |  | 5.42Ser | 6.55His |  |  |  |
| 3.36Cys |  | 5.43Ser |  |  |  |  |
| 3.37Thr |  | 5.46Ser |  |  |  |  |
| 3.40Ile |  | 6.55His |  |  |  |  |
| 4.56Val |  |  |  |  |  |  |
| 5.39Val |  |  |  |  |  |  |
| 5.42Ser |  |  |  |  |  |  |
| 5.43Ser |  |  |  |  |  |  |
| 5.46Ser |  |  |  |  |  |  |
| 6.44Phe |  |  |  |  |  |  |
| 6.48Trp |  |  |  |  |  |  |
| 6.51Phe |  |  |  |  |  |  |
| 6.52Phe |  |  |  |  |  |  |
| 6.55His |  |  |  |  |  |  |
| 7.35Val |  |  |  |  |  |  |
| 7.38Val |  |  |  |  |  |  |
| 7.39Thr |  |  |  |  |  |  |
| 7.43Tyr |  |  |  |  |  |  |
| Bromocriptine | 156Arg |  | 156Arg | 156Arg | 156Arg | 6.48Trp | 6.48Trp |
| 157Leu |  | 157Leu | 157Leu | 6.55His |  | 6.51Phe |
| 2.53Leu |  | 2.53Leu | 3.32Asp |  |  | 6.52Phe |
| 3.29Met |  | 3.29Met | 3.36Cys |  |  | 6.55His |
| 3.32Asp |  | 3.32Asp | 4.56Val |  |  |  |
| 3.33Val |  | 3.33Val | 5.36Arg |  |  |  |
| 3.36Cys |  | 3.36Cys | 5.43Ser |  |  |  |
| 3.37Thr |  | 3.37Thr | 6.48Trp |  |  |  |
| 3.39Ser |  | 3.40Ile | 6.55His |  |  |  |
| 3.40Ile |  | 3.41Phe | 7.38Val |  |  |  |
| 3.41Phe |  | 4.52Leu | 7.39Thr |  |  |  |
| 4.52Leu |  | 4.56Val | 7.43Tyr |  |  |  |
| 4.53Ser |  | 5.36Arg |  |  |  |  |
| 4.56Val |  | 5.38Tyr |  |  |  |  |
| 5.36Arg |  | 5.39Val |  |  |  |  |
| 5.38Tyr |  | 5.42Ser |  |  |  |  |
| 5.39Val |  | 5.43Ser |  |  |  |  |
| 5.40Val |  | 5.45Cys |  |  |  |  |
| 5.41Tyr |  | 5.46Ser |  |  |  |  |
| 5.42Ser |  | 5.47Phe |  |  |  |  |
| 5.43Ser |  | 6.44Phe |  |  |  |  |
| 5.45Cys |  | 6.48Trp |  |  |  |  |
| 5.46Ser |  | 6.51Phe |  |  |  |  |
| 5.47Phe |  | 6.52Phe |  |  |  |  |
| 5.48Phe |  | 6.55His |  |  |  |  |
| 6.44Phe |  | 6.56Ile |  |  |  |  |
| 6.48Trp |  | 7.35Val |  |  |  |  |
| 6.51Phe |  | 7.38Val |  |  |  |  |
| 6.52Phe |  | 7.39Thr |  |  |  |  |
| 6.54Val |  | 7.42Gly |  |  |  |  |
| 6.55His |  | 7.43Tyr |  |  |  |  |
| 6.56Ile |  |  |  |  |  |  |
| 7.35Val |  |  |  |  |  |  |
| 7.36Ser |  |  |  |  |  |  |
| 7.38Val |  |  |  |  |  |  |
| 7.39Thr |  |  |  |  |  |  |
| 7.42Gly |  |  |  |  |  |  |
| 7.43Tyr |  |  |  |  |  |  |
| Clozapine | 155Cys |  | 156Arg | 156Arg | 156Arg | 6.48Trp | 6.48Trp |
| 156Arg |  | 157Leu | 3.33Val | 6.55His | 6.51Phe | 6.51Phe |
| 157Leu |  | 3.32Asp | 5.42Ser |  | 6.52Phe | 6.55His |
| 2.53Leu |  | 3.33Val | 5.46Ser |  | 7.43Tyr |  |
| 3.29Met |  | 3.36Cys | 6.55His |  |  |  |
| 3.32Asp |  | 5.39Val | 7.43Tyr |  |  |  |
| 3.33Val |  | 5.42Ser |  |  |  |  |
| 3.36Cys |  | 5.46Ser |  |  |  |  |
| 3.37Thr |  | 6.48Trp |  |  |  |  |
| 3.40Ile |  | 6.51Phe |  |  |  |  |
| 4.56Val |  | 6.52Phe |  |  |  |  |
| 5.38Tyr |  | 6.55His |  |  |  |  |
| 5.39Val |  | 7.43Tyr |  |  |  |  |
| 5.42Ser |  |  |  |  |  |  |
| 5.43Ser |  |  |  |  |  |  |
| 5.46Ser |  |  |  |  |  |  |
| 6.44Phe |  |  |  |  |  |  |
| 6.47Cys |  |  |  |  |  |  |
| 6.48Trp |  |  |  |  |  |  |
| 6.51Phe |  |  |  |  |  |  |
| 6.52Phe |  |  |  |  |  |  |
| 6.55His |  |  |  |  |  |  |
| 7.35Val |  |  |  |  |  |  |
| 7.38Val |  |  |  |  |  |  |
| 7.39Thr |  |  |  |  |  |  |
| 7.42Gly |  |  |  |  |  |  |
| 7.43Tyr |  |  |  |  |  |  |
| Nemonapride | 154Val | 3.32Asp | 156Arg | 156Arg | 6.51Phe | 6.48Trp | 6.48Trp |
| 155Cys |  | 3.32Asp | 3.32Asp | 6.55His | 6.51Phe | 6.51Phe |
| 156Arg |  | 3.36Cys | 5.42Ser | 7.43Tyr | 6.52Phe | 7.43Tyr |
| 157Leu |  | 5.42Ser | 5.46Ser |  | 6.55His |  |
| 2.53Leu |  | 5.46Ser | 6.48Trp |  | 7.43Tyr |  |
| 2.57Val |  | 6.48Trp | 7.42Gly |  |  |  |
| 2.58Leu |  | 6.55His | 7.43Tyr |  |  |  |
| 2.61Phe |  | 7.42Gly |  |  |  |  |
| 3.28Leu |  | 7.43Tyr |  |  |  |  |
| 3.29Met |  | 7.46Ser |  |  |  |  |
| 3.32Asp |  |  |  |  |  |  |
| 3.33Val |  |  |  |  |  |  |
| 3.35Leu |  |  |  |  |  |  |
| 3.36Cys |  |  |  |  |  |  |
| 3.37Thr |  |  |  |  |  |  |
| 3.39Ser |  |  |  |  |  |  |
| 4.56Val |  |  |  |  |  |  |
| 5.38Tyr |  |  |  |  |  |  |
| 5.39Val |  |  |  |  |  |  |
| 5.42Ser |  |  |  |  |  |  |
| 5.43Ser |  |  |  |  |  |  |
| 5.46Ser |  |  |  |  |  |  |
| 5.47Phe |  |  |  |  |  |  |
| 6.44Phe |  |  |  |  |  |  |
| 6.48Trp |  |  |  |  |  |  |
| 6.51Phe |  |  |  |  |  |  |
| 6.52Phe |  |  |  |  |  |  |
| 6.55His |  |  |  |  |  |  |
| 7.39Thr |  |  |  |  |  |  |
| 7.42Gly |  |  |  |  |  |  |
| 7.43Tyr |  |  |  |  |  |  |
| 7.45Asn |  |  |  |  |  |  |
| 7.46Ser |  |  |  |  |  |  |
| Sulpiride | 154Val | 3.32Asp | 156Arg | 156Arg | 6.52Phe | 6.48Trp | 154Val |
| 155Cys |  | 3.29Met | 3.32Asp | 6.55His | 6.51Phe | 155Cys |
| 156Arg |  | 3.32Asp | 5.42Ser |  | 6.52Phe | 156Arg |
| 157Leu |  | 3.33Val | 5.43Ser |  |  | 157Leu |
| 2.53Leu |  | 3.36Cys | 5.46Ser |  |  | 2.53Leu |
| 2.57Val |  | 4.56Val | 6.48Trp |  |  | 2.57Val |
| 3.29Met |  | 5.39Val | 6.55His |  |  | 3.29Met |
| 3.32Asp |  | 5.42Ser | 7.43Tyr |  |  | 3.32Asp |
| 3.33Val |  | 5.43Ser |  |  |  | 3.33Val |
| 3.35Leu |  | 5.46Ser |  |  |  | 3.35Leu |
| 3.36Cys |  | 6.48Trp |  |  |  | 3.36Cys |
| 3.39Ser |  | 6.51Phe |  |  |  | 3.39Ser |
| 4.56Val |  | 6.52Phe |  |  |  | 4.56Val |
| 5.38Tyr |  | 6.55His |  |  |  | 5.38Tyr |
| 5.39Val |  | 7.43Tyr |  |  |  | 5.39Val |
| 5.42Ser |  |  |  |  |  | 5.42Ser |
| 5.46Ser |  |  |  |  |  | 5.46Ser |
| 6.48Trp |  |  |  |  |  | 6.48Trp |
| 6.51Phe |  |  |  |  |  | 6.51Phe |
| 6.52Phe |  |  |  |  |  | 6.52Phe |
| 6.55His |  |  |  |  |  | 6.55His |
| 6.58Gln |  |  |  |  |  | 6.58Gln |
| 7.35Val |  |  |  |  |  | 7.35Val |
| 7.38Val |  |  |  |  |  | 7.38Val |
| 7.39Thr |  |  |  |  |  | 7.39Thr |
| 7.42Gly |  |  |  |  |  | 7.42Gly |
| 7.43Tyr |  |  |  |  |  | 7.43Tyr |
| SCH23390 | 155Cys | 3.32Asp | 156Arg | 156Arg | 156Arg | 6.51Phe | 6.51Phe |
| 156Arg |  | 157Leu | 3.32Asp | 6.51Phe | 6.52Phe | 6.52Phe |
| 157Leu |  | 3.32Asp | 5.42Ser | 6.52Phe | 6.55His | 6.55His |
| 3.29Met |  | 3.37Thr | 6.55His | 6.55His |  |  |
| 3.32Asp |  | 5.39Val |  |  |  |  |
| 3.33Val |  | 5.42Ser |  |  |  |  |
| 3.36Cys |  | 5.43Ser |  |  |  |  |
| 5.38Tyr |  | 5.46Ser |  |  |  |  |
| 5.39Val |  | 6.48Trp |  |  |  |  |
| 5.42Ser |  | 6.55His |  |  |  |  |
| 5.43Ser |  | 7.43Tyr |  |  |  |  |
| 5.46Ser |  |  |  |  |  |  |
| 5.47Phe |  |  |  |  |  |  |
| 6.48Trp |  |  |  |  |  |  |
| 6.51Phe |  |  |  |  |  |  |
| 6.52Phe |  |  |  |  |  |  |
| 6.55His |  |  |  |  |  |  |
| 7.39Thr |  |  |  |  |  |  |
| 7.43Tyr |  |  |  |  |  |  |
| SKF38393 | 155Cys | 3.32Asp | 156Arg | 3.32Asp | 156Arg | 5.47Phe | 6.44Phe |
| 156Arg |  | 3.32Asp | 5.39Val | 6.52Phe | 6.51Phe | 6.48Trp |
| 157Leu |  | 3.36Cys | 5.42Ser | 6.55His | 6.52Phe | 6.51Phe |
| 2.53Leu |  | 5.39Val | 5.43Ser |  | 6.55His | 6.52Phe |
| 3.29Met |  | 5.42Ser | 5.46Ser |  | 7.43Tyr |  |
| 3.32Asp |  | 5.43Ser | 7.42Gly |  |  |  |
| 3.33Val |  | 5.46Ser | 7.43Tyr |  |  |  |
| 3.36Cys |  | 6.55His |  |  |  |  |
| 5.38Tyr |  | 7.38Val |  |  |  |  |
| 5.39Val |  | 7.42Gly |  |  |  |  |
| 5.42Ser |  | 7.43Tyr |  |  |  |  |
| 5.43Ser |  |  |  |  |  |  |
| 5.46Ser |  |  |  |  |  |  |
| 6.48Trp |  |  |  |  |  |  |
| 6.51Phe |  |  |  |  |  |  |
| 6.52Phe |  |  |  |  |  |  |
| 6.55His |  |  |  |  |  |  |
| 7.38Val |  |  |  |  |  |  |
| 7.39Thr |  |  |  |  |  |  |
| 7.42Gly |  |  |  |  |  |  |
| 7.43Tyr |  |  |  |  |  |  |
| Eticlopride | 154Val | 2.50Asp | 156Arg | 156Arg | 156Arg | 6.48Trp |  |
| 155Cys | 3.32Asp | 157Leu | 3.32Asp | 6.51Phe | 6.51Phe |  |
| 156Arg |  | 3.32Asp | 3.33Val | 6.55His | 6.52Phe |  |
| 157Leu |  | 3.33Val | 6.55His |  | 6.55His |  |
| 2.53Leu |  | 3.36Cys | 7.43Tyr |  |  |  |
| 2.61Phe |  | 5.42Ser |  |  |  |  |
| 3.28Leu |  | 6.55His |  |  |  |  |
| 3.29Met |  | 7.43Tyr |  |  |  |  |
| 3.32Asp |  |  |  |  |  |  |
| 3.33Val |  |  |  |  |  |  |
| 3.35Leu |  |  |  |  |  |  |
| 3.36Cys |  |  |  |  |  |  |
| 3.37Thr |  |  |  |  |  |  |
| 3.39Ser |  |  |  |  |  |  |
| 5.38Tyr |  |  |  |  |  |  |
| 5.39Val |  |  |  |  |  |  |
| 5.42Ser |  |  |  |  |  |  |
| 5.43Ser |  |  |  |  |  |  |
| 5.46Ser |  |  |  |  |  |  |
| 6.48Trp |  |  |  |  |  |  |
| 6.51Phe |  |  |  |  |  |  |
| 6.52Phe |  |  |  |  |  |  |
| 6.55His |  |  |  |  |  |  |
| 7.39Thr |  |  |  |  |  |  |
| 7.42Gly |  |  |  |  |  |  |
| 7.43Tyr |  |  |  |  |  |  |
| 7.46Ser |  |  |  |  |  |  |
| Risperidone | 154Val |  | 156Arg | 156Arg | 156Arg | 6.51Phe | 5.38Tyr |
| 155Cys |  | 157Leu | 157Leu | 6.55His | 6.52Phe | 6.48Trp |
| 156Arg |  | 2.64Ser | 3.32Asp |  | 6.55His | 6.55His |
| 157Leu |  | 3.32Asp | 6.48Trp |  | 7.43Tyr |  |
| 2.53Leu |  | 3.36Cys | 6.55His |  |  |  |
| 2.61Phe |  | 3.37Thr | 7.43Tyr |  |  |  |
| 2.64Ser |  | 5.39Val |  |  |  |  |
| 2.65Glu |  | 5.42Ser |  |  |  |  |
| 3.28Leu |  | 5.43Ser |  |  |  |  |
| 3.29Met |  | 6.48Trp |  |  |  |  |
| 3.32Asp |  | 6.51Phe |  |  |  |  |
| 3.33Val |  | 6.52Phe |  |  |  |  |
| 3.35Leu |  | 6.55His |  |  |  |  |
| 3.36Cys |  | 7.43Tyr |  |  |  |  |
| 3.37Thr |  |  |  |  |  |  |
| 3.39Ser |  |  |  |  |  |  |
| 4.56Val |  |  |  |  |  |  |
| 5.38Tyr |  |  |  |  |  |  |
| 5.39Val |  |  |  |  |  |  |
| 5.42Ser |  |  |  |  |  |  |
| 5.43Ser |  |  |  |  |  |  |
| 5.46Ser |  |  |  |  |  |  |
| 6.44Phe |  |  |  |  |  |  |
| 6.48Trp |  |  |  |  |  |  |
| 6.51Phe |  |  |  |  |  |  |
| 6.52Phe |  |  |  |  |  |  |
| 6.54Val |  |  |  |  |  |  |
| 6.55His |  |  |  |  |  |  |
| 69Gly |  |  |  |  |  |  |
| 7.35Val |  |  |  |  |  |  |
| 7.36Ser |  |  |  |  |  |  |
| 7.39Thr |  |  |  |  |  |  |
| 7.42Gly |  |  |  |  |  |  |
| 7.43Tyr |  |  |  |  |  |  |
| 7.45Asn |  |  |  |  |  |  |
| 71Trp |  |  |  |  |  |  |
| Aripiprazole | 154Val |  | 156Arg | 156Arg | 156Arg | 6.48Trp | 6.48Trp |
| 156Arg |  | 1Ala | 5.36Arg |  | 6.51Phe | 7.43Tyr |
| 157Leu |  | 3.31Met | 5.42Ser |  | 6.52Phe |  |
| 2.53Leu |  | 3.32Asp | 5.43Ser |  | 7.43Tyr |  |
| 2.57Val |  | 3.36Cys | 5.46Ser |  |  |  |
| 2.61Phe |  | 3.37Thr | 6.48Trp |  |  |  |
| 2.64Ser |  | 5.36Arg |  |  |  |  |
| 3.28Leu |  | 5.39Val |  |  |  |  |
| 3.29Met |  | 5.42Ser |  |  |  |  |
| 3.32Asp |  | 5.43Ser |  |  |  |  |
| 3.33Val |  | 5.46Ser |  |  |  |  |
| 3.36Cys |  | 6.48Trp |  |  |  |  |
| 3.37Thr |  | 6.55His |  |  |  |  |
| 4.56Val |  | 7.43Tyr |  |  |  |  |
| 5.39Val |  | 70Ala |  |  |  |  |
| 5.42Ser |  |  |  |  |  |  |
| 5.43Ser |  |  |  |  |  |  |
| 5.46Ser |  |  |  |  |  |  |
| 6.48Trp |  |  |  |  |  |  |
| 6.51Phe |  |  |  |  |  |  |
| 6.52Phe |  |  |  |  |  |  |
| 6.55His |  |  |  |  |  |  |
| 7.38Val |  |  |  |  |  |  |
| 7.39Thr |  |  |  |  |  |  |
| 7.42Gly |  |  |  |  |  |  |
| 7.43Tyr |  |  |  |  |  |  |
| 7.46Ser |  |  |  |  |  |  |
| Haloperidole | 154Val |  | 156Arg | 156Arg |  |  |  |
| 156Arg |  | 157Leu |  |  |  |  |
| 157Leu |  | 2.64Ser |  |  |  |  |
| 2.53Leu |  | 3.32Asp |  |  |  |  |
| 2.57Val |  | 3.36Cys |  |  |  |  |
| 2.60Leu |  | 5.36Arg |  |  |  |  |
| 2.61Phe |  | 5.42Ser |  |  |  |  |
| 2.64Ser |  | 6.48Trp |  |  |  |  |
| 3.28Leu |  | 6.55His |  |  |  |  |
| 3.29Met |  | 7.42Gly |  |  |  |  |
| 3.32Asp |  | 7.43Tyr |  |  |  |  |
| 3.33Val |  | 7.46Ser |  |  |  |  |
| 3.36Cys |  |  |  |  |  |  |
| 3.37Thr |  |  |  |  |  |  |
| 3.40Ile |  |  |  |  |  |  |
| 4.56Val |  |  |  |  |  |  |
| 5.38Tyr |  |  |  |  |  |  |
| 5.39Val |  |  |  |  |  |  |
| 5.41Tyr |  |  |  |  |  |  |
| 5.42Ser |  |  |  |  |  |  |
| 5.43Ser |  |  |  |  |  |  |
| 5.45Cys |  |  |  |  |  |  |
| 5.46Ser |  |  |  |  |  |  |
| 5.47Phe |  |  |  |  |  |  |
| 6.44Phe |  |  |  |  |  |  |
| 6.48Trp |  |  |  |  |  |  |
| 6.51Phe |  |  |  |  |  |  |
| 6.52Phe |  |  |  |  |  |  |
| 6.55His |  |  |  |  |  |  |
| 7.36Ser |  |  |  |  |  |  |
| 7.39Thr |  |  |  |  |  |  |
| 7.42Gly |  |  |  |  |  |  |
| 7.43Tyr |  |  |  |  |  |  |
| 7.45Asn |  |  |  |  |  |  |
| 7.46Ser |  |  |  |  |  |  |
| Spiperone | 154Val | 3.32Asp | 156Arg | 156Arg | 156Arg | 6.48Trp | 6.48Trp |
| 155Cys |  | 2.53Leu | 5.39Val |  | 6.51Phe | 6.51Phe |
| 156Arg |  | 3.36Cys | 6.48Trp | only at timepoint 60 and 70 ns | 6.52Phe | 6.55His |
| 157Leu |  | 5.38Tyr | 6.55His |  | 6.55His |  |
| 2.53Leu |  | 5.39Val | 7.43Tyr |  | 7.43Tyr |  |
| 2.61Phe |  | 5.42Ser |  |  |  |  |
| 3.28Leu |  | 5.43Ser |  |  |  |  |
| 3.29Met |  | 5.46Ser |  |  |  |  |
| 3.32Asp |  | 6.48Trp |  |  |  |  |
| 3.33Val |  | 6.55His |  |  |  |  |
| 3.35Leu |  | 7.43Tyr |  |  |  |  |
| 3.36Cys |  |  |  |  |  |  |
| 3.37Thr |  |  |  |  |  |  |
| 3.39Ser |  |  |  |  |  |  |
| 3.40Ile |  |  |  |  |  |  |
| 4.56Val |  |  |  |  |  |  |
| 5.38Tyr |  |  |  |  |  |  |
| 5.39Val |  |  |  |  |  |  |
| 5.42Ser |  |  |  |  |  |  |
| 5.43Ser |  |  |  |  |  |  |
| 5.46Ser |  |  |  |  |  |  |
| 6.44Phe |  |  |  |  |  |  |
| 6.48Trp |  |  |  |  |  |  |
| 6.51Phe |  |  |  |  |  |  |
| 6.52Phe |  |  |  |  |  |  |
| 6.54Val |  |  |  |  |  |  |
| 6.55His |  |  |  |  |  |  |
| 7.35Val |  |  |  |  |  |  |
| 7.36Ser |  |  |  |  |  |  |
| 7.38Val |  |  |  |  |  |  |
| 7.39Thr |  |  |  |  |  |  |
| 7.42Gly |  |  |  |  |  |  |
| 7.43Tyr |  |  |  |  |  |  |
| 7.45Asn |  |  |  |  |  |  |
| Chlorpromazine | 156Arg |  | 156Arg | 6.48Trp | 156Arg | 6.48Trp | 6.48Trp |
| 157Leu |  |  |  | 6.55His | 6.51Phe | 6.51Phe |
| 2.53Leu |  |  |  |  | 6.52Phe | 6.52Phe |
| 3.29Met |  |  |  |  | 6.55His |  |
| 3.32Asp |  |  |  |  | 7.43Tyr |  |
| 3.33Val |  |  |  |  |  |  |
| 3.36Cys |  |  |  |  |  |  |
| 3.37Thr |  |  |  |  |  |  |
| 3.39Ser |  |  |  |  |  |  |
| 3.40Ile |  |  |  |  |  |  |
| 5.39Val |  |  |  |  |  |  |
| 5.42Ser |  |  |  |  |  |  |
| 5.43Ser |  |  |  |  |  |  |
| 5.46Ser |  |  |  |  |  |  |
| 5.47Phe |  |  |  |  |  |  |
| 6.44Phe |  |  |  |  |  |  |
| 6.47Cys |  |  |  |  |  |  |
| 6.48Trp |  |  |  |  |  |  |
| 6.51Phe |  |  |  |  |  |  |
| 6.52Phe |  |  |  |  |  |  |
| 6.55His |  |  |  |  |  |  |
| 7.35Val |  |  |  |  |  |  |
| 7.38Val |  |  |  |  |  |  |
| 7.39Thr |  |  |  |  |  |  |
| 7.42Gly |  |  |  |  |  |  |
| 7.43Tyr |  |  |  |  |  |  |

**Table S13 - D5R residues with Ballesteros & Weinstein-numbering** [4] **participating in different interaction types sorted by ligands.** Data was summarized for all time points. Abbreviations: Hydrocontacts – hydrophobic contacts; SB – salt-bridges; 2.5 Å – 2.5 Å-interactions; HB – hydrogen bonds; cat-π – cat-π-interactions, T-stack – T-stacking-interactions; π-π-stack – π-π-stacking-interactions. Duplicate residues per interaction type are colored red, while unique residues per interaction type are colored green.

| Interaction type | Hydrocontacts | SB | 2.5 Å | HB | Cat-π | T-stack | π-π-stack |
| --- | --- | --- | --- | --- | --- | --- | --- |
| Dopamine | 3.32Asp | 3.32Asp | 3.32Asp | 3.32Asp |  | 6.48Trp | 6.52Phe |
| 3.33Ile |  | 5.39Ala | 5.38Tyr |  | 6.51Phe | 5.38Tyr |
| 3.36Ser |  | 5.42Ser | 5.42Ser |  | 6.52Phe |  |
| 5.42Ser |  | 5.43Ser | 5.43Ser |  |  |  |
| 5.46Ser |  | 5.46Ser | 6.55Asn |  |  |  |
| 6.48Trp |  | 6.55Asn |  |  |  |  |
| 6.51Phe |  |  |  |  |  |  |
| 6.52Phe |  |  |  |  |  |  |
| 6.55Asn |  |  |  |  |  |  |
| 7-OH-DPAT | 3.28Trp | 3.32Asp | 5.39Ala | 5.39Ala |  | 6.52Phe | 6.52Phe |
| 3.29Val |  | 5.42Ser | 5.42Ser |  |  |  |
| 3.32Asp |  | 5.43Ser | 5.43Ser |  |  |  |
| 3.33Ile |  | 5.46Ser | 5.46Ser |  |  |  |
| 3.36Ser |  | 6.48Trp | 6.55Asn |  |  |  |
| 5.35Asn |  | 6.55Asn |  |  |  |  |
| 5.39Ala |  |  |  |  |  |  |
| 5.42Ser |  |  | only with No 11 |  |  |  |
| 5.43Ser |  |  |  |  |  |  |
| 5.46Ser |  |  |  |  |  |  |
| 6.48Trp |  |  |  |  |  |  |
| 6.51Phe |  |  |  |  |  |  |
| 6.52Phe |  |  |  |  |  |  |
| 6.55Asn |  |  |  |  |  |  |
| 7.35Phe |  |  |  |  |  |  |
| 7.39Val |  |  |  |  |  |  |
| 7.42Gly |  |  |  |  |  |  |
| Apomorphine | 164Leu |  | 5.39Ala | 5.39Ala |  | 6.48Trp | 5.38Tyr |
| 3.28Trp |  | 5.42Ser | 5.42Ser |  | 6.51Phe | 7.35Phe |
| 3.29Val |  | 5.43Ser | 5.43Ser |  | 6.52Phe |  |
| 3.32Asp |  | 5.46Ser | 5.46Ser |  | 7.35Phe |  |
| 3.33Ile |  | 6.55Asn | 6.55Asn |  |  | only at timepoints 85, 90 ns |
| 3.36Ser |  |  |  |  |  |  |
| 5.35Asn |  |  |  |  |  |  |
| 5.39Ala |  |  |  |  |  |  |
| 5.42Ser |  |  |  |  |  |  |
| 5.43Ser |  |  |  |  |  |  |
| 5.46Ser |  |  |  |  |  |  |
| 6.48Trp |  |  |  |  |  |  |
| 6.51Phe |  |  |  |  |  |  |
| 6.52Phe |  |  |  |  |  |  |
| 6.55Asn |  |  |  |  |  |  |
| 7.35Phe |  |  |  |  |  |  |
| Bromocriptine | 164Leu |  | 164Leu | 3.32Asp |  | 6.48Trp | 6.48Trp |
| 2.53Val |  | 2.57Val | 3.39Ser |  | 7.35Phe | 6.52Phe |
| 2.57Val |  | 3.28Trp | 5.42Ser |  |  |  |
| 3.28Trp |  | 3.32Asp | 5.43Ser |  |  |  |
| 3.29Val |  | 3.33Ile | 6.55Asn |  |  |  |
| 3.32Asp |  | 3.36Ser | 7.45Asn |  |  |  |
| 3.33Ile |  | 3.39Ser |  |  |  |  |
| 3.35Cys |  | 5.35Asn |  |  |  |  |
| 3.36Ser |  | 5.39Ala |  |  |  |  |
| 3.40Ile |  | 5.42Ser |  |  |  |  |
| 5.35Asn |  | 5.46Ser |  |  |  |  |
| 5.38Tyr |  | 6.48Trp |  |  |  |  |
| 5.39Ala |  | 6.52Phe |  |  |  |  |
| 5.42Ser |  | 6.55Asn |  |  |  |  |
| 5.43Ser |  | 7.35Phe |  |  |  |  |
| 5.46Ser |  | 7.39Val |  |  |  |  |
| 5.47Phe |  | 7.45Asn |  |  |  |  |
| 6.44Phe |  | 7.49Asn |  |  |  |  |
| 6.47Cys |  |  |  |  |  |  |
| 6.48Trp |  |  |  |  |  |  |
| 6.51Phe |  |  |  |  |  |  |
| 6.52Phe |  |  |  |  |  |  |
| 6.55Asn |  |  |  |  |  |  |
| 7.35Phe |  |  |  |  |  |  |
| 7.38Phe |  |  |  |  |  |  |
| 7.39Val |  |  |  |  |  |  |
| 7.42Gly |  |  |  |  |  |  |
| 7.45Asn |  |  |  |  |  |  |
| Clozapine | 164Leu |  | 3.32Asp | 3.32Asp |  | 6.51Phe | 5.38Tyr |
| 2.53Val |  | 5.35Asn | 5.42Ser |  | 6.52Phe | 6.48Trp |
| 2.57Val |  | 5.39Ala | 6.55Asn |  | 7.35Phe | 6.52Phe |
| 3.28Trp |  | 5.42Ser | 7.45Asn |  |  |  |
| 3.29Val |  | 6.55Asn |  |  |  |  |
| 3.32Asp |  | 7.45Asn |  |  |  |  |
| 3.33Ile |  |  |  |  |  |  |
| 3.35Cys |  |  |  |  |  |  |
| 3.36Ser |  |  |  |  |  |  |
| 3.39Ser |  |  |  |  |  |  |
| 5.38Tyr |  |  |  |  |  |  |
| 5.39Ala |  |  |  |  |  |  |
| 5.42Ser |  |  |  |  |  |  |
| 5.43Ser |  |  |  |  |  |  |
| 5.46Ser |  |  |  |  |  |  |
| 6.44Phe |  |  |  |  |  |  |
| 6.47Cys |  |  |  |  |  |  |
| 6.48Trp |  |  |  |  |  |  |
| 6.51Phe |  |  |  |  |  |  |
| 6.52Phe |  |  |  |  |  |  |
| 6.55Asn |  |  |  |  |  |  |
| 7.35Phe |  |  |  |  |  |  |
| 7.39Val |  |  |  |  |  |  |
| 7.42Gly |  |  |  |  |  |  |
| 7.45Asn |  |  |  |  |  |  |
| Nemonapride | 2.53Val | 3.32Asp | 3.32Asp | 3.32Asp | 3.28Trp | 6.48Trp | 6.48Trp |
| 2.57Val |  | 3.36Ser | 5.42Ser |  | 6.51Phe | 6.51Phe |
| 2.58Met |  | 5.42Ser | 5.46Ser |  | 6.52Phe | 6.52Phe |
| 2.61Lys |  | 5.46Ser | 6.48Trp |  |  |  |
| 3.28Trp |  | 6.48Trp | 6.55Asn |  |  |  |
| 3.29Val |  | 6.55Asn |  |  |  |  |
| 3.32Asp |  |  |  |  |  |  |
| 3.33Ile |  |  |  |  |  |  |
| 3.36Ser |  |  |  |  |  |  |
| 5.39Ala |  |  |  |  |  |  |
| 5.42Ser |  |  |  |  |  |  |
| 5.43Ser |  |  |  |  |  |  |
| 5.46Ser |  |  |  |  |  |  |
| 6.48Trp |  |  |  |  |  |  |
| 6.51Phe |  |  |  |  |  |  |
| 6.52Phe |  |  |  |  |  |  |
| 6.55Asn |  |  |  |  |  |  |
| 7.38Phe |  |  |  |  |  |  |
| 7.39Val |  |  |  |  |  |  |
| 7.42Gly |  |  |  |  |  |  |
| 7.43Trp |  |  |  |  |  |  |
| 7.46Ser |  |  |  |  |  |  |
| Sulpiride | 2.53Val | 3.32Asp | 2.61Lys | 3.29Val | 6.51Phe | 6.48Trp | 3.28Trp |
| 2.57Val |  | 3.29Val | 3.32Asp |  | 6.51Phe | 6.48Trp |
| 2.58Met |  | 3.32Asp | 3.36Ser |  | 6.52Phe |  |
| 2.61Lys |  | 3.36Ser | 5.39Ala |  |  |  |
| 3.28Trp |  | 5.39Ala | 5.42Ser |  |  |  |
| 3.29Val |  | 5.42Ser | 5.43Ser |  |  |  |
| 3.32Asp |  | 5.43Ser | 6.48Trp |  |  |  |
| 3.33Ile |  | 5.46Ser | 6.55Asn |  |  |  |
| 3.36Ser |  | 6.48Trp |  |  |  |  |
| 5.39Ala |  | 6.52Phe |  |  |  |  |
| 5.42Ser |  | 6.55Asn |  |  |  |  |
| 6.48Trp |  |  |  |  |  |  |
| 6.51Phe |  |  |  |  |  |  |
| 6.52Phe |  |  |  |  |  |  |
| 6.55Asn |  |  |  |  |  |  |
| 7.35Phe |  |  |  |  |  |  |
| 7.38Phe |  |  |  |  |  |  |
| 7.39Val |  |  |  |  |  |  |
| 7.42Gly |  |  |  |  |  |  |
| 7.43Trp |  |  |  |  |  |  |
| SCH23390 | 2.53Val | 3.32Asp | 5.39Ala | 5.39Ala |  | 6.48Trp | 6.48Trp |
| 3.28Trp |  | 5.42Ser |  |  | 6.51Phe | 6.51Phe |
| 3.29Val |  | 5.43Ser |  |  | 6.52Phe |  |
| 3.32Asp |  | 5.46Ser |  |  |  |  |
| 3.33Ile |  | 6.48Trp |  |  |  |  |
| 3.36Ser |  | 6.51Phe |  |  |  |  |
| 5.39Ala |  | 6.55Asn |  |  |  |  |
| 5.42Ser |  |  |  |  |  |  |
| 5.46Ser |  |  |  |  |  |  |
| 6.48Trp |  |  |  |  |  |  |
| 6.51Phe |  |  |  |  |  |  |
| 6.52Phe |  |  |  |  |  |  |
| 6.55Asn |  |  |  |  |  |  |
| 7.35Phe |  |  |  |  |  |  |
| 7.39Val |  |  |  |  |  |  |
| 7.42Gly |  |  |  |  |  |  |
| SKF38393 | 3.28Trp | 3.32Asp | 3.32Asp | 3.32Asp |  | 6.51Phe | 5.38Tyr |
| 3.29Val |  | 5.39Ala | 5.39Ala |  | 6.52Phe | 6.48Trp |
| 3.32Asp |  | 5.42Ser | 5.42Ser |  | 7.35Phe | 6.51Phe |
| 3.33Ile |  | 5.43Ser | 5.43Ser |  |  | 6.52Phe |
| 3.36Ser |  | 5.46Ser | 5.46Ser |  |  |  |
| 5.39Ala |  | 6.48Trp | 6.48Trp |  |  |  |
| 5.42Ser |  | 6.52Phe | 6.55Asn |  |  |  |
| 5.43Ser |  | 6.55Asn |  |  |  |  |
| 6.48Trp |  |  |  |  |  |  |
| 6.51Phe |  |  |  |  |  |  |
| 6.52Phe |  |  |  |  |  |  |
| 6.55Asn |  |  |  |  |  |  |
| 7.35Phe |  |  |  |  |  |  |
| 7.38Phe |  |  |  |  |  |  |
| 7.39Val |  |  |  |  |  |  |
| Eticlopride | 2.53Val |  | 3.32Asp | 6.48Trp | 6.48Trp | 6.48Trp | 3.32Asp |
| 2.57Val |  | 3.36Ser | 6.51Phe | 6.51Phe | 6.51Phe | 6.51Phe |
| 2.58Met |  | 5.39Ala | 6.52Phe | 6.52Phe |  |  |
| 2.61Lys |  | 5.43Ser |  |  |  |  |
| 3.28Trp |  | 6.48Trp |  |  |  |  |
| 3.29Val |  | 6.55Asn |  |  |  |  |
| 3.32Asp |  |  |  |  |  |  |
| 3.33Ile |  |  |  |  |  |  |
| 3.35Cys |  |  |  |  |  |  |
| 3.36Ser |  |  |  |  |  |  |
| 5.39Ala |  |  |  |  |  |  |
| 5.42Ser |  |  |  |  |  |  |
| 5.43Ser |  |  |  |  |  |  |
| 5.46Ser |  |  |  |  |  |  |
| 5.47Phe |  |  |  |  |  |  |
| 6.48Trp |  |  |  |  |  |  |
| 6.51Phe |  |  |  |  |  |  |
| 6.52Phe |  |  |  |  |  |  |
| 6.55Asn |  |  |  |  |  |  |
| 7.35Phe |  |  |  |  |  |  |
| 7.39Val |  |  |  |  |  |  |
| 7.42Gly |  |  |  |  |  |  |
| 7.43Trp |  |  |  |  |  |  |
| Risperidone | 164Leu |  | 2.57Val | 2.57Val |  | 6.48Trp | 5.38Tyr |
| 2.53Val |  | 3.28Trp | 3.32Asp |  | 6.51Phe | 6.48Trp |
| 2.57Val |  | 3.32Asp | 6.48Trp |  | 6.52Phe | 6.51Phe |
| 2.58Met |  | 3.35Cys | 6.55Asn |  |  | 7.35Phe |
| 2.61Lys |  | 5.35Asn |  |  |  |  |
| 3.28Trp |  | 5.42Ser |  |  |  |  |
| 3.29Val |  | 5.46Ser |  |  |  |  |
| 3.32Asp |  | 6.48Trp |  |  |  |  |
| 3.33Ile |  | 6.55Asn |  |  |  |  |
| 3.36Ser |  |  |  |  |  |  |
| 5.35Asn |  |  |  |  |  |  |
| 5.38Tyr |  |  |  |  |  |  |
| 5.39Ala |  |  |  |  |  |  |
| 5.42Ser |  |  |  |  |  |  |
| 5.43Ser |  |  |  |  |  |  |
| 5.46Ser |  |  |  |  |  |  |
| 6.48Trp |  |  |  |  |  |  |
| 6.51Phe |  |  |  |  |  |  |
| 6.52Phe |  |  |  |  |  |  |
| 6.55Asn |  |  |  |  |  |  |
| 7.35Phe |  |  |  |  |  |  |
| 7.39Val |  |  |  |  |  |  |
| 7.42Gly |  |  |  |  |  |  |
| 7.43Trp |  |  |  |  |  |  |
| 7.46Ser |  |  |  |  |  |  |
| Aripiprazole | 164Leu |  | 164Leu | 164Leu | 2.61Lys | 6.48Trp | 5.38Tyr |
| 2.53Val |  | 2.61Lys | 2.61Lys |  | 6.51Phe | 6.48Trp |
| 2.57Val |  | 3.28Trp | 3.32Asp |  | 6.52Phe | 6.51Phe |
| 2.58Met |  | 3.32Asp | 5.35Asn |  |  |  |
| 2.61Lys |  | 5.39Ala | 5.42Ser |  |  |  |
| 3.28Trp |  | 5.42Ser | 5.46Ser |  |  |  |
| 3.29Val |  | 5.43Ser | 6.48Trp |  |  |  |
| 3.32Asp |  | 5.46Ser | 6.55Asn |  |  |  |
| 3.33Ile |  | 6.55Asn |  |  |  |  |
| 3.35Cys |  |  |  |  |  |  |
| 3.36Ser |  |  |  |  |  |  |
| 5.35Asn |  |  |  |  |  |  |
| 5.38Tyr |  |  |  |  |  |  |
| 5.39Ala |  |  |  |  |  |  |
| 5.42Ser |  |  |  |  |  |  |
| 5.43Ser |  |  |  |  |  |  |
| 5.46Ser |  |  |  |  |  |  |
| 6.48Trp |  |  |  |  |  |  |
| 6.51Phe |  |  |  |  |  |  |
| 6.52Phe |  |  |  |  |  |  |
| 6.55Asn |  |  |  |  |  |  |
| 7.35Phe |  |  |  |  |  |  |
| 7.39Val |  |  |  |  |  |  |
| 7.42Gly |  |  |  |  |  |  |
| 7.43Trp |  |  |  |  |  |  |
| 7.46Ser |  |  |  |  |  |  |
| Haloperidole | 2.53Val | 3.32Asp | 3.32Asp | 3.32Asp | 6.48Trp | 6.51Phe | 6.48Trp |
| 2.57Val |  | 3.35Cys |  | 6.51Phe | 6.52Phe | 6.51Phe |
| 2.58Met |  | 3.36Ser |  |  |  | 6.52Phe |
| 2.61Lys |  | 5.46Ser |  |  |  |  |
| 3.28Trp |  | 6.48Trp |  |  |  |  |
| 3.29Val |  | 6.55Asn |  |  |  |  |
| 3.32Asp |  | 7.49Asn |  |  |  |  |
| 3.33Ile |  |  |  |  |  |  |
| 3.35Cys |  |  |  |  |  |  |
| 3.36Ser |  |  |  |  |  |  |
| 3.39Ser |  |  |  |  |  |  |
| 5.39Ala |  |  |  |  |  |  |
| 5.42Ser |  |  |  |  |  |  |
| 5.43Ser |  |  |  |  |  |  |
| 5.46Ser |  |  |  |  |  |  |
| 5.47Phe |  |  |  |  |  |  |
| 6.44Phe |  |  |  |  |  |  |
| 6.47Cys |  |  |  |  |  |  |
| 6.48Trp |  |  |  |  |  |  |
| 6.51Phe |  |  |  |  |  |  |
| 6.52Phe |  |  |  |  |  |  |
| 6.55Asn |  |  |  |  |  |  |
| 7.38Phe |  |  |  |  |  |  |
| 7.39Val |  |  |  |  |  |  |
| 7.41Phe |  |  |  |  |  |  |
| 7.42Gly |  |  |  |  |  |  |
| 7.43Trp |  |  |  |  |  |  |
| 7.46Ser |  |  |  |  |  |  |
| Spiperone | 2.53Val | 3.32Asp | 3.28Trp | 3.28Trp | 6.48Trp |  | 6.48Trp |
| 2.57Val |  | 5.46Ser | 5.46Ser |  |  |  |
| 2.58Met |  | 6.48Trp | 6.48Trp |  |  |  |
| 2.61Lys |  | 6.55Asn |  |  |  |  |
| 3.28Trp |  |  |  |  |  |  |
| 3.29Val |  |  |  |  |  |  |
| 3.32Asp |  |  |  |  |  |  |
| 3.33Ile |  |  |  |  |  |  |
| 3.35Cys |  |  |  |  |  |  |
| 3.36Ser |  |  |  |  |  |  |
| 5.38Tyr |  |  |  |  |  |  |
| 5.39Ala |  |  |  |  |  |  |
| 5.42Ser |  |  |  |  |  |  |
| 5.43Ser |  |  |  |  |  |  |
| 5.46Ser |  |  |  |  |  |  |
| 6.47Cys |  |  |  |  |  |  |
| 6.48Trp |  |  |  |  |  |  |
| 6.51Phe |  |  |  |  |  |  |
| 6.52Phe |  |  |  |  |  |  |
| 6.55Asn |  |  |  |  |  |  |
| 7.35Phe |  |  |  |  |  |  |
| 7.39Val |  |  |  |  |  |  |
| 7.42Gly |  |  |  |  |  |  |
| 7.43Trp |  |  |  |  |  |  |
| 7.46Ser |  |  |  |  |  |  |
| Chlorpromazine | 3.28Trp |  |  |  |  | 6.51Phe | 5.38Tyr |
| 3.29Val |  |  |  |  | 6.52Phe |  |
| 3.32Asp |  |  |  |  |  |  |
| 3.33Ile |  |  |  |  |  |  |
| 3.35Cys |  |  |  |  |  |  |
| 3.36Ser |  |  |  |  |  |  |
| 5.38Tyr |  |  |  |  |  |  |
| 5.39Ala |  |  |  |  |  |  |
| 5.42Ser |  |  |  |  |  |  |
| 5.43Ser |  |  |  |  |  |  |
| 5.46Ser |  |  |  |  |  |  |
| 6.48Trp |  |  |  |  |  |  |
| 6.51Phe |  |  |  |  |  |  |
| 6.52Phe |  |  |  |  |  |  |
| 6.55Asn |  |  |  |  |  |  |
| 7.35Phe |  |  |  |  |  |  |
| 7.39Val |  |  |  |  |  |  |
| 7.42Gly |  |  |  |  |  |  |

**References**

[1] Wang, S.; Che, T.; Levit, A.; Shoichet, B. K.; Wacker, D.; Roth, B. L. Structure of the D2 dopamine receptor bound to the atypical antipsychotic drug risperidone. *Nat. 2018* **2018**, 1–24.

[2] Chien, E. Y. T.; Liu, W.; Zhao, Q.; Katritch, V.; Han, G. W.; Michael, a; Shi, L.; Newman, A. H.; Javitch, J. a; Cherezov, V.; Stevens, R. C. Structure of the human dopamine D3 receptor in complex with a D2/D3 selective antagonist. *Science (80-. ).* **2011**, *330* (6007), 1091–1095.

[3] Wang, S.; Wacker, D.; Levit, A.; Che, T.; Betz, R. M.; Mccorvy, J. D.; Venkatakrishnan, A. J.; Huang, X.-P.; Dror, R. O.; Shoichet, B. K.; Roth, B. L. D 4 dopamine receptor high-resolution structures enable the discovery of selective agonists. **2017**.

[4] Ballesteros, J. A.; Weinstein, H. Integrated methods for the construction of three dimensional models and computational probing of structure-function relations in G-protein coupled receptors. *Methods Neurosci.* **1995**, *25*, 366–428.
